# Supplementary material for: Global decline in subsistence-oriented and smallholder fire use
Source: Research Square preprint supplement (doi:10.21203/rs.3.rs-666635/v1), 2021-07-16
Supplement: Supplementary file 2 [file f0fa342cd1cbe07d1416e7db.xlsx]

## Sheet: Source
SID	RF	NP	YR	RM	LA	NO
1.i	Kepe, T., 2005. Grasslands ablaze: vegetation burning by rural people in Pondoland, South Africa. South African Geographical Journal, 87(1), pp.10-17.	2	2005	E; I; P; R; A	English
1.ii	Kepe, T. and Scoones, I., 1999. Creating grasslands: social institutions and environmental change in Mkambati area, South Africa. Human Ecology, 27(1), pp.29-53.	2	1999	I; P; A	English
2	Terán, S., and Rasmussen, C.H., 2009. La milpa de los Mayas. Mexico City: Universidad Nacional Autónoma de México.	1	2013	U	Spanish	Information taken from citation in Nigh, R. and Diemont, S.A., 2013. The Maya milpa: fire and the legacy of living soil. Frontiers in Ecology and the Environment, 11(s1), pp.e45-e54.
3	Nigh, R., 2008. Trees, fire and farmers: making woods and soil in the Maya forest. Journal of Ethnobiology, 28(2), pp.231-243.	1	2008	E; S	English
4.i	Levy-Tacher, S. I., 2000. Sucesión causada por roza-tumba-quema en las selvas de Lacanhá Chansayab, Chiapas. PhD thesis, Montecillo, Texcoco, Edo. De Mexico.	2	2000	S; I	Spanish
4.ii	Levy-Tacher, S.I. and Rivera, J.R.A., 2005. Successional pathways derived from different vegetation use patterns by Lacandon Mayan Indians. Journal of Sustainable Agriculture, 26(1), pp.49-82.	2	2005	S; I	English
5	Diemont, S.A., 2006. Ecosystem management and restoration as practiced by the indigenous Lacandon Maya of Chiapas, Mexico. PhD thesis, The Ohio State University.	1	2006	E; I; S	English
6	Ansell, J. and Evans, J., 2020. Contemporary Aboriginal savanna burning projects in Arnhem Land: a regional description and analysis of the fire management aspirations of Traditional Owners. International Journal of Wildland Fire, 29(5), pp.371-385.	1	2020	A	English
7	Goldstein, J.E., Graham, L., Ansori, S., Vetrita, Y., Thomas, A., Applegate, G., Vayda, A.P., Saharjo, B.H. and Cochrane, M.A., 2020. Beyond slash‐and‐burn: The roles of human activities, altered hydrology and fuels in peat fires in Central Kalimantan, Indonesia. Singapore Journal of Tropical Geography.	1	2020	I; S	English
8	Thet, A.P.P. and Tokuchi, N., 2020. Traditional knowledge on shifting cultivation of local communities in Bago Mountains, Myanmar. Journal of Forest Research, pp.1-7.	1	2020	F; I; E; S	English
9	Bos, S.P., Cornioley, T., Dray, A., Waeber, P.O. and Garcia, C.A., 2020. Exploring livelihood strategies of shifting cultivation farmers in Assam through games. Sustainability, 12(6), p.2438.	1	2020	P	English
10	Lopes, A. A., Viriyavipart, A., & Tasneem, D. 2020. The role of social influence in crop residue management: evidence from Northern India. Ecological Economics, 169, 106563.	1	2020	Q	English
11	Boossabong, P. and Chamchong, P., 2020. Public policy in the face of post-truth politics and the role of deliberation. Critical Policy Studies, pp.1-18.	1	2020	P	English
12.i	Tiyapairat, Y. 2012. Public sector responses to sustainable haze management in Upper Northern Thailand. Environment Asia, 5(2).	2	2012	I; A	English
12.ii	Tiyapairat, Y. and Sajor, E.E., 2012. State simplification, heterogeneous causes of vegetation fires and implications on local haze management: case study in Thailand. Environment, development and sustainability, 14(6), pp.1047-1064.	2	2012	I; A; Q	English
13	McKemey, M., Ens, E., Rangers, Y.M., Costello, O. and Reid, N., 2020. Indigenous knowledge and seasonal calendar inform adaptive savanna burning in northern Australia. Sustainability, 12(3), p.995.	1	2020	P; I; F	English
14	Chowdhury, M., Bhattarai, T.R., De Ridder, M. and Beeckman, H., 2020. Growth-ring analysis of Diploknema butyracea is a potential tool for revealing Indigenous land use history in the lower Himalayan foothills of Nepal. Forests, 11(2), p.242.	1	2020	S	English
15	Fang, Y., Xu, K., Guo, X. and Hong, Y., 2020. Identifying determinants of straw open field burning in northeast China: toward greening agriculture base in newly industrializing countries. Journal of Rural Studies, 74, pp.111-123.	1	2020	I; R	English
16	Paudel, A., Markwith, S., Konchar, K., Shrestha, M. and Ghimire, S., 2020. Anthropogenic fire, vegetation structure, and ethnobotanical uses in an alpine shrubland of Nepal's Himalaya. International Journal of Wildland Fire, 29, p201	1	2020	I; S	English
17	Asuoha, G.C., Okafor, U.P., Phil-Eze, P.O. and Ayadiuno, R.U., 2019. The impact of soil erosion on biodiversity conservation in Isiala Ngwa North LGA, Southeastern Nigeria. Sustainability, 11(24), p.7192.	1	2019	I; S	English
18	McKemey, M.B., Patterson, M.L., Rangers, B., Ens, E.J., Reid, N.C., Hunter, J.T., Costello, O., Ridges, M. and Miller, C., 2019. Cross-cultural monitoring of a cultural keystone species informs revival of Indigenous burning of country in South-Eastern Australia. Human Ecology, 47(6), pp.893-904.	1	2019	P; I; S	English
19	Hirahara, S., 2020. Regeneration of underused natural resources by collaboration between urban and rural residents: a case study in Fujiwara District, Japan. International Journal of the Commons, 14(1).	1	2020	I; E; A	English
20.i	Johansson, M.U., Fetene, M., Malmer, A. and Granström, A., 2012. Tending for cattle: traditional fire management in Ethiopian montane heathlands. Ecology and Society, 17(3).	5	2012	I; S; E	English
20.ii	Johansson, M.U., Senay, S., Creathorn, E., Kassa, H. and Hylander, K., 2019. Change in heathland fire sizes inside vs. outside the Bale Mountains National Park, Ethiopia, over 50 years of fire-exclusion policy: lessons for REDD+. Ecology and Society, 24(4).	5	2019	I; R	English
20.iii	Johansson, M.U., 2013. Fire and grazing in subalpine heathlands and forests of Bale Mountains, Ethiopia. PhD thesis, Swedish University of Agricultural Sciences.	5	2013	I; S; E	English
20.iv	Johansson, M.U. and Granström, A., 2014. Fuel, fire and cattle in African highlands: traditional management maintains a mosaic heathland landscape. Journal of Applied Ecology, 51(5), pp.1396-1405	5	2014	S	English
20.v	Johansson, M.U., Frisk, C.A., Nemomissa, S. and Hylander, K., 2018. Disturbance from traditional fire management in subalpine heathlands increases Afro‐alpine plant resilience to climate change. Global change biology, 24(7), pp.2952-2964.	5	2018	S	English
21	Sun, D., Ge, Y. and Zhou, Y., 2019. Punishing and rewarding: How do policy measures affect crop straw use by farmers? An empirical analysis of Jiangsu Province of China. Energy Policy, 134, p.110882.	1	2019	I; Q	English
22	Cammelli, F. and Angelsen, A., 2019. Amazonian farmers' response to fire policies and climate change. Ecological Economics, 165, p.106359.	1	2019	I; O	English
23	Watts, J.D., Tacconi, L., Hapsari, N., Irawan, S., Sloan, S. and Widiastomo, T., 2019. Incentivizing compliance: evaluating the effectiveness of targeted village incentives for reducing burning in Indonesia. Forest Policy and Economics, 108, p.101956.	1	2019	Q; I; F	English
24.i	Marks-Block, T., Lake, F.K. and Curran, L.M., 2019. Effects of understory fire management treatments on California Hazelnut, an ecocultural resource of the Karuk and Yurok Indians in the Pacific Northwest. Forest Ecology and Management, 450, p.117517.	2	2019	P; S; E; I	English
24.ii	Marks-Block, T., Lake, F.K., Bird, R.B. and Curran, L.M., 2021. Revitalized Karuk and Yurok cultural burning to enhance California hazelnut for basketweaving in northwestern California, USA. Fire Ecology, 17(1), pp.1-20.	2	2021	P; S; E; I	English
25	Neale, T., & Macdonald, J. M. (2019). Permits to burn: weeds, slow violence, and the extractive future of northern Australia. Australian Geographer, 50(4), 417-433.	1	2019	I; A	English
26	Jajtic, K., Galijan, Valentina, Zafran, I. and Cvitanović, M., 2019. Analysing wildfire occurrence through a mixed-method approach: a case study from the Croatian Mediterranean. Erdkunde, 73(4), pp.323-341.	1	2019	I; R	English
27	Slaton, M.R., Holmquist, J.G., Meyer, M., Andrews, R. and Beidl, J., 2019. Traditional ecological knowledge used in forest restoration benefits natural and cultural resources: the intersection between pandora moths, jeffrey pine, people, and fire. Natural Areas Journal, 39(4), pp.461-471.	1	2019	P; S	English
28	Falkowski, T.B., Chankin, A. and Diemont, S.A., 2019. Successional changes in vegetation and litter structure in traditional Lacandon Maya agroforests. Agroecology and Sustainable Food Systems, pp.1-21.	1	2019	S; I	English
29	Fujisawa, N., 2019. Production, consumption, and culture of upland rice in swiddens: a case study of a campesino community in Panama. Human Ecology, 47(4), pp.541-552.	1	2019	I; E	English
30	Dobler-Morales, C., Roy Chowdhury, R. and Schmook, B., 2019. Governing intensification: the influence of state institutions on smallholder farming strategies in Calakmul, Mexico. Journal of Land Use Science, pp.1-19.	1	2019	Q; I	English
31	Neale, T., Carter, R., Nelson, T. and Bourke, M., 2019. Walking together: a decolonising experiment in bushfire management on Dja Dja Wurrung country. Cultural Geographies, 26(3), pp.341-359.	1	2019	P; E; I	English
32.i	Temudo, M.P., Oom, D. and Pereira, J.M., 2020. Bio-cultural fire regions of Guinea-Bissau: Analysis combining social research and satellite remote sensing. Applied Geography, 118, p.102203.	4	2020	R; E; F; P; I	English
32.ii	Temudo, M.P. and Santos, P., 2017. Shifting environments in Eastern Guinea-Bissau, West Africa: The length of fallows in question. NJAS-Wageningen Journal of Life Sciences, 80, pp.57-64.	4	2017	E; I; F; R	English
32.iii	Temudo, M.P., Figueira, R. and Abrantes, M., 2015. Landscapes of bio-cultural diversity: shifting cultivation in Guinea-Bissau, West Africa. Agroforestry Systems, 89(1), pp.175-191.	4	2015	E; Q; I	English
32.iv	Temudo, M.P. and Abrantes, M., 2014. The cashew frontier in Guinea-Bissau, West Africa: changing landscapes and livelihoods. Human ecology, 42(2), pp.217-230.	4	2014	E; Q; I; F	English
33	Li, A. and Ford, J., 2019. Understanding socio-ecological vulnerability to climatic change through a trajectories of change approach: a case study from an Indigenous community in Panama. Weather, Climate, and Society, 11(3), pp.577-593.	1	2019	I; P; E; F	English
34	Wynecoop, M.D., Morgan, P., Strand, E.K. and Trigueros, F.S., 2019. Getting back to fire suméŝ: exploring a multi-disciplinary approach to incorporating traditional knowledge into fuels treatments. Fire Ecology, 15(1), p.17.	1	2019	P; R; S	English
35	Ngurra, D., Dadd, L., Glass, P., Scott, R., Graham, M., Judge, S., Hodge, P. and Suchet-Pearson, S., 2019. Yanama budyari gumada: reframing the urban to care as Darug Country in western Sydney. Australian Geographer, 50(3), pp.279-293.	1	2019	E	English
36.i	Keck, M. and Trong Hung, D., 2019. Burn or bury? A comparative cost–benefit analysis of crop residue management practices among smallholder rice farmers in northern Vietnam. Sustainability Science, 14(2), pp.375-389.	2	2019	I; Q; P; S	English
36.ii	Trong Hung, D., Hughes, H.J., Keck, M. and Sauer, D., 2019. Rice-residue management practices of smallholder farms in Vietnam and their effects on nutrient fluxes in the soil-plant system. Sustainability, 11(6), p.1641.	2	2019	S	English
37	Huertas Herrera, A., Ballera, B., Guillermo, B.L., Toro Manríquez, M. and Huertas Ramírez, H., 2019. Manejo de la quema de pastizales de sabana inundable: una mirada del pueblo originario Sáliva en Colombia. Chungará (Arica), 51(1), pp.167-176.	1	2019	E; I	Spanish
38	Fonseca-Cepeda, V., Idrobo, C. and Restrepo, S., 2019. The changing chagras: traditional ecological knowledge transformations in the Colombian Amazon. Ecology and Society, 24(1).	1	2019	E; I	English
39.i	Carmenta, R., Coudel, E. and Steward, A.M., 2019. Forbidden fire: Does criminalising fire hinder conservation efforts in swidden landscapes of the Brazilian Amazon?. The Geographical Journal, 185(1), pp.23-37.	3	2019	E; I; Q; P; F	English
39.ii	Carmenta, R. 2013. From earth observation to ethnography: examining smallholder fire management in the Brazilian Amazon. PhD thesis, Unviersity of Lancaster	3	2013	E; I; Q; P; F; R	English
39.iii	Steward, A. M. 2018. Fire use among swidden farmers in central Amazonia. In C. T. Fowler and J. R. Welch (Eds.) Fire otherwise: ethnobiology of burning for a changing world, pp. 104-127. The University of Utah Press.	3	2018	I; E	English
40.i	Devisscher, T., Malhi, Y. and Boyd, E., 2019. Deliberation for wildfire risk management: addressing conflicting views in the Chiquitania, Bolivia. The Geographical Journal, 185(1), pp.38-54.	2	2019	I; F	English
40.ii	Devisscher, T., Boyd, E. and Malhi, Y., 2016. Anticipating future risk in social-ecological systems using fuzzy cognitive mapping: the case of wildfire in the Chiquitania, Bolivia. Ecology and Society, 21(4).	2	2016	I; F	English
41.i	Cogos, S., Östlund, L. and Roturier, S., 2019. Forest fire and indigenous Sami land use: place names, fire dynamics, and ecosystem change in Northern Scandinavia. Human Ecology, 47(1), pp.51-64.	2	2019	I; A; S	English
41.ii	Cogos, S. 2020. Fire, people and reindeer in the boreal forest. The role of fire in the historical and contemporary interactions between Sami reindeer herding and forest management in northern Sweden. PhD thesis, Swedish University of Agricultural Sciences and Universite Paris-Saclay.	2	2020	I; A; E	English	Thesis also available in French
42	Bose, P., 2019. Oil palm plantations vs. shifting cultivation for indigenous peoples: analyzing Mizoram's New Land Use Policy. Land use policy, 81, pp.115-123.	1	2019	I; F; E	English
43	Rai, N.D., Benjaminsen, T.A., Krishnan, S. and Madegowda, C., 2019. Political ecology of tiger conservation in India: adverse effects of banning customary practices in a protected area. Singapore Journal of Tropical Geography, 40(1), pp.124-139.	1	2019	I; F; P; Q	English
44	Ianovali, D., Adams, C., Ribeiro Filho, A.A. and Khatounian, C.A., 2018. Produtividade agrícola e mudanças socioculturais: a agricultura quilombola no Vale do Ribeira-SP Brasil. Desenvolvimento e Meio Ambiente, 49.	1	2018	E; I; Q	Portuguese
45	Martín, V.C., Cuerno, C.C., Pedraja, C.G., de la Puente Fernández, L., Mantecón, V.R. and Fernández, I.V., 2018. 597. Uso del fuego y conflictividad social en la montaña Cantábrica: el valle del Nansa (1750-1850). Scripta Nova. Revista Electrónica de Geografía y Ciencias Sociales, 22.	1	2018	U	Spanish
46	Nyongesa, K.W. and Vacik, H., 2018. Fire management in Mount Kenya: a case study of Gathiuru Forest Station. Forests, 9(8), p.481.	1	2018	F; Q	English
47	Ngone, M.H., Koottatep, T., Fakkaew, K. and Polprasert, C., 2018. Assessment of nutrient recovery, air emission and farmers’ perceptions of indigenous mound burning practice using animal and human wastes in Myanmar. Agriculture, Ecosystems & Environment, 261, pp.54-61.	1	2018	Q	English
48	Kilawe, C.J., Mertz, O., Birch-Thomsen, T. and Maliondo, S.M., 2018. Transformation of shifting cultivation: Extent, driving forces and impacts on livelihoods in Tanzania. Applied geography, 94, pp.84-94.	1	2018	Q; F; R	English
49	Thung, P.H., 2018. A case study on the persistence of swidden agriculture in the context of post-2015 anti-haze regulation in West-Kalimantan. Human Ecology, 46(2), pp.197-205.	1	2018	I; E	English
50	Lewis, M., Christianson, A. and Spinks, M., 2018. Return to flame: reasons for burning in Lytton First Nation, British Columbia. Journal of Forestry, 116(2), pp.143-150.	1	2018	I	English
51	Meilasari-Sugiana, A.D., 2018. Oil palm companies, privatization and social dissonance: towards a socially viable and ecologically sustainable land reform in Tanah Laut Regency, South Kalimantan, Indonesia. Journal of Political Ecology, 25(1), pp.548-568.	1	2018	E; I; A	English
52.i	Monzón-Alvarado, C.M., 2018. El manejo del fuego en Calakmul, Campeche: incendios forestales, gobernanza y variabilidad local de la precipitación. CIENCIA ergo-sum, Revista Científica Multidisciplinaria de Prospectiva, 25(3).	3	2018	A; E; I; F	Spanish
52.ii	Monzón-Alvarado, C.M. and Keys, E., 2017. Synergistic vulnerabilities: climate variability and fire management policy increase farming challenges in southeastern Mexico. Regional Environmental Change, 17(2), pp.489-500.	3	2017	I; P; E	English
52.iii	Monzón-Alvarado, C.M., Waylen, P. and Keys, E., 2014. Fire management and climate variability: Challenges in designing environmental regulations. Land use policy, 39, pp.12-21.	3	2014	E; I; S; P	English
53	Tavares, V.C., 2018. A percepção ambiental dos agricultores rurais do município de queimadas/Pb sobre a degradação do bioma caatinga. Acta Geográfica, 12(28), pp.74-89.	1	2018	I; A	Portuguese
54	Bonta, M., Gosford, R., Eussen, D., Ferguson, N., Loveless, E. and Witwer, M., 2017. Intentional fire-spreading by “Firehawk” raptors in Northern Australia. Journal of Ethnobiology, 37(4), pp.700-718.	1	2017	E; I	English
55	Fantini, A.C., Bauer, E., de Valois, C.M. and Siddique, I., 2017. The demise of swidden-fallow agriculture in an Atlantic Rainforest region: implications for farmers’ livelihood and conservation. Land Use Policy, 69, pp.417-426.	1	2017	I; R	English
56	Pérez-García, O. and del Castillo, R.F., 2017. Shifts in swidden agriculture alter the diversity of young fallows: is the regeneration of cloud forest at stake in southern Mexico?. Agriculture, Ecosystems & Environment, 248, pp.162-174.	1	2017	S; I	English
57	Long, J.W., Goode, R.W., Gutteriez, R.J., Lackey, J.J. and Anderson, M.K., 2017. Managing California black oak for tribal ecocultural restoration. Journal of Forestry, 115(5), pp.426-434.	1	2017	I; P; S	English
58.i	Coomes, O.T., Takasaki, Y. and Rhemtulla, J.M., 2017. What fate for swidden agriculture under land constraint in tropical forests? Lessons from a long-term study in an Amazonian peasant community. Journal of Rural Studies, 54, pp.39-51.	3	2017	I; R	English
58.ii	Coomes, O.T., Grimard, F. and Burt, G.J., 2000. Tropical forests and shifting cultivation: secondary forest fallow dynamics among traditional farmers of the Peruvian Amazon. Ecological economics, 32(1), pp.109-124.	3	2000	Q; S; I	English
58.iii	Coomes, O.T. and Burt, G.J., 1997. Indigenous market-oriented agroforestry: dissecting local diversity in western Amazonia. Agroforestry systems, 37(1), pp.27-44.	3	1997	I; Q	English
59	Mensah-Bonsu, A., Sarpong, D.B., Al-Hassan, R., Asuming-Brempong, S., Egyir, I.S., Kuwornu, J.K. and Osei-Asare, Y.B., 2017. Intensity of and factors affecting land and water management practices among smallholder maize farmers in Ghana. African Journal of Agricultural and Resource Economics, 12(311-2017-735), pp.142-157.	1	2017	Q	English
60	Sony, K.C. and Upreti, B.R., 2017. The political economy of cardamom farming in eastern Nepal: crop disease, coping strategies, and institutional innovation. SAGE Open, 7(2), p.2158244017705422.	1	2017	I; F	English
61	Purnomo, H., Shantiko, B., Sitorus, S., Gunawan, H., Achdiawan, R., Kartodihardjo, H. and Dewayani, A.A., 2017. Fire economy and actor network of forest and land fires in Indonesia. Forest Policy and Economics, 78, pp.21-31.	1	2017	I; F	English
62	Zwartendijk, B.W., Van Meerveld, H.J., Ghimire, C.P., Bruijnzeel, L.A., Ravelona, M. and Jones, J.P.G., 2017. Rebuilding soil hydrological functioning after swidden agriculture in eastern Madagascar. Agriculture, ecosystems & environment, 239, pp.101-111.	1	2017	I; S	English
63.i	Usman, I.S., Bzugu, P.M., Pur, J.T. and Abdullahi, A., 2017. Indigenous control methods for parasites among pastoralists communities in Adamawa State, Nigeria. Journal of Agricultural Extension, 21(1), pp.109-121.	2	2017	Q	English
63.ii	Usman, I.S., Bakari, U.M. and Abdullahi, A., 2017. Crop farmers and herders conflicts in Girei Local Government Area, Adamawa State, Nigeria: causes, repercussions and resolutions. Scientific Papers: Management, Economic Engineering in Agriculture & Rural Development, 17(1).	2	2017	Q	English
64.i	Steen-Adams, M.M., Charnley, S., McLain, R.J., Adams, M.D. and Wendel, K.L., 2019. Traditional knowledge of fire use by the Confederated Tribes of Warm Springs in the eastside Cascades of Oregon. Forest Ecology and Management, 450, p.117405.	2	2019	A; I; S; R	English
64.ii	Steen-Adams, M.M., Charnley, S. and Adams, M.D., 2017. Historical perspective on the influence of wildfire policy, law, and informal institutions on management and forest resilience in a multiownership, frequent-fire, coupled human and natural system in Oregon, USA. Ecology and Society, 22(3).	2	2017	A; I; R; S	English
65	Langer, E.L. and McGee, T.K., 2017. Wildfire risk awareness and prevention by predominantly Māori rural residents, Karikari Peninsula, Aotearoa New Zealand. International journal of wildland fire, 26(9), pp.820-828.	1	2017	I	English
66	Salinas-Melgoza, M.A., Skutsch, M., Lovett, J.C. and Borrego, A., 2017. Carbon emissions from dryland shifting cultivation: a case study of Mexican tropical dry forest. Silva Fennica, 51(1B).	1	2017	S	English
67	Tani, Y., Hashimoto, S. and Ochiai, M., 2016. What makes rural, traditional, cultures more sustainable? Implications from conservation efforts in mountainous rural communities of Japan. Landscape Research, 41(8), pp.892-905.	1	2016	I; Q	English
68	Diver, S., 2016. Co-management as a catalyst: pathways to post-colonial forestry in the Klamath Basin, California. Human Ecology, 44(5), pp.533-546.	1	2016	I; E; A	English
69	Nagata, Y.K. and Ushimaru, A., 2016. Traditional burning and mowing practices support high grassland plant diversity by providing intermediate levels of vegetation height and soil pH. Applied Vegetation Science, 19(4), pp.567-577.	1	2016	S	English
70.i	Bird, D.W., Bird, R.B., Codding, B.F. and Taylor, N., 2016. A landscape architecture of fire: Cultural emergence and ecological pyrodiversity in Australia’s Western Desert. Current Anthropology, 57(S13), pp.S65-S79.	8	2016	E; R	English
70.ii	Codding, B.F., Bird, R.B., Kauhanen, P.G. and Bird, D.W., 2014. Conservation or co-evolution? Intermediate levels of aboriginal burning and hunting have positive effects on kangaroo populations in Western Australia. Human Ecology, 42(5), pp.659-669.	8	2014	S; R; E	English
70.iii	Bird, D.W., Bird, R.B. and Parker, C.H., 2004. Women who hunt with fire: Aboriginal resource use and fire regimes in Australia's Western Desert. Australian Aboriginal Studies, 2004(1), pp.90-97	8	2004	E; S	English
70.iv	Bird, D.W., Bird, R.B. and Parker, C.H., 2005. Aboriginal burning regimes and hunting strategies in Australia’s Western Desert. Human ecology, 33(4), pp.443-464.	8	2005	E; S	English
70.v	Bird, R.B., Bird, D.W., Codding, B.F., Parker, C.H. and Jones, J.H., 2008. The “fire stick farming” hypothesis: Australian Aboriginal foraging strategies, biodiversity, and anthropogenic fire mosaics. Proceedings of the National Academy of Sciences, 105(39), pp.14796-14801.	8	2008	E; S; R	English
70.vi	Bird, R.B., Codding, B.F., Kauhanen, P.G. and Bird, D.W., 2012. Aboriginal hunting buffers climate-driven fire-size variability in Australia’s spinifex grasslands. Proceedings of the National Academy of Sciences, 109(26), pp.10287-10292.	8	2012	E; R	English
70.vii	Bird, R.B., Tayor, N., Codding, B.F. and Bird, D.W., 2013. Niche construction and Dreaming logic: aboriginal patch mosaic burning and varanid lizards (Varanus gouldii) in Australia. Proceedings of the Royal Society B: Biological Sciences, 280(1772), p.20132297.	8	2013	E; S	English
70.viii	Bliege Bird, R., Bird, D.W. and Codding, B.F., 2016. People, El Nino southern oscillation and fire in Australia: fire regimes and climate controls in hummock grasslands. Philosophical Transactions of the Royal Society B: Biological Sciences, 371(1696), p.20150343.	8	2016	R; E	English
71	Robinson, C.J., James, G. and Whitehead, P.J., 2016. Negotiating Indigenous benefits from payment for ecosystem service (PES) schemes. Global Environmental Change, 38, pp.21-29.	1	2016	I; P	English
72	Ancog, R.C., Florece, L.M. and Nicopior, O.B., 2016. Fire occurrence and fire mitigation strategies in a grassland reforestation area in the Philippines. Forest Policy and Economics, 64, pp.35-45.	1	2016	R; Q	English
73	Conteh, A.M., Moiwo, J.P. and Yan, X., 2016. Using a logistic regression model to analyze alley farming adoption factors in Sierra Leone. Small-scale forestry, 15(1), pp.109-125.	1	2016	Q; I; E	English
74	Jakovac, C.C., Peña-Claros, M., Mesquita, R.C., Bongers, F. and Kuyper, T.W., 2016. Swiddens under transition: consequences of agricultural intensification in the Amazon. Agriculture, Ecosystems & Environment, 218, pp.116-125.	1	2016	E; I; S	English
75	de Freitas Viana, F.M., Steward, A.M. and Richers, B.T.T., 2016. Cultivo itinerante na Amazônia central: manejo tradicional e transformações da paisagem. Novos Cadernos NAEA, 19(1).	1	2016	E; I; R	Portuguese
76	Kim, D.G., Taddese, H., Belay, A. and Kolka, R., 2016. The impact of traditional fire management on soil carbon and nitrogen pools in a montane forest, southern Ethiopia. International Journal of Wildland Fire, 25(10), pp.1110-1116.	1	2016	S; I	English
77	Baicha, W., 2016. Land use dynamics and land cover structure change in Thailand (as exemplified by mountainous Nan Province). Geography and Natural Resources, 37(1), pp.87-92.	1	2016	R	English
78	Randrianarison, A., Schlaepfer, R., Mills, R., Hervé, D., Razanaka, S., Rakotoarimanana, V., Carrière, S.M. and Buttler, A., 2016. Linking historical land use to present vegetation and soil characteristics under slash‐and‐burn cultivation in Madagascar. Applied Vegetation Science, 19(1), pp.40-52.	1	2016	S; I	English
79	Rusinamhodzi, L., Corbeels, M. and Giller, K.E., 2016. Diversity in crop residue management across an intensification gradient in southern Africa: system dynamics and crop productivity. Field Crops Research, 185, pp.79-88.	1	2016	Q	English
80.i	Caillault, S., 2011. Le feu, la brousse et la savane. Modélisation spatiale de la dynamique des paysages soudaniens (Burkina Faso). PhD thesis, Université de Caen.	3	2011	R; A; E; I	French
80.ii	Caillault, S., Ballouche, A. and Delahaye, D., 2015. Where are the ‘bad fires’ in West African savannas? Rethinking burning management through a space–time analysis in Burkina Faso. The Geographical Journal, 181(4), pp.375-387.	3	2015	R	English
80.iii	Laris, P., Caillault, S., Dadashi, S. and Jo, A., 2015. The human ecology and geography of burning in an unstable savanna environment. Journal of Ethnobiology, 35(1), pp.111-139.	3	2015	R	English
81.i	Desbureaux, S. and Brimont, L., 2015. Between economic loss and social identity: the multi-dimensional cost of avoiding deforestation in eastern Madagascar. Ecological Economics, 118, pp.10-20.	2	2015	Q	English
81.ii	Brimont, L., Ezzine-de-Blas, D., Karsenty, A. and Toulon, A., 2015. Achieving conservation and equity amidst extreme poverty and climate risk: The Makira REDD+ project in Madagascar. Forests, 6(3), pp.748-768.	2	2015	I; Q	English
82.i	Ahmed, T., Ahmad, B. and Ahmad, W., 2015. Why do farmers burn rice residue? Examining farmers’ choices in Punjab, Pakistan. Land Use Policy, 47, pp.448-458.	2	2015	Q	English
82.ii	Ahmed, T., Ahmad, B. and Ahmad, W. 2019. Burning crop residue: farmers’ choice among various practices. Pakistan Journal of Applied Economics, 29(2), pp.265-290.	2	2019	Q	English
83	Obaniyi, K.S., Kolawole, A., Ajala, A., Adeyonu, A. and Oguntade, A., 2020. Assessment of crop farmers' coping strategies to pastoralism/nomad activities in Nigeria. Open Agriculture, 5(1), pp.219-226.	1	2020	Q	English
84	Seijo, F., Millington, J.D., Gray, R., Sanz, V., Lozano, J., García-Serrano, F., Sangüesa-Barreda, G. and Camarero, J.J., 2015. Forgetting fire: traditional fire knowledge in two chestnut forest ecosystems of the Iberian Peninsula and its implications for European fire management policy. Land Use Policy, 47, pp.130-144.	1	2015	S; I; Q	English
85	Martínez-Torres, H.L., Castillo, A., Ramírez, M.I. and Pérez-Salicrup, D.R., 2016. The importance of the traditional fire knowledge system in a subtropical montane socio-ecosystem in a protected natural area. International Journal of Wildland Fire, 25(9), pp.911-921.	1	2016	E; I	English
86.i	Walters, G.M., 2010. The Land Chief’s embers: ethnobotany of Batéké fire regimes, savanna vegetation and resource use in Gabon. PhD thesis, University College London.	3	2010	A; E; I; P; F; R; S	English
86.ii	Walters, G.M., 2012. Customary fire regimes and vegetation structure in Gabon’s Bateke Plateaux. Human Ecology, 40(6), pp.943-955.	3	2012	S; R; E; I	English
86.iii	Walters, G.M., 2015. Changing fire governance in Gabon’s Plateaux Bateke savanna landscape. Conservation and Society, 13(3), pp.275-286.	3	2015	A; E; I; P; F	English
87	Anderson, M.K. and Rosenthal, J., 2015. An ethnobiological approach to reconstructing indigenous fire regimes in the foothill chaparral of the western Sierra Nevada. Journal of Ethnobiology, 35(1), pp.4-36.	1	2015	I	English
88	Spoon, J., Arnold, R., Lefler, B.J. and Milton, C., 2015. Nuwuvi (Southern Paiute), shifting fire regimes, and the carpenter one fire in the spring mountains national recreation area, Nevada. Journal of Ethnobiology, 35(1), pp.85-110.	1	2015	I; P	English
89.i	Laris, P., 2002. Burning the seasonal mosaic: preventative burning strategies in the wooded savanna of southern Mali. Human Ecology, 30(2), pp.155-186.	3	2002	R; I; Q	English
89.ii	Laris, P., 2011. Humanizing savanna biogeography: linking human practices with ecological patterns in a frequently burned savanna of southern Mali. Annals of the Association of American Geographers, 101(5), pp.1067-1088.	3	2011	R; I; Q	English
89.iii	Laris, P., Caillault, S., Dadashi, S. and Jo, A., 2015. The human ecology and geography of burning in an unstable savanna environment. Journal of Ethnobiology, 35(1), pp.111-139.	3	2015	R; I; Q	English
89.iv	Laris, P., 2004. Grounding environmental narratives: the impact of a century of fighting against fire in Mali. In W.G. Moseley and B.I. Logan (Eds.) African environment and development: rhetoric, programs, realities, pp.63-85. Cambridge University Press.	3	2004	I; A	English
90	Fache, E. and Moizo, B., 2015. Do burning practices contribute to caring for country? Contemporary uses of fire for conservation purposes in indigenous Australia. Journal of Ethnobiology, 35(1), pp.163-182.	1	2015	E	English
91	Petty, A.M., deKoninck, V. and Orlove, B., 2015. Cleaning, protecting, or abating? Making Indigenous fire management “work” in Northern Australia. Journal of Ethnobiology, 35(1), pp.140-162.	1	2015	I; A; E	English
92.i	Welch, J.R., 2015. Learning to hunt by tending the fire: Xavante youth, ethnoecology, and ceremony in central Brazil. Journal of Ethnobiology, 35(1), pp.183-208.	5	2015	E	English
92.ii	Welch, J.R., 2014. Xavante ritual hunting: anthropogenic fire, reciprocity, and collective landscape management in the Brazilian cerrado. Human Ecology, 42(1), pp.47-59.	5	2014	E	English
92.iii	Welch, J.R., Santos, R.V., Flowers, N.M. and Coimbra Jr, C.E., 2013. Na primeira margem do rio: território e ecologia do povo Xavante de Wedezé. Museu do Índio/FUNAI.	5	2013	I; A; S; F; R	Portuguese
92.iv	Welch, J.R., Brondízio, E.S., Hetrick, S.S. and Coimbra Jr, C.E., 2013. Indigenous burning as conservation practice: Neotropical savanna recovery amid agribusiness deforestation in Central Brazil. PloS one, 8(12), p.e81226.	5	2013	R; E; S; P	English
92.v	Welch, J.R. and Coimbra Jr, C.E., 2019. Indigenous fire ecologies, restoration, and territorial sovereignty in the Brazilian Cerrado: The case of two Xavante reserves. Land Use Policy, p.104055.	5	2019	E; R	English
93	Emperaire, L. and Eloy, L., 2015. Amerindian Agriculture in an Urbanising Amazonia (Rio Negro, Brazil). Bulletin of Latin American Research, 34(1), pp.70-84.	1	2015	I; S; R	English
94	Schmerbeck, J., Kohli, A. and Seeland, K., 2015. Ecosystem services and forest fires in India—context and policy implications from a case study in Andhra Pradesh. Forest Policy and Economics, 50, pp.337-346.	1	2015	Q; F; R	English
95	Eriksen, C. and Hankins, D.L., 2014. The retention, revival, and subjugation of indigenous fire knowledge through agency fire fighting in Eastern Australia and California. Society & Natural Resources, 27(12), pp.1288-1303.	1	2014	I	English
96	Zhang, R., Wei, T., Glomsrød, S. and Shi, Q., 2014. Bioenergy consumption in rural China: Evidence from a survey in three provinces. Energy policy, 75, pp.136-145.	1	2014	Q	English
97	Liu, T., Marlier, M.E., Karambelas, A., Jain, M., Singh, S., Singh, M.K., Gautam, R. and DeFries, R.S., 2019. Missing emissions from post-monsoon agricultural fires in northwestern India: regional limitations of MODIS burned area and active fire products. Environmental Research Communications, 1(1), p.011007.	1	2019	R; Q	English
98	Kumar, P., Kumar, S. and Joshi, L., 2015. Socioeconomic and environmental implications of agricultural residue burning: a case study of Punjab, India. Springer Nature.	1	2015	I; Q	English
99.i	Chokkalingam, U., Tacconi, L. and Ruchiat, Y., 2001, Fire use, peatland transformation and local livelihoods: a case of positive reinforcement. In Peatland for people: Natural resource functions and sustainable management. Proceedings of the international symposium on tropical peatlands. BPPT and Indonesian Peat Association, Jakarta (pp. 191-196).	2	2001	R; Q; E	English
99.ii	Chokkalingam, U., Kurniawan, I. and Ruchiat, Y., 2005. Fire, livelihoods, and environmental change in the middle Mahakam peatlands, East Kalimantan. Ecology and Society, 10(1).	2	2005	R; S; I; E; P	English
100	Luoga, E.J., Witkowski, E.T.F. and Balkwill, K., 2000. Subsistence use of wood products and shifting cultivation within a miombo woodland of eastern Tanzania, with some notes on commercial uses. South African Journal of Botany, 66(1), pp.72-85.	1	2000	Q	English
101	Mwampamba, T.H. and Schwartz, M.W., 2011. The effects of cultivation history on forest recovery in fallows in the Eastern Arc Mountains, Tanzania. Forest Ecology and Management, 261(6), pp.1042-1052.	1	2011	S; I	English
102	Itani, J., 2007. Effects of socio-economic changes on cultivation systems under customary land tenure in Mbozi District, southern Tanzania. African Study Monographs, Suppl.34: 57-74	1	2007	U	English
103	Grogan, K., Birch-Thomsen, T. and Lyimo, J., 2013. Transition of shifting cultivation and its impact on people’s livelihoods in the Miombo Woodlands of Northern Zambia and South-Western Tanzania. Human Ecology, 41(1), pp.77-92.	1	2013	Q; F; I	English
104	Hume, D.W., 2006. Swidden agriculture and conservation in eastern Madagascar: stakeholder perspectives and cultural belief systems. Conservation and Society, pp.287-303.	1	2006	I	English
105	Vosti, S.A., Witcover, J. and Carpentier, C.L., 2002. Agricultural intensification by smallholders in the western Brazilian Amazon: from deforestation to sustainable land use (Vol. 130). Intl Food Policy Res Inst.	1	2002	Q; I	English
106	Sirén, A.H., 2007. Population growth and land use intensification in a subsistence-based indigenous community in the Amazon. Human Ecology, 35(6), pp.669-680.	1	2007	S; I; R	English
107	De Rouw, A., Casagrande, M., Phaynaxay, K., Soulileuth, B. and Saito, K., 2014. Soil seedbanks in slash‐and‐burn rice fields of northern Laos. Weed Research, 54(1), pp.26-37.	1	2014	S	English
108.i	Roder, W., Phengchanh, S. and Keobulapha, B., 1997. Weeds in slash‐and‐burn rice fields in northern Laos. Weed Research, 37(2), pp.111-119.	2	1997	Q; I; S	English
108.ii	Roder, W., 2001. Slash-and-burn Rice Systems in the Hills of Northern Lao PDR: Description, Challenges, and Opportunities. Int. Rice Res. Inst.	2	2001	Q; S	English
109	Linquist, B., Trösch, K., Pandey, S., Phouynyavong, K. and Guenat, D., 2007. Montane paddy rice: Development and effects on food security and livelihood activities of highland Lao farmers. Mountain Research and Development, 27(1), pp.40-47.	1	2007	P; Q	English
110	Watanabe, E., Sakurai, K., Okabayashi, Y., Nouanthasing, L. and Chanphengxay, A., 2004. Soil fertility and farming systems in a slash and burn cultivation area of Northern Laos. Japanese Journal of Southeast Asian Studies, 41(4), pp.519-537.	1	2004	I; S	English
111	Yokoyama, S., 2004. Forest, ethnicity and settlement in the mountainous area of northern Laos. Japanese Journal of Southeast Asian Studies, 42(2), pp.132-156.	1	2004	I; Q	English
112	Seidenberg, C., Mertz, O. and Kias, M.B., 2003. Fallow, labour and livelihood in shifting cultivation: implications for deforestation in northern Lao PDR. Geografisk Tidsskrift-Danish Journal of Geography, 103(2), pp.71-80.	1	2003	Q; R	English
113	Edivaldo, T. and Rosell, S., 2020. Slash-and-burn agriculture in southern Brazil: characteristics, food production and prospects. Scottish Geographical Journal, pp.1-19.	1	2020	A; I	English
114	Nyamadzawo, G., Gwenzi, W., Kanda, A., Kundhlande, A. and Masona, C., 2013. Understanding the causes, socio-economic and environmental impacts, and management of veld fires in tropical Zimbabwe. Fire science reviews, 2(1), p.2.	1	2013	A; I; E	English
115	Nyamadzawo, G., Wuta, M., Nyamangara, J., Nyamugafata, P. and Chirinda, N., 2015. Optimizing dambo (seasonal wetland) cultivation for climate change adaptation and sustainable crop production in the smallholder farming areas of Zimbabwe. International Journal of Agricultural Sustainability, 13(1), pp.23-39.	1	2015	A; Q; E	English
116	Kamoshita, A., Araki, Y. and Nguyen, Y.T., 2014. Weed biodiversity and rice production during the irrigation rehabilitation process in Cambodia. Agriculture, ecosystems & environment, 194, pp.1-6.	1	2014	I; S; F; Q	English
117	Urgenson, L., Schmidt, A.H., Combs, J., Harrell, S., Hinckley, T., Yang, Q., Ma, Z., Yongxian, L., Hongliang, L. and MacIver, A., 2014. Traditional livelihoods, conservation and meadow ecology in Jiuzhaigou National Park, Sichuan, China. Human Ecology, 42(3), pp.481-491.	1	2014	I; R; O	English	Archaeological research
118.i	Bremer, L.L., 2012. Land-use change, ecosystem services, and local livelihoods: ecological and socioeconomic outcomes of payment for ecosystem services in Ecuadorian páramo grasslands, PhD thesis, University of California, Santa Barbara.	2	2012	I; A; E; S	English
118.ii	Bremer, L.L., Farley, K.A., Lopez-Carr, D. and Romero, J., 2014. Conservation and livelihood outcomes of payment for ecosystem services in the Ecuadorian Andes: what is the potential for ‘win–win’?. Ecosystem Services, 8, pp.148-165.	2	2014	I	English
119	Medrilzam, M., Dargusch, P., Herbohn, J. and Smith, C., 2014. The socio-ecological drivers of forest degradation in part of the tropical peatlands of Central Kalimantan, Indonesia. Forestry, 87(2), pp.335-345.	1	2014	P; I; E	English
120	Kamau, P.N. and Medley, K.E., 2014. Anthropogenic fires and local livelihoods at Chyulu Hills, Kenya. Landscape and Urban Planning, 124, pp.76-84.	1	2014	F; I	English
121.i	Coughlan, M.R., 2013. Errakina: pastoral fire use and landscape memory in the Basque region of the French Western Pyrenees. Journal of Ethnobiology, 33(1), pp.86-104.	2	2013	E; A; R; I; Q; S	English
121.ii	Coughlan, M.R., 2014. Farmers, flames, and forests: historical ecology of pastoral fire use and landscape change in the French Western Pyrenees, 1830–2011. Forest Ecology and Management, 312, pp.55-66.	2	2014	A; R	English
122	Sharma, L.N., Vetaas, O.R., Chaudhary, R.P. and Måren, I.E., 2014. Pastoral abandonment, shrub proliferation and landscape changes: a case study from Gorkha, Nepal. Landscape Research, 39(1), pp.53-69.	1	2014	I; F	English
123	Babai, D. and Molnár, Z., 2014. Small-scale traditional management of highly species-rich grasslands in the Carpathians. Agriculture, Ecosystems & Environment, 182, pp.123-130.	1	2014	I; E	English
124.i	Marquardt, K., Milestad, R. and Salomonsson, L., 2013. Improved fallows: a case study of an adaptive response in Amazonian swidden farming systems. Agriculture and Human Values, 30(3), pp.417-428.	2	2013	I; P	English
124.ii	Marquardt, K., Milestad, R. and Porro, R., 2013. Farmers’ perspectives on vital soil-related ecosystem services in intensive swidden farming systems in the Peruvian Amazon. Human Ecology, 41(1), pp.139-151.	2	2013	I; P	English
125	Meddour-Sahar, O., Meddour, R., Leone, V., Lovreglio, R. and Derridj, A., 2013. Analysis of forest fires causes and their motivations in northern Algeria: the Delphi method. iForest-Biogeosciences and Forestry, 6(5), p.247.	1	2013	O	English	Delphi method
126.i	Carmenta, R., Vermeylen, S., Parry, L. and Barlow, J., 2013. Shifting cultivation and fire policy: insights from the Brazilian Amazon. Human ecology, 41(4), pp.603-614.	2	2013	E; I; P; A	English
126.ii	Carmenta, R. 2013. From earth observation to ethnography: examining smallholder fire management in the Brazilian Amazon. PhD thesis, Unviersity of Lancaster.	2	2013	E; I; P; A	English
127	Krug, M., Schlecht, E. and Buerkert, A., 2013. Agricultural sustainability and food security of Jhum systems in Nagaland, NE India. Outlook on Agriculture, 42(2), pp.133-139.	1	2013	I	English
128.i	de Melo, M. M., and Saito, C. H. 2013. The practice of burning savannas for hunting by the Xavante Indians based on the stars and constellations. Society & Natural Resources, 26(4), 478-487.	3	2013	I; F	English
128.ii	de Melo, M.M. and Saito, C.H., 2011. Regime de queima das caçadas com uso do fogo realizadas pelos Xavante no cerrado. Biodiversidade Brasileira-BioBrasil, (2), pp.97-109.	3	2011	I	Portuguese
128.iii	de Melo, M.M., 2011. A confluência entre a ecologia do fogo e o conhecimento Xavante sobre o manejo do fogo no Cerrado. PhD thesis, Universidade de Brasilia.	3	2011	I; F	Portuguese
129	Anderson, M.K. and Lake, F.K., 2013. California Indian ethnomycology and associated forest management. Journal of Ethnobiology, 33(1), pp.33-85.	1	2013	I; A	English
130.i	Schmook, B., 2010. Shifting maize cultivation and secondary vegetation in the Southern Yucatán: successional forest impacts of temporal intensification. Regional Environmental Change, 10(3), pp.233-246.	2	2010	S; Q	English
130.ii	Schmook, B., van Vliet, N., Radel, C., de Jesús Manzón-Che, M. and McCandless, S., 2013. Persistence of swidden cultivation in the face of globalization: a case study from communities in Calakmul, Mexico. Human Ecology, 41(1), pp.93-107.	2	2013	Q; I; E; P; F	English
131	Kaushal, L.A. and Prashar, A., 2020. Agricultural crop residue burning and its environmental impacts and potential causes–case of northwest India. Journal of Environmental Planning and Management, pp.1-21.	1	2020	I; F	English
132	Adams, C., Munari, L.C., Van Vliet, N., Murrieta, R.S.S., Piperata, B.A., Futemma, C., Pedroso, N.N., Taqueda, C.S., Crevelaro, M.A. and Spressola-Prado, V.L., 2013. Diversifying incomes and losing landscape complexity in Quilombola shifting cultivation communities of the Atlantic rainforest (Brazil). Human Ecology, 41(1), pp.119-137.	1	2013	Q; E; I; S	English
133.i	Christianson, A.N., 2011. Wildfire risk perception and mitigation at Peavine Métis Settlement. PhD thesis, University of Alberta.	2	2011	E; I; F; P	English
133.ii	Christianson, A.N., McGee, T.K. and L’Hirondelle, L., 2013. How historic and current wildfire experiences in an Aboriginal community influence mitigation preferences. International Journal of Wildland Fire, 22(4), pp.527-536.	2	2013	P; I; F	English
134	Lineal, M. and Laituri, M., 2013. Community-based integrated fire management planning: linking ecology and society in Honduras. Community Development Journal, 48(1), pp.58-74.	1	2013	E; P	English
135	Ramcilovic-Suominen, S. and Hansen, C.P., 2012. Why some forest rules are obeyed and others violated by farmers in Ghana: instrumental and normative perspective of forest law compliance. Forest Policy and Economics, 23, pp.46-54.	1	2012	I	English
136	Tsujimoto, Y., Homma, K., Matsuyama, H. and Shiraiwa, T., 2012. Land-use strategies of farmers in responding to rising land-use pressures in the southeastern forest region of Madagascar: a comparative study between lowland households and hillside households. Japan Agricultural Research Quarterly: JARQ, 46(3), pp.249-256.	1	2012	I; R	English
137	Mertz, O.L.E., Birch‐Thomsen, T, Elberling, B.O., Rothausen, S., Bruun, T.B., Reenberg, A., Fog, B., Egsmose, R.M. and Breuning‐Madsen, H., 2012. Changes in shifting cultivation systems on small Pacific islands. The Geographical Journal, 178(2), pp.175-187.	1	2012	Q; I; R; F; S	English
138.i	Lestrelin, G. and Giordano, M., 2007. Upland development policy, livelihood change and land degradation: interactions from a Laotian village. Land Degradation & Development, 18(1), pp.55-76.	2	2007	Q; I; F; P; A	English
138.ii	Lestrelin, G., Vigiak, O., Pelletreau, A., Keohavong, B. and Valentin, C., 2012. Challenging established narratives on soil erosion and shifting cultivation in Laos. Natural resources forum, 36(2), pp. 63-75.	2	2012	S; Q; I; F	English
139	Hariyadi, B. and Ticktin, T., 2012. From shifting cultivation to Cinnamon agroforestry: changing agricultural practices among the Serampas in the Kerinci Seblat National Park, Indonesia. Human Ecology, 40(2), pp.315-325.	1	2012	E; I	English
140	Daud, A., Rahim, K.A., Shamsudin, M.N. and Shuib, A., 2012. The willingness to pay for better environment: the case of pineapple cultivation on peat soil in Samarahan, Sarawak. In Proceedings of USM-AUT International Conference 2012 Sustainable Economic Development: Policies and Strategies (Vol. 167, p. 635).	1	2012	Q	English
141	Scales, I.R., 2011. Farming at the forest frontier: land use and landscape change in Western Madagascar, 1896-2005. Environment and history, 17(4), pp.499-524.	1	2011	A; R; I; Q; P	English
142.i	Gil-Romera, G., Turton, D. and Sevilla-Callejo, M., 2011. Landscape change in the lower Omo valley, southwestern Ethiopia: burning patterns and woody encroachment in the savanna. Journal of Eastern African Studies, 5(1), pp.108-128.	2	2011	I; S	English
142.ii	Gil-Romera, G., Lamb, H.F., Turton, D., Sevilla-Callejo, M. and Umer, M., 2010. Long-term resilience, bush encroachment patterns and local knowledge in a Northeast African savanna. Global Environmental Change, 20(4), pp.612-626.	2	2010	I; S	English
143	Aguilar-Jiménez, C.E., Tolón-Becerra, A. and Lastra-Bravo, X.B., 2011. Agri-environmental evaluation of traditional and alternative corn production systems in Chiapas, Mexico. Journal of Agriculture and Rural Development in the Tropics and Subtropics (JARTS), 112(2), pp.71-86.	1	2011	S	English
144.i	Miller, A.M., Davidson-Hunt, I.J. and Peters, P., 2010. Talking about fire: Pikangikum First Nation elders guiding fire management. Canadian Journal of Forest Research, 40(12), pp.2290-2301.	3	2010	I; P; F	English
144.ii	Miller, A.M. and Davidson-Hunt, I., 2010. Fire, agency and scale in the creation of aboriginal cultural landscapes. Human Ecology, 38(3), pp.401-414.	3	2010	I; P; F; E	English
144.iii	Miller, A.M., 2010. Living with boreal forest fires: Anishinaabe perspectives on disturbance and collaborative forestry planning, Pikangikum First Nation, northwestern Ontario. PhD thesis, University of Manitoba.	3	2010	I; P; F; E	English
145	McGregor, S., Lawson, V., Christophersen, P., Kennett, R., Boyden, J., Bayliss, P., Liedloff, A., McKaige, B. and Andersen, A.N., 2010. Indigenous wetland burning: conserving natural and cultural resources in Australia’s World Heritage-listed Kakadu National Park. Human Ecology, 38(6), pp.721-729.	1	2010	E; P	English
146	Ascoli, D. and Bovio, G., 2010. Tree encroachment dynamics in heathlands of north-west Italy: the fire regime hypothesis. iForest-Biogeosciences and Forestry, 3(5), p.137.	1	2010	S; R	English
147	Lovreglio, R., Leone, V., Giaquinto, P. and Notarnicola, A., 2010. Wildfire cause analysis: four case-studies in southern Italy. iForest-Biogeosciences and Forestry, 3(1), p.8.	1	2010	O	English	Delphi method
148.i	Bilbao, B.A., Leal, A.V. and Méndez, C.L., 2010. Indigenous use of fire and forest loss in Canaima National Park, Venezuela. Assessment of and tools for alternative strategies of fire management in Pemón indigenous lands. Human Ecology, 38(5), pp.663-673.	4	2010	S; E	English
148.ii	Eloy, L., A. Bilbao, B., Mistry, J. and Schmidt, I.B., 2019. From fire suppression to fire management: advances and resistances to changes in fire policy in the savannas of Brazil and Venezuela. The Geographical Journal, 185(1), pp.10-22.	4	2019	E; A	English
148.iii	Rodríguez, I., Sletto, B., Bilbao, B., Sánchez-Rose, I. and Leal, A., 2018. Speaking of fire: reflexive governance in landscapes of social change and shifting local identities. Journal of Environmental Policy & Planning, 20(6), pp.689-703.	4	2018	E; P	English
148.iv	Bilbao, B., Mistry, J., Millán, A. and Berardi, A., 2019. Sharing multiple perspectives on burning: towards a participatory and intercultural fire management policy in Venezuela, Brazil, and Guyana. Fire, 2(3), p.39.	4	2019	P	English
149.i	Rodríguez, I., 2004. Conocimiento indígena vs científico: el conflicto por el uso del fuego en el parque nacional Canaima, Venezuela. Interciencia, 29(3), pp.121-129.	4	2004	P; I; A	Spanish
149.ii	Rodríguez, I., 2007. Pemon perspectives of fire management in Canaima National Park, southeastern Venezuela. Human Ecology, 35(3), pp.331-343.	4	2007	P; I; A	English
149.iii	Rodriguez, I., 2017. Linking well-being with cultural revitalization for greater cognitive justice in conservation. Ecology and Society, 22(4).	4	2017	P; I; E	English
149.iv	Rodríguez, I., Sletto, B., Bilbao, B., Sánchez-Rose, I. and Leal, A., 2018. Speaking of fire: reflexive governance in landscapes of social change and shifting local identities. Journal of Environmental Policy & Planning, 20(6), pp.689-703.	4	2018	E; P	English
150.i	Sletto, B.I., 2006. Burn marks: the becoming and unbecoming of an indigenous landscape. PhD thesis, Cornell University.	6	2006	P; E; I; S; A	English
150.ii	Sletto, B., 2008. The knowledge that counts: institutional identities, policy science, and the conflict over fire management in the Gran Sabana, Venezuela. World Development, 36(10), pp.1938-1955.	6	2008	P; E	English
150.iii	Sletto, B., 2009. Indigenous people don't have boundaries': reborderings, fire management, and productions of authenticities in indigenous landscapes. Cultural Geographies, 16(2), pp.253-277.	6	2009	P; E	English
150.iv	Sletto, B., 2010. The mythical forest, the becoming-desert: environmental knowledge production and the iconography of destruction in the Gran Sabana, Venezuela. Environment and Planning D: Society and Space, 28(4), pp.672-690.	6	2010	P; E	English
150.v	Sletto, B., 2011. Conservation planning, boundary-making and border terrains: The desire for forest and order in the Gran Sabana, Venezuela. Geoforum, 42(2), pp.197-210.	6	2011	I; E; A; S	English
150.vi	Rodríguez, I., Sletto, B., Bilbao, B., Sánchez-Rose, I. and Leal, A., 2018. Speaking of fire: reflexive governance in landscapes of social change and shifting local identities. Journal of Environmental Policy & Planning, 20(6), pp.689-703.	6	2018	E; P	English
151	Carroll, M.S., Cohn, P.J., Paveglio, T.B., Drader, D.R. and Jakes, P.J., 2010. Fire burners to firefighters: the Nez Perce and fire. Journal of Forestry, 108(2), pp.71-76.	1	2010	I	English
151.ii	Shaffer, L.J., 2010. Indigenous fire use to manage savanna landscapes in southern Mozambique. Fire Ecology, 6(2), pp.43-59.	2	2010	E; I	English
151.ii	Shaffer, L. J. 2009. Human-environment interactions on a coastal forest-savanna mosaic in southern Mozambique. PhD thesis, University of Georgia.	2	2009	E; I	English
152	Wyndham, F.S., 2009. Spheres of relations, lines of interaction: subtle ecologies of the Rarámuri landscape in northern Mexico. Journal of Ethnobiology, 29(2), pp.271-295.	1	2009	E	English
153.i	Sorrensen, C.L., 2000. Linking smallholder land use and fire activity: examining biomass burning in the Brazilian Lower Amazon. Forest Ecology and Management, 128(1-2), pp.11-25.	2	2000	S; R; I	English
153.ii	Sorrensen, C., 2004. Contributions of fire use study to land use/cover change frameworks: understanding landscape change in agricultural frontiers. Human Ecology, 32(4), pp.395-420.	2	2004	I	English
154	Robichaud, W.G., Sinclair, A.R., Odarkor-Lanquaye, N. and Klinkenberg, B., 2009. Stable forest cover under increasing populations of swidden cultivators in central Laos: the roles of intrinsic culture and extrinsic wildlife trade. Ecology and Society, 14(1).	1	2009	R; I; A; E	English
155	Xu, J., Lebel, L. and Sturgeon, J., 2009. Functional links between biodiversity, livelihoods, and culture in a Hani swidden landscape in southwest China. Ecology and Society, 14(2).	1	2009	I; R; S; Q	English
156.i	Butz, R.J., 2009. Traditional fire management: historical fire regimes and land use change in pastoral East Africa. International Journal of Wildland Fire, 18(4), pp.442-450.	4	2009	I; F; E	English
156.ii	Butz, R.J., 2013. Changing land management: A case study of charcoal production among a group of pastoral women in northern Tanzania. Energy for Sustainable Development, 17(2), pp.138-145.	4	2013	I; F; E	English
156.iii	Butz, R.J., 2007. Fire in a Semi-arid African savanna: pastoral management practices and ecological effects. PhD thesis, University of California, Davis.	4	2007	I; F; E	English
156.iv	Butz, R.J., 2018. Fire in the African savanna: identifying challenges to traditional burning practices in Tanzania and Malawi. In C. T. Fowler and J. R. Welch (Eds.) Fire otherwise: ethnobiology of burning for a changing world, pp. 63-81. The University of Utah Press.	4	2018	I; F; E	English
157	Trusler, S. and Johnson, L.M., 2008. “Berry patch” as a kind of place—the ethnoecology of black huckleberry in northwestern Canada. Human Ecology, 36(4), pp.553-568.	1	2008	I; E; R; S	English
158.i	Mathews, A.S., 2005. Power/knowledge, power/ignorance: forest fires and the state in Mexico. Human Ecology, 33(6), pp.795-820.	4	2005	A; I; E	English
158.ii	Mathews, A.S., 2003. Suppressing fire and memory: environmental degradation and political restoration in the Sierra Juarez of Oaxaca, 1887-2001. Environmental History, pp.77-108.	4	2003	A; I; E	English
158.iii	Mathews, A.S., 2008. State making, knowledge, and ignorance: translation and concealment in Mexican forestry institutions. American Anthropologist, 110(4), pp.484-494.	4	2008	A; I; E	English
158.iv	Mathews, A.S., 2011. Instituting nature: authority, expertise, and power in Mexican forests. MIT Press.	4	2011	A; I; E	English
159	Awanyo, L., 2008. Dealing with weedy problems in agriculture: the role of three agricultural land use management practices in the forest‐savanna ecological zone of Ghana. Area, 40(4), pp.446-458.	1	2008	Q; I; S	English
160	Whitehead, P.J., Purdon, P., Russell‐Smith, J., Cooke, P.M. and Sutton, S., 2008. The management of climate change through prescribed savanna burning: emerging contributions of indigenous people in northern Australia. Public Administration and Development: The International Journal of Management Research and Practice, 28(5), pp.374-385.	1	2008	U	English
161	Bowman, M.S., Amacher, G.S. and Merry, F.D., 2008. Fire use and prevention by traditional households in the Brazilian Amazon. Ecological Economics, 67(1), pp.117-130.	1	2008	Q	English
162	Angassa, A. and Oba, G., 2008. Herder perceptions on impacts of range enclosures, crop farming, fire ban and bush encroachment on the rangelands of Borana, Southern Ethiopia. Human Ecology, 36(2), pp.201-215.	1	2008	I; Q	English
163	Lojka, B., Lojkova, J., Banout, J., Polesny, Z. and Preininger, D., 2008. Performance of an improved fallow system in the Peruvian Amazon—modelling approach. Agroforestry Systems, 72(1), pp.27-39.	1	2008	Q; S	English
164	Mallol, C., Marlowe, F.W., Wood, B.M. and Porter, C.C., 2007. Earth, wind, and fire: ethnoarchaeological signals of Hadza fires. Journal of Archaeological Science, 34(12), pp.2035-2052.	1	2007	E	English
164.ii	Eriksen, C., 2007. Why do they burn the ‘bush’? Fire, rural livelihoods, and conservation in Zambia. Geographical Journal, 173(3), pp.242-256.	2	2007	P; I; E; F	English
164.ii	Eriksen, C. 2010. Playing with fire? Bushfire and everyday life in changing rural landscapes. PhD thesis, University of Wollongong.	2	2010	P; I; E; F	English
165	Chalmers, N. and Fabricius, C., 2007. Expert and generalist local knowledge about land-cover change on South Africa’s Wild Coast: can local ecological knowledge add value to science?. Ecology and Society, 12(1).	1	2007	I; R	English
166	Shriar, A.J., 2007. In search of sustainable land use and food security in the arid hillside regions of Central America: putting the horse before the cart. Human Ecology, 35(3), pp.275-287.	1	2007	E; I; A	English
167	Russell-Smith, J., Djoeroemana, S., Maan, J. and Pandanga, P., 2007. Rural livelihoods and burning practices in savanna landscapes of Nusa Tenggara Timur, eastern Indonesia. Human Ecology, 35(3), pp.345-359.	1	2007	I; Q; F; P; E; S	English
168	Klein, J.R., Reau, B., Kalland, I. and Edwards, M., 2007. Conservation, development, and a heterogeneous community: The case of Ambohitantely Special Reserve, Madagascar. Society and Natural Resources, 20(5), pp.451-467.	1	2007	E; I; F; A	English
169	Styger, E., Rakotondramasy, H.M., Pfeffer, M.J., Fernandes, E.C. and Bates, D.M., 2007. Influence of slash-and-burn farming practices on fallow succession and land degradation in the rainforest region of Madagascar. Agriculture, Ecosystems & Environment, 119(3-4), pp.257-269.	1	2007	I	English
170	Tschakert, P., Coomes, O.T. and Potvin, C., 2007. Indigenous livelihoods, slash-and-burn agriculture, and carbon stocks in Eastern Panama. Ecological Economics, 60(4), pp.807-820.	1	2007	Q; P; S	English
171.i	Schmerbeck, J., 2003. Patterns of forest use and its influence on degraded dry forests: A case study in Tamil Nadu, South India. PhD thesis, Technische Universität München.	2	2003	E; I	English
171.ii	Schmerbeck, J. and Seeland, K., 2007. Fire supported forest utilisation of a degraded dry forest as a means of sustainable local forest management in Tamil Nadu/South India. Land Use Policy, 24(1), pp.62-71.	2	2007	E; I	English
172	Brown, D.R., 2006. Personal preferences and intensification of land use: their impact on southern Cameroonian slash-and-burn agroforestry systems. Agroforestry Systems, 68(1), pp.53-67.	1	2006	I; O	English	A game was used as part of the interview
173.i	Davidson-Hunt, I.J., 2003. Journeys, plants and dreams: adaptive learning and social-ecological resilience. PhD thesis, The University of Manitoba.	3	2003	P; E; I; S; A	English
173.ii	Davidson-Hunt, I.J., 2003. Indigenous lands management, cultural landscapes and Anishinaabe people of Shoal Lake, Northwestern Ontario, Canada. Environments, 31(1), pp.21-42	3	2003	P; E; I; S; A	English
173.iii	Berkes, F. and Davidson‐Hunt, I.J., 2006. Biodiversity, traditional management systems, and cultural landscapes: examples from the boreal forest of Canada. International Social Science Journal, 58(187), pp.35-47.	3	2006	P; E; I; S; A	English
174	Tacconi, L. and Ruchiat, Y., 2006. Livelihoods, fire and policy in eastern Indonesia. Singapore Journal of Tropical Geography, 27(1), pp.67-81.	1	2006	I; P; F	English
175	Eastmond, A. and Faust, B., 2006. Farmers, fires, and forests: a green alternative to shifting cultivation for conservation of the Maya forest?. Landscape and urban planning, 74(3-4), pp.267-284.	1	2006	I; P	English
176	Dalle, S.P. and de Blois, S., 2006. Shorter fallow cycles affect the availability of noncrop plant resources in a shifting cultivation system. Ecology and Society, 11(2).	1	2006	S; I	English
177	Dugast, S., 2006. Des sites sacrés à incendier. Feux rituels et bosquets sacrés chez les Bwaba du Burkina Faso et les Bassar du Togo. Anthropos, 101(2), pp.413-427.	1	2006	E	French
178	McDaniel, J., Kennard, D. and Fuentes, A., 2005. Smokey the tapir: traditional fire knowledge and fire prevention campaigns in lowland Bolivia. Society and Natural Resources, 18(10), pp.921-931.	1	2005	E; I	English
179.i	Dennis, R.A., Mayer, J., Applegate, G., Chokkalingam, U., Colfer, C.J.P., Kurniawan, I., Lachowski, H., Maus, P., Permana, R.P., Ruchiat, Y. and Stolle, F., 2005. Fire, people and pixels: linking social science and remote sensing to understand underlying causes and impacts of fires in Indonesia. Human Ecology, 33(4), pp.465-504.	9	2005	R; P; I; Q; E	English
179.ii	Suyanto, S., Dennis, R., Kurniawan,I. Stolle, F., Maus, P. and Applegate, G. 2000. The underlying causes and impacts of fires in South-east Asia. Site 1. Sekincau. CIFOR, ICRAF, PPSDAK—Pancur Kasih, USFS, Bogor, Indonesia.	9	2000	R; P; I; Q; E	English
179.iii	Suyanto, S., Dennis, R.A., Ruchiat, Y., Kurniawan, I., Stolle, F., Maus, P. and Applegate, G. 2000. The underlying causes and impacts of fires in South-east Asia. Site 2. Menggala. CIFOR, ICRAF, PPSDAK—Pancur Kasih, USFS, Bogor, Indonesia.	9	2000	R; P; I; Q; E	English
179.iv	Suyanto, S., Ruchiat, Y., Stolle, F. and Applegate, G. 2000. The underlying causes and impacts of fires in South-east Asia. Site 3. Tanah Tumbuh. CIFOR, ICRAF, PPSDAK—Pancur Kasih, USFS, Bogor, Indonesia.	9	2000	R; P; I; Q; E	English
179.v	Dennis, R.A., Suyanto, S., Permana, R.P., Ruchiat, Y., Kurniawan, I., Stolle, F., Maus, P. and Applegate, G. 2000. The underlying causes and impacts of fires in South-east Asia. Site 4. Musi Banyu Asin. CIFOR, ICRAF, PPSDAK—Pancur Kasih, USFS, Bogor, Indonesia.	9	2000	R; P; I; Q; E	English
179.vi	Dennis, R.A., Erman, A., Stolle, S.F. and Applegate, G. 2000. The underlying causes and impacts of fires in South-east Asia. Site 5. Danau Sentarum. CIFOR, ICRAF, PPSDAK—Pancur Kasih, USFS, Bogor, Indonesia.	9	2000	R; P; I; Q; E	English
179.vii	Mayer, J. and Suratmoko, B. 2000. The underlying causes and impacts of fires in South-east Asia. Site 6. Sanggau. CIFOR, ICRAF, PPSDAK—Pancur Kasih, USFS, Bogor, Indonesia.	9	2000	R; P; I; Q; E	English
179.vii	Suyanto, S.W., Ruchiat, Y., Erman, A., Maus, P., Stolle, S.F., Hadi, D.P., Dennis, R.A. and Applegate, G. 2000. The underlying causes and impacts of fires in South-east Asia. Site 7. Tumbang Titi. CIFOR, ICRAF, PPSDAK—Pancur Kasih, USFS, Bogor, Indonesia.	9	2000	R; P; I; Q; E	English
179.ix	Colfer, C.J.P, Dennis, R.A. and Applegate, G. 2000. The underlying causes and impacts of fires in South-east Asia. Site 8. Long Segar. CIFOR, ICRAF, PPSDAK—Pancur Kasih, USFS, Bogor, Indonesia.	9	2000	R; P; I; Q; E	English
180	Chokkalingam, U., Permana, R.P., Kurniawan, I., Mannes, J., Darmawan, A., Khususyiah, N. and Susanto, R.H., 2007. Community fire use, resource change, and livelihood impacts: The downward spiral in the wetlands of southern Sumatra. Mitigation and Adaptation Strategies for Global Change, 12(1), pp.75-100.	1	2007	P; F; R; S; I	English
181	Suyanto, S., Applegate, G., Permana, R.P., Khususiyah, N. and Kurniawan, I., 2004. The role of fire in changing land use and livelihoods in Riau-Sumatra. Ecology and Society, 9(1).	1	2004	P; R; I; S	English
182	Mistry, J., 1998. Decision-making for fire use among farmers in savannas: an exploratory study in the Distrito Federal, central Brazil. Journal of environmental Management, 54(4), pp.321-334.	1	1998	A; I; P; E	English
183	Mistry, J., Berardi, A., Andrade, V., Krahô, T., Krahô, P. and Leonardos, O., 2005. Indigenous fire management in the cerrado of Brazil: the case of the Krahô of Tocantíns. Human ecology, 33(3), pp.365-386.	1	2005	I; F; E	English
184	Ducourtieux, O., Laffort, J.R. and Sacklokham, S., 2005. Land policy and farming practices in Laos. Development and Change, 36(3), pp.499-526.	1	2005	I; E	English
185	Hoare, P., 2004. A process for community and government cooperation to reduce the forest fire and smoke problem in Thailand. Agriculture, ecosystems & environment, 104(1), pp.35-46.	1	2004	R; O	English	Author seems to have been involved in the Project described in the paper, so the study findings must relate to the Project activities, but there is no clear methodology outlined in the paper
186	Russell-Smith, J., Lucas, D., Gapindi, M., Gunbunuka, B., Kapirigi, N., Namingum, G., Lucas, K., Giuliani, P. and Chaloupka, G., 1997. Aboriginal resource utilization and fire management practice in western Arnhem Land, monsoonal northern Australia: notes for prehistory, lessons for the future. Human Ecology, 25(2), pp.159-195.	1	1997	E; A; I	English
187.i	Hill, R., Baird, A. and Buchanan, D., 1999. Aborigines and fire in the Wet Tropics of Queensland, Australia: ecosystem management across cultures. Society & Natural Resources, 12(3), pp.205-223.	2	1999	A; I	English
187.ii	Hill, R. and Baird, A., 2003. Kuku—Yalanji rainforest Aboriginal people and carbohydrate resource management in the Wet Tropics of Queensland, Australia. Human Ecology, 31(1), pp.27-52.	2	2003	I; A; S	English
188	Yibarbuk, D., Whitehead, P.J., Russell‐Smith, J., Jackson, D., Godjuwa, C., Fisher, A., Cooke, P., Choquenot, D. and Bowman, D.M., 2001. Fire ecology and Aboriginal land management in central Arnhem Land, northern Australia: a tradition of ecosystem management. Journal of Biogeography, 28(3), pp.325-343.	1	2001	S; P; E; I	English
189	Garde, M., 2009. The language of fire: seasonality, resources and landscape burning on the Arnhem Land Plateau. In J Russell-Smith, P Whitehead, P Cooke (Eds.) ‘Culture, ecology and economy of savanna fire management in northern Australia: rekindling the Wurrk tradition’, pp. 85-164	1	2009	E; I	English
190	Fischer, A. and Vasseur, L., 2002. Smallholder perceptions of agroforestry projects in Panama. Agroforestry systems, 54(2), pp.103-113.	1	2002	I	English
191	Lake, F.K., 2007. Traditional ecological knowledge to develop and maintain fire regimes in northwestern California, Klamath-Siskiyou bioregion: management and restoration of culturally significant habitats. PhD thesis, Oregon State University	1	2007	A; I; S; R	English	Source combines historical ethnographic texts and oral histories, so it is not clear how much of what is described is in living memory
192	Neill, S.P. and Lee, D.R., 2001. Explaining the adoption and disadoption of sustainable agriculture: the case of cover crops in northern Honduras. Economic development and cultural change, 49(4), pp.793-820.	1	2001	Q	English
193	Mbow, C., Nielsen, T.T. and Rasmussen, K., 2000. Savanna fires in east-central Senegal: distribution patterns, resource management and perceptions. Human Ecology, 28(4), pp.561-583.	1	2000	R; I; F	English
194	Levasseur, V. and Olivier, A., 2000. The farming system and traditional agroforestry systems in the Maya community of San Jose, Belize. Agroforestry systems, 49(3), pp.275-288.	1	2000	E; I; S	English
195	Fernández‐Santos, B., Gómez‐Gutiérrez, J.M. and Moreno‐Marcos, G., 1999. Effects of disturbance caused by traditional Spanish rural land use on the regeneration of Cytisus multiflorus. Applied Vegetation Science, 2(2), pp.239-250.	1	1999	S	English
196	Wilkie, D., Morelli, G., Rotberg, F. and Shaw, E., 1999. Wetter isn't better: global warming and food security in the Congo Basin. Global Environmental Change, 9(4), pp.323-328.	1	1999	Q	English
197.i	Ketterings, Q.M., Wibowo, T.T., van Noordwijk, M. and Penot, E., 1999. Farmers' perspectives on slash-and-burn as a land clearing method for small-scale rubber producers in Sepunggur, Jambi Province, Sumatra, Indonesia. Forest Ecology and Management, 120(1-3), pp.157-169.	2	1999	Q	English
197.ii	Ketterings, Q.M., 2000. Fire as a land management tool in Sepunggur, Sumatra, Indonesia. Can farmers do without it? PhD thesis, The Ohio State University.	2	2000	S; I	English
198	Bloesch, U., 1999. Fire as a tool in the management of a savanna/dry forest reserve in Madagascar. Applied Vegetation Science, 2(1), pp.117-124.	1	1999	O	English	Author seems to have been involved in the Project described in the paper, so the study findings must relate to the Project activities, but there is no clear methodology outlined in the paper
199	Sidhu, B.S., Rupela, O.P., Beri, V. and Joshi, P.K., 1998. Sustainability implications of burning rice-and wheat-straw in Punjab. Economic and Political Weekly, pp.A163-A168.	1	1998	Q	English
200.i	Fujisaka, S. and White, D., 1998. Pasture or permanent crops after slash-and-burn cultivation? Land-use choice in three Amazon colonies. Agroforestry Systems, 42(1), pp.45-59.	2	1998	Q	English
200.ii	Fujisaka, S., Bell, W., Thomas, N., Hurtado, L. and Crawford, E., 1996. Slash-and-burn agriculture, conversion to pasture, and deforestation in two Brazilian Amazon colonies. Agriculture, Ecosystems & Environment, 59(1-2), pp.115-130.	2	1996	Q; R	English
201	Pandey, S. and Van Minh, D., 1998. A socio-economic analysis of rice production systems in the uplands of northern Vietnam. Agriculture, ecosystems & environment, 70(2-3), pp.249-258.	1	1998	Q	English
202	Nautiyal, S., Maikhuri, R.K., Semwal, R.L., Rao, K.S. and Saxena, K.G., 1998. Agroforestry systems in the rural landscape–a case study in Garhwal Himalaya, India. Agroforestry Systems, 41(2), pp.151-165.	1	1998	I	English
203	Silva-Forsberg, M.C. and Fearnside, P.M., 1997. Brazilian Amazonian caboclo agriculture: effect of fallow period on maize yield. Forest Ecology and Management, 97(3), pp.283-291.	1	1997	Q; S	English
204	Kamada, M. and Nakagoshi, N., 1997. Influence of cultural factors on landscapes of mountainous farm villages in western Japan. Landscape and Urban Planning, 37(1-2), pp.85-90.	1	1997	I; R	English
205	Lambert, D.P., 1996. Crop diversity and fallow management in a tropical deciduous forest shifting cultivation system. Human Ecology, 24(4), pp.427-453.	1	1996	Q; I; S	English
206	Ataupah, H., 1999. Fire, traditional Knowledge and Cultural Perspectives in Nusa Tenggara Timur. Fire and sustainable agricultural and forestry development in Eastern Indonesia and Northern Australia, ACIAR proceedings No. 91, pp. 73-76.	1	1999	O	English	Written by member of Meto ethnolinguistic group (also an academic) based on their Indigenous knowledge
207	Therik, T., 1999. The role of fire in swidden cultivation: a Timor case study. Fire and sustainable agricultural and forestry development in Eastern Indonesia and Northern Australia, ACIAR proceedings No. 91, pp. 77-79.	1	1999	E	English
208	Stronach, N., 1999. Fire in the Trans-Fly savanna, Irian Jaya/PNG. Fire and sustainable agricultural and forestry development in Eastern Indonesia and Northern Australia, ACIAR proceedings No. 91, pp. 90-94.	1	1999	O	English	Written from the author's experience of working with the Livestock Division in the Government and with a WWF funded project
209	Courte, A., Cialdella, N., Muller, A., Blanfort, V., Bochu, J.L. and Brossard, M., 2020. Recenser et évaluer les pratiques agricoles qui stockent le carbone des sols, premier pas vers une agriculture à faible impact en Guyane. Cahiers Agricultures, 29, p.21.	1	2020	I; S	French
210.i	Dressler, W.H., Smith, W., Kull, C.A., Carmenta, R. and Pulhin, J.M., 2020. Recalibrating burdens of blame: Anti-swidden politics and green governance in the Philippine Uplands. Geoforum.	2	2020	E; I	English
210.ii	Dressler, W. and Pulhin, J., 2010. The shifting ground of swidden agriculture on Palawan Island, the Philippines. Agriculture and Human Values, 27(4), pp.445-459.	2	2010	I	English
211.i	Setty, R.S., Bawa, K., Ticktin, T. and Gowda, C.M., 2008. Evaluation of a participatory resource monitoring system for nontimber forest products: the case of amla (Phyllanthus spp.) fruit harvest by Soligas in South India. Ecology and Society, 13(2).	2	2008	P	English
211.ii	Rai, N.D., Gowda, C.M. and Setty, S., 2007. Taragu Benki: fire use by Soliga adivasis in Biligiri Rangaswamy Temple Wildlife Sanctuary, Karnataka. In Rethinking forest fires: proceedings of the national workshop on forest fires. Ashoka Trust for Research in Ecology and the Environment, New Delhi, India.	2	2007	I; F; P; S	English
212	Maxwell, A.L., 2004. Fire regimes in north‐eastern Cambodian monsoonal forests, with a 9300‐year sediment charcoal record. Journal of Biogeography, 31(2), pp.225-239.	1	2004	I; S	English
213	Otterstrom, S.M., 2004. Fire in a neotropical dry forest: cultural uses and ecological effects. PhD thesis, University of California, Davis.	1	2004	E; I; Q	English
214	Huffman, M.R., 2010. Community-based fire management at La Sepultura Biosphere Reserve, Chiapas, Mexico. PhD thesis, Colorado State University.	1	2010	I; F; S; P; E	English
215	Cortez, C.J., 2016. Intensive smallholding farming in the Belizean Maya Milpa and Matahambre agro-ecosystems. Master's thesis, University of California, Davis.	1	2016	E; I; S	English
216	Binford, E.M., 2007. Dynamics of land use among Maya of Southern Belize. PhD thesis, University of Florida	1	2007	I	English
217	Steinberg, M.K., 1998. Political ecology and cultural change: Impacts on swidden-fallow agroforestry practices among the Mopan Maya in southern Belize. The Professional Geographer, 50(4), pp.407-417.	1	1998	I; S	English
218	Cabrera-García, L., 2008. Linking social and ecological dynamics for bird conservation: protecting the endangered Sierra Madre Sparrow in Chichinautzin, Mexico. PhD thesis,	1	2008	E; I; P; F; A; R; S	English
219	Hamilton, A., 2000. The characteristics and effects of management fire on blanket-bog vegetation in north-west Scotland. PhD thesis, University of Edinburgh	1	2000	S	English
220	Roberts, S.J., 1997. Gunak, Gapalg Dja Gungod ('Fire, floodplain and paperbark'): a study of fire behaviour in the Melaleuca-floodplain communities of Kakadu National Park, Northern Territory, Australia. PhD thesis, School of Oriental and African Studies, University of London.	1	1997	S; I; E; R	English
221.i	Humphrey, G., 2018. The role of humans, climate and vegetation in the complex fire regimes of north-east Namibia. PhD thesis, University of Cape Town.	2	2018	I; R; A; F; P	English
221.ii	Humphrey, G.J., Gillson, L. and Ziervogel, G., 2020. How changing fire management policies affect fire seasonality and livelihoods. Ambio 39(1), pp.1-17.	2	2020	I; R; A; F; P	English
222	Terefe, B. and Kim, D.G., 2019. Shifting cultivation maintains but its conversion to mono-cropping decreases soil carbon and nitrogen stocks compared to natural forest in Western Ethiopia. Plant and Soil, pp.1-13.	1	2019	S	English
223	Schmidt, I.B., 2011. Effects of local ecological knowledge, harvest and fire on golden-grass (Syngonanthus nitens, Eriocaulaceae), a non-timber forest product (NTFP) species from the Brazilian savanna. PhD thesis, University of Hawaii at Manoa.	1	2011	S; I	English
224	Warren, A., Kosonen, J., Katundu, M., Matinga, B. 2001. Causes and Consequences of Anthropogenic Fire in Mulanje Mountain Forest Reserve, Southern Malawi. Master's thesis, University of Kent at Canterbury.	1	2001	I; F	English
225	López‐Mársico, L., Lezama, F. and Altesor, A., 2020. Heterogeneity decreases as time since fire increases in a South American grassland. Applied Vegetation Science.	1	2020	S; I	English
226	Mulder, V., Heri, V. and Wickham, T., 2000. Traditional honey and wax collection with Apis dorsata in the upper Kapuas Lake Region, West Kalimantan. Borneo Research Bulletin, pp.246-261.	1	2000	U	English	Methods are not described, but assume ethnographic
227	Bernard, T. and Moetapele, N., 2005. Desiccation of the Gomoti River: biophysical process and indigenous resource management in Northern Botswana. Journal of Arid Environments, 63(1), pp.256-283.	1	2005	I	English
228	Cassidy, L., 2003. Anthropogenic burning in the Okavango panhandle of Botswana: livelihoods and spatial dimensions. PhD thesis, University of Florida.	1	2003	R; Q; I	English
229	Coggins, C.R., 2002. Ferns and fire: village subsistence, landscape change, and nature conservation in China's southeast uplands. Journal of Cultural Geography, 19(2), pp.129-159.	1	2002	I	English
230	Copsey, J.A., Jones, J.P., Andrianandrasana, H., Rajaonarison, L.H. and Fa, J.E., 2009. Burning to fish: local explanations for wetland burning in Lac Alaotra, Madagascar. Oryx, 43(3), pp.403-406.	1	2009	I; Q	English
231	Dampha, A., Kamara, K. and Beck, C., 2003. Management of forest fires through the involvement of local communities: the Gambia. In Communities in flames: Proceedings of an international conference on community involvement in fire management (pp.45-62). UN-FAO.	1	2003	I; F	English
232	Darlong, V.T., 2002. Traditional community-based fire management among the Mizo shifting cultivators of Mizoram in northeast India. In Communities in flames: Proceedings of an international conference on community involvement in fire management (pp. 119-124). UN-FAO.	1	2002	U	English
233	Fule, P.Z., Ramos-Gómez, M., Cortés-Montaño, C. and Miller, A.M., 2011. Fire regime in a Mexican forest under indigenous resource management. Ecological Applications, 21(3), pp.764-775.	1	2011	S; I	English
234	Hartel, T., Dorresteijn, I., Klein, C., Máthé, O., Moga, C.I., Öllerer, K., Roellig, M., von Wehrden, H. and Fischer, J., 2013. Wood-pastures in a traditional rural region of Eastern Europe: Characteristics, management and status. Biological Conservation, 166, pp.267-275.	1	2013	S	English	Descriptions of burning cited as personal observation
235.i	Hecht, S.B., 2009. Kayapó savanna management: fire, soils, and forest islands in a threatened biome. In Amazonian dark earths: Wim Sombroek's vision (pp. 143-162). Springer, Dordrecht.	2	2009	S; E; I	English
235.ii	Hecht, S.B., 2003. Indigenous management and the creation of Amazonian Dark Earths: implications of Kayapo Practices. In Lehman, J., D.C. Kern. B. Glaser and W.I. Woods (Eds.) Amazonian dark earths: Origin properties and management, pp. 355-373. Springer Netherlands.	2	2003	S; E	English
236	Johnson, L.M., 1999. Aboriginal burning for vegetation management in northwest British Columbia. In R. Boyd (Ed.) Indians, Fire and the Land in the Pacific Northwest, pp.238-54.	1	1999	I	English
237.i	King, T.G., 2004. A burning question? Fire, livelihoods and sustainability in the Navosa region of the Fiji Islands. PhD thesis, Massey University.	2	2004	I; E; P; A; R; Q	English
237.ii	King, T. 2018. Burning lands: fire and livelihoods in the Navosa Hill Region, Fiji Islands. In C. T. Fowler and J. R. Welch (Eds.) Fire otherwise: ethnobiology of burning for a changing world, pp. 183-212. The University of Utah Press.	2	2018	I; E; P; A; R; Q	English
238	Lichang, Z., Long, W., Yaqiao, Z. and Caizhen, L., 2001. Community-based forest fire management in Wenyime village, Sanchahe township, Dayao county, Chuxiong Yi autonomous prefecture, Yunnan province, China. In Communities in flames: Proceedings of an international conference on community involvement in fire management (pp.31-45). UN-FAO.	1	2001	F; I; Q	English
239	London, S., 2001. Community-based fire management in Lao People’s Democratic Republic: past, present and future. In Communities in flames: Proceedings of an international conference on community involvement in fire management (pp.98-121). UN-FAO.	1	2001	U	English
240	Nanda, P.K. and Sutar, P.C., 2001. Management of forest fire through local communities: a study in the Bolangir, Deogarh and Sundergarh districts of Orissa, India. In Communities in flames: Proceedings of an international conference on community involvement in fire management (pp.79-97). UN-FAO.	1	2001	F; I	English
241	Mbata, K.J., Chidumayo, E.N. and Lwatula, C.M., 2002. Traditional regulation of edible caterpillar exploitation in the Kopa area of Mpika district in northern Zambia. Journal of Insect Conservation, 6(2), pp.115-130.	1	2002	Q; S	English
242	Métailié, J.P., 2006. Mountain landscape, pastoral management and traditional practices in the Northern Pyrenées (France). In M. Agnoletti (Ed.) The conservation of Cultural Landscapes (pp. 108-124). CAB International.	1	2006	A, E	English
243.i	Natcher, D.C., Calef, M., Huntington, O., Trainor, S., Huntington, H.P., DeWilde, L.O., Rupp, S. and Chapin III, F.S., 2007. Factors contributing to the cultural and spatial variability of landscape burning by native peoples of interior Alaska. Ecology and Society, 12(1).	2	2007	A; I; P	English
243.ii	Natcher, D.C., 2004. Implications of fire policy on Native land use in the Yukon Flats, Alaska. Human Ecology, 32(4), pp.421-441.	2	2004	A, I, E	English
244	Rodríguez, I., Albert, P., La Rose, C. and Sharpe, C., 2011. A study of the use of fire by Amerindian communities in South Rupununi, Guyana, with recommendations for sustainable land management. Forest Peoples Project, Moreton-in-Marsh, UK.	1	2011	I; F; P; E	English
245	Seijo, F., 2005. The politics of fire: Spanish forest policy and ritual resistance in Galicia, Spain. Environmental Politics, 14(3), pp.380-402.	1	2005	E	English
246	Shaoliang, Y., Ning, W., Peng, L., Qian, W., Fusun, S., Geng, S. and Jianzhong, M., 2007. Changes in livestock migration patterns in a Tibetan-style agropastoral system. Mountain Research and Development, 27(2), pp.138-145.	1	2007	I; Q; E; P; A	English
247	Sheuyange, A., Oba, G. and Weladji, R.B., 2005. Effects of anthropogenic fire history on savanna vegetation in northeastern Namibia. Journal of Environmental management, 75(3), pp.189-198.	1	2005	S	English
248	Tefera Benyene, S., Snyman, H.A. and Smit, G.N., 2007. Cattle-rangeland management practices and perceptions of pastoralists towards rangeland degradation in the Borana zone of southern Ethiopia. Journal of environmental management, 82(4), pp.481-494.	1	2007	I; F; Q	English
249.i	Vaarzon-Morel, P. and Gabrys, K., 2009. Fire on the horizon: contemporary Aboriginal burning issues in the Tanami Desert, central Australia. GeoJournal, 74(5), p.465.	2	2009	P; E; I	English
249.ii	Gabrys, K. and Vaarzon-Morel, P., 2009. Aboriginal burning issues in the southern Tanami: towards understanding tradition-based fire knowledge in a contemporary context. In G.P. Edwards and G.E. Allan (Eds.). Desert Fire: Fire and Regional Land Management in the Arid Landscapes of Australia’(pp. 79-186). Desert Knowledge Cooperative Research Centre, Report 37	2	2009	P; E; O	English
250	Ohsawa, S., Nimonjiya, S. and Shimoda, A., 2014. Field notes on the dietary habits of the Mlabri hunter-gatherers in Thailand. International Journal of Human Culture Studies, 2014(24), pp.234-244.	1	2014	I	English
251	Mertz, O. and Christensen, H., 1997. Land use and crop diversity in two Iban communities, Sarawak, Malaysia. Geografisk Tidsskrift-Danish Journal of Geography, 97(1), pp.98-110.	1	1997	I; S	English
252	Lim, J.N.W. and Douglas, I., 1998. The impact of cash cropping on shifting cultivation in Sabah, Malaysia. Asia Pacific Viewpoint, 39(3), pp.315-326.	1	1998	I	English
253	Gurri, F. and Moran, E., 2002. Who is interested in commercial agriculture? Subsistence agriculture and salaried work in the city among Yucatec Maya from the State of Yucatan. Culture & Agriculture, 24(1), pp.42-48.	1	2002	Q	English
254	Mangora, M.M., 2005. Ecological impact of tobacco farming in miombo woodlands of Urambo District, Tanzania. African Journal of Ecology, 43(4), pp.385-391.	1	2005	Q; S	English
255	Araki, S., 2007. Ten years of population change and the chitemene slash-and-burn system around the Mpika Area, Northern Zambia. African Study Monographs. Supp. Issue (2007):34, pp. 75-89	1	2007	R	English
256	Oyama, S., 1996. Regeneration process of the miombo woodland at abandoned citemene fields of northern Zambia. African Study Monographs (1996), 17(3), pp. 101-116	1	1996	S	English
257	Pulido, M.T. and Caballero, J., 2006. The impact of shifting agriculture on the availability of non-timber forest products: the example of Sabal yapa in the Maya lowlands of Mexico. Forest Ecology and Management, 222(1-3), pp.399-409.	1	2006	S; I	English
258	Freire, G.N., 2007. Indigenous shifting cultivation and the new Amazonia: a Piaroa example of economic articulation. Human Ecology, 35(6), pp.681-696.	1	2007	E; R	English
259	Porro, R., 2005. Palms, pastures, and swidden fields: the grounded political ecology of “agro-extractive/shifting-cultivator peasants” in Maranhão, Brazil. Human ecology, 33(1), pp.17-56.	1	2005	E; I; Q; R	English
260	Rasul, G., Thapa, G.B. and Zoebisch, M.A., 2004. Determinants of land-use changes in the Chittagong Hill Tracts of Bangladesh. Applied geography, 24(3), pp.217-240.	1	2004	Q; I	English
261	Abate, T. and Angassa, A., 2016. Conversion of savanna rangelands to bush dominated landscape in Borana, Southern Ethiopia. Ecological processes, 5(1), p.6.	1	2016	R; F; A	English
262	Fox, J., McMahon, D., Poffenberger, M. and Vogler, J., 2008. Land for my grandchildren: land use and tenure change in Ratanakiri: 1989-2007. Community Forestry International.	1	2008	R; I; F	English
263	Thongmanivong, S. and Fujita, Y., 2006. Recent land use and livelihood transitions in northern Laos. Mountain Research and Development, 26(3), pp.237-244.	1	2006	R; I; F; A	English
264	Sati, V.P., 2019. Shifting cultivation in Mizoram, India: An empirical study of its economic implications. Journal of Mountain Science, 16(9), pp.2136-2149.	1	2019	Q	English
265	Tiwari, B.K., 2010. Innovations in shifting cultivation, land use and land cover change in higher elevations of Meghalaya, India. In Ramakrishnan, Saxena, Patnaik, Singh (Eds.) Methodological issues in mountain research. A socio-ecological system approach observations.	1	2010	Q; F	English
266	Prokop, P., Kruczkowska, B., Syiemlieh, H.J. and Bucała‐Hrabia, A., 2018. Impact of topography and sedentary swidden cultivation on soils in the hilly uplands of North‐East India. Land Degradation & Development, 29(8), pp.2760-2770.	1	2018	S; R	English
267	Thaler, G.M. and Anandi, C.A.M., 2017. Shifting cultivation, contentious land change and forest governance: the politics of swidden in East Kalimantan. The Journal of Peasant Studies, 44(5), pp.1066-1087.	1	2017	E; I	English
268	Ando, K., Shinjo, H., Noro, Y., Takenaka, S., Miura, R., Sokotela, S.B. and Funakawa, S., 2014. Short-term effects of fire intensity on soil organic matter and nutrient release after slash-and-burn in Eastern Province, Zambia. Soil Science and Plant Nutrition, 60(2), pp.173-182.	1	2014	S	English
269	Edirisinghe, P.N. and Hearath, H.M.B.S., 2017. Are All Shifting Cultivators poor? Evidence from Sri Lanka's Dry zones. South Asian Network for Development and Environmental Economics (SANDEE) Working paper No. 117-17	1	2017	Q; R	English
270	Hoover, J.D., Leisz, S.J. and Laituri, M.E., 2017. Comparing and combining landsat satellite imagery and participatory data to assess land-use and land-cover changes in a coastal village in Papua New Guinea. Human Ecology, 45(2), pp.251-264.	1	2017	R; P; Q; I	English
271	Dawoe, E.K., Quashie-Sam, J., Isaac, M.E. and Oppong, S.K., 2012. Exploring farmers’ local knowledge and perceptions of soil fertility and management in the Ashanti Region of Ghana. Geoderma, 179, pp.96-103.	1	2012	Q; F; S	English
272	Bhagawati, K., Bhagawati, G., Das, R., Bhagawati, R. and Ngachan, S.V., 2015. The structure of Jhum (Traditional Shifting Cultivation System): prospect or threat to climate. International Letters of Natural Sciences, 46.	1	2015	I; E	English
273	Blanco, J., Pascal, L., Ramon, L., Vandenbroucke, H. and Carrière, S.M., 2013. Agrobiodiversity performance in contrasting island environments: The case of shifting cultivation in Vanuatu, Pacific. Agriculture, ecosystems & environment, 174, pp.28-39.	1	2013	S; I	English
274	Siahaya, M.E., Hutauruk, T.R., Aponno, H.S., Hatulesila, J.W. and Mardhanie, A.B., 2016. Traditional ecological knowledge on shifting cultivation and forest management in East Borneo, Indonesia. International Journal of Biodiversity Science, Ecosystem Services & Management, 12(1-2), pp.14-23.	1	2016	E; I	English
275.i	Altman, J., Ansell, J. and Yibarbuk, D., 2020. No ordinary company: Arnhem Land Fire Abatement (Northern Territory) Limited. Postcolonial Studies, pp.1-23.	1	2020	E	English	Authors are directly involved with ALFA, so I have counted the research methodology as ethnography
275.ii	Yibarbuk, D and Ansell, J. 2020. Fire management in Arnhem Land. In A. Leavesley, M. Wouters, and R. Thornton (Eds.) Prescribed burning in Australasia: the science, practice and politics of burning the bush, pp. 49-53. Australasian Fire and Emergency Service Authorities Council Limited.	1	2020	E	English	Authors are directly involved with ALFA, so I have counted the research methodology as ethnography
276	Schwartzman, S., Boas, A.V., Ono, K.Y., Fonseca, M.G., Doblas, J., Zimmerman, B., Junqueira, P., Jerozolimski, A., Salazar, M., Junqueira, R.P. and Torres, M., 2013. The natural and social history of the indigenous lands and protected areas corridor of the Xingu River basin. Philosophical Transactions of the Royal Society B: Biological Sciences, 368(1619), p.20120164.	1	2013	U	English
277	Bilbao, B., Mistry, J., Millán, A. and Berardi, A., 2019. Sharing multiple perspectives on burning: towards a participatory and intercultural fire management policy in Venezuela, Brazil, and Guyana. Fire, 2(3), p.39.	1	2019	P	English
278	Rocha, E.C. and Silva, E., 2009. Composição da mastofauna de médio e grande porte na reserva indígena "Parabubure", Mato Grosso, Brasil. Revista Árvore, 33(3), pp.451-459.	1	2009	S	Portuguese
279	Carneiro, J.P.J.A., 2010. Baaraznau Wapichan: etnolinguística fitogeográfica Wapixana. Acta Geográfica, 3(6), pp.17-25.	1	2010	U	Portuguese
280	de Moraes Falleiro, R., 2011. Resgate do manejo tradicional do cerrado com fogo para proteção das terras indígenas do oeste do Mato Grosso: um estudo de caso. Biodiversidade brasileira, (2), pp.86-96.	1	2011	P	Portuguese
281	de Moraes Falleiro, R., Santana, M.T. and Berni, C.R., 2016. As contribuições do Manejo Integrado do Fogo para o controle dos incêndios florestais nas Terras Indígenas do Brasil. Biodiversidade Brasileira-BioBrasil, (2), pp.88-105.	1	2016	U	Portuguese
282	Lazzarini, G.M.J., de Oliveira, L.N., Giongo, M., Lima, W.G. and da Silva Feitosa, T.D.C., 2016. Avaliação da eficácia da implementação de brigadas indígenas como política de combate a incêndios florestais. Biodiversidade Brasileira-BioBrasil, (2), pp.106-120.	1	2016	R; A	Portuguese
283.i	Borges, S.L., Eloy, L., Schmidt, I.B., Barradas, A.C.S. and Santos, I.A.D., 2016. Fire management in veredas (palm swamps): new perspectives on traditional farming systems in Jalapão, Brazil. Ambiente & Sociedade, 19(3), pp.269-294.	6	2016	I; P; R; A	English	Also available in Portuguese
283.ii	Eloy, L., Borges, S., Schmidt, I. and Barradas, A.C., 2018. Fire management in Brazilian savanna wetlands: new insights from traditional swidden cultivation systems in the Jalapão region (Tocantins). In C. T. Fowler and J. R. Welch (Eds.) Fire otherwise: ethnobiology of burning for a changing world, pp.82-103. The University of Utah Press.	6	2018	I; P; R; A	English
283.iii	Schmidt, I.B., Moura, L.C., Ferreira, M.C., Eloy, L., Sampaio, A.B., Dias, P.A. and Berlinck, C.N., 2018. Fire management in the Brazilian savanna: First steps and the way forward. Journal of applied ecology, 55(5), pp.2094-2101.	6	2018	P; E; R	English	Authors have been involved with the Integrated Fire Management Programme, so I have included ethnography as a methodology
283.iv	Eloy, L., Schmidt, I.B., Borges, S.L., Ferreira, M.C. and dos Santos, T.A., 2019. Seasonal fire management by traditional cattle ranchers prevents the spread of wildfire in the Brazilian Cerrado. Ambio, 48(8), pp.890-899.	6	2019	I; P; R	English
283.v	Eloy, L., Aubertin, C., Toni, F., Lúcio, S.L.B. and Bosgiraud, M., 2016. On the margins of soy farms: traditional populations and selective environmental policies in the Brazilian Cerrado. The Journal of Peasant Studies, 43(2), pp.494-516.	6	2016	E; I; P; R; A	English
283.vi	Eloy, L., A. Bilbao, B., Mistry, J. and Schmidt, I.B., 2019. From fire suppression to fire management: advances and resistances to changes in fire policy in the savannas of Brazil and Venezuela. The Geographical Journal, 185(1), pp.10-22.	6	2019	E; A	English
284.i	Schmidt, I.B., Moura, L.C., Ferreira, M.C., Eloy, L., Sampaio, A.B., Dias, P.A. and Berlinck, C.N., 2018. Fire management in the Brazilian savanna: First steps and the way forward. Journal of applied ecology, 55(5), pp.2094-2101.	3	2018	P; E; R	English	Authors have been involved with the Integrated Fire Management Programme, so I have included ethnography as a methodology
284.ii	Eloy, L., Schmidt, I.B., Borges, S.L., Ferreira, M.C. and dos Santos, T.A., 2019. Seasonal fire management by traditional cattle ranchers prevents the spread of wildfire in the Brazilian Cerrado. Ambio, 48(8), pp.890-899.	3	2019	I; P; R	English
284.iii	Eloy, L., A. Bilbao, B., Mistry, J. and Schmidt, I.B., 2019. From fire suppression to fire management: advances and resistances to changes in fire policy in the savannas of Brazil and Venezuela. The Geographical Journal, 185(1), pp.10-22.	3	2019	E; A	English
285	Dhakal, S., 2000. An anthropological perspective on shifting cultivation: A case study of Khoriya cultivation in the Arun Valley of Eastern Nepal. Occasional Papers in Sociology and Anthropology, 6, pp.93-111.	1	2000	E	English
286	Sharma, D.P., 2011. Understanding the Chepangs and shifting cultivation: A case study from rural village of central Nepal. Dhaulagiri Journal of Sociology and Anthropology, 5, pp.247-262.	1	2011	I; E; F	English
287	Lefevre, B. and Pinard, M., 2011. Traditional Beekeeping and Patterns of Host Tree Use in the Harenna Forest, Bale Mountains National Park. Walia Special Edition on the Bale Mountains, pp.208-212.	1	2011	E; S	English
288	Belayneh, A., Yohannes, T. and Worku, A., 2013. Recurrent and extensive forest fire incidence in the Bale Mountains National Park (BMNP), Ethiopia: extent, cause and consequences. International Journal of Environmental Sciences, 2(1), pp.29-39.	1	2013	I; F; R	English
289	Khatun, K., Corbera, E. and Ball, S., 2017. Fire is REDD+: offsetting carbon through early burning activities in south-eastern Tanzania. Oryx, 51(1), pp.43-52.	1	2017	A; I; Q; F	English
290	Oellerer, K., 2014. The ground vegetation management of wood-pastures in Romania–insights in the past for conservation management in the future. Applied Ecology and Environmental Research, 12(2), pp.549-562.	1	2014	A; I	English
291	Ziobro, J., Koziarz, M., Havrylyuk, S., Korol, M., Ortyl, B., Wolański, P. and Bobiec, A., 2016. Spring grass burning: an alleged driver of successful oak regeneration in sub-carpathian marginal woods. a case study. Prace Geograficzne, (146), pp.67-88.	1	2016	S; I	English
292	Appiah, M., Damnyag, L., Blay, D. and Pappinen, A., 2010. Forest and agroecosystem fire management in Ghana. Mitigation and adaptation strategies for global change, 15(6), pp.551-570.	1	2010	I; F	English
293	Carvalheiro, K., 2004. Community fire management in the Maraba region, Brazilian Amazonia. Masters thesis, University of Florida.	1	2004	E; I; P	English
294	Beatty, R., 2011. Annexes–CBFiM Case Studies: Annex 1: CBFiM in Namibia: the Caprivi Integrated Fire Management Programme. Community-based fire management: a review; FAO: Rome, Italy, pp.41-47.	1	2011	U	English	Written by FAO staff, presumably from direct experience of the Integrated Fire Management Programme
295	Rahman, S.A., Rahman, M.F. and Sunderland, T., 2012. Causes and consequences of shifting cultivation and its alternative in the hill tracts of eastern Bangladesh. Agroforestry systems, 84(2), pp.141-155.	1	2012	Q; I	English
296	Kikula, I.S., 1997. Policy implications on environment: the case of villagisation in Tanzania. Nordic Africa Institute.	1	1997	Q; I; S; A; R	English
297	Mshale, B, Mshana, Magani and Pendo Yared. 2012. Improving agricultural practices in the context of REDD readiness in Lindi Rural District, Tanzania: a review of current agricultural practices and recommendations for project interventions. Tanzania Forest Conservation Group.	1	2012	I; F; E	English
298	Ibarra, J.T., Barreau, A., Campo, C.D., Camacho, C.I., Martin, G.J. and McCandless, S.R., 2011. When formal and market-based conservation mechanisms disrupt food sovereignty: impacts of community conservation and payments for environmental services on an indigenous community of Oaxaca, Mexico. International Forestry Review, 13(3), pp.318-337.	1	2011	I; P; Q; E	English
299	Fernández-Giménez, M.E. and Estaque, F.F., 2012. Pyrenean pastoralists’ ecological knowledge: documentation and application to natural resource management and adaptation. Human Ecology, 40(2), pp.287-300.	1	2012	I; P; E	English
300	Stone, G. and Langer, E.R., 2015. Te ahi i te ao Māori/Māori use of fire: traditional use of fire to inform current and future fire management in New Zealand. MAI Journal: New Zealand Journal of Indigenous Scholarship, 4, pp.15-28.	1	2015	I; A	English
301	Gerritsen, P.R., 2002. Diversity at Stake: a farmers' perspective on biodiversity and conservation in western Mexico. PhD thesis, Wageningen University	1	2002	E; I; Q	English
302	Borrego, A. and Skutsch, M., 2014. Estimating the opportunity costs of activities that cause degradation in tropical dry forest: Implications for REDD+. Ecological Economics, 101, pp.1-9.	1	2014	Q	English
303	Ruiz-Mirazo, J., Martínez-Fernández, J. and Vega-García, C., 2012. Pastoral wildfires in the Mediterranean: understanding their linkages to land cover patterns in managed landscapes. Journal of environmental management, 98, pp.43-50.	1	2012	A	English
304	Sayles, J., 2008. Tapaiitam: Human modifications of the coast as adaptations to environmental change, Wemindji, Eastern James Bay. Master's thesis, Concordia University.	1	2008	E; I ; R	English
305.i	Dumas, P., Toussaint, M., Herrenschmidt, J.B., Conte, A. and Mangeas, M., 2013. Le risque de feux de brousse sur la Grande Terre de Nouvelle-Calédonie: l’Homme responsable, mais pas coupable. Revue Géographique de l'Est, 53(1-2).	3	2013	R; A; E; I	French
305.ii	Toussaint, M., 2018. L'épreuve du feu: politiques de la nature, savoirs, feux de brousse et décolonisation en Nouvelle-Calédonie. PhD thesis, Paris Sciences et Lettres.	3	2018	I; Q; E; A	French
305.iii	Toussaint, M., 2019. Are bush fires and drought ‘natural disasters’? The naturalisation of politics and politicisation of nature in New Caledonia. Anthropological Forum, 30(1-2), pp.157-173.	3	2019	I; Q; E; A	English
306	Smith, C.E., 2019. Fire trace: plans and practices of conservation and development in Belize's coastal savanna, 1920 to present. PhD thesis, University of Edinburgh.	1	2019	I; Q; E; A	English
307	Norgaard, K.M., 2014. The politics of fire and the social impacts of fire exclusion on the Klamath. Humboldt Journal of Social Relations, 36(1).	1	2014	I; Q; A	English
308	Meddour-Sahar, O., Lovreglio, R., Meddour, R., Leone, V. and Derridj, A., 2013. Fire and people in three rural communities in Kabylia (Algeria): results of a survey. Open Journal of Forestry, 3(01), p.30.	1	2013	Q	English
309	Elias, M., Hensel, O., Richter, U., Hülsebusch, C., Kaufmann, B. and Wasonga, O., 2015. Land conversion dynamics in the Borana rangelands of Southern Ethiopia: an integrated assessment using remote sensing techniques and field survey data. Environments, 2(1), pp.1-31.	1	2015	Q; F; R; P	English
310	Abule, E., Snyman, H.A. and Smit, G.N., 2005. Comparisons of pastoralists perceptions about rangeland resource utilisation in the Middle Awash Valley of Ethiopia. Journal of Environmental management, 75(1), pp.21-35.	1	2005	I; Q	English
311	Velempini, K. and Perkins, J.S., 2008. Integrating indigenous technical knowledge and modern scientific knowledge for biodiversity conservation and human livelihoods in the southern Kalahari, Botswana. Botswana Notes and Records, pp.75-88.	1	2008	Q; I; F	English
312	Seijo, F., Godoy, M.M., Guglielmin, D., Ciampoli, C., Ebright, S., Picco, O. and Defossé, G., 2020. Conflicting frames about ownership and land use drive wildfire ignitions in a protected conservation area. Environmental Management, pp.1-15.	1	2020	Q; R; S	English
313.i	Vehrs, H.P., 2016. Changes in landscape vegetation, forage plant composition and herding structure in the pastoralist livelihoods of East Pokot, Kenya. Journal of Eastern African Studies, 10(1), pp.88-110.	2	2016	E; I	English
313.ii	Vehrs, H.P. and Heller, G.R., 2017. Fauna, fire, and farming: landscape formation over the past 200 years in pastoral East Pokot, Kenya. Human Ecology, 45(5), pp.613-625.	2	2017	E; I; Q; P; A; S	English
314	Green, A. and Tchinlé, J., 2004. Evaluation of Mbororo transhumance routes in the Tchabal Mbabo-Dodeo region of Cameroon. BirdLife International.	1	2004	I	English
315	Keating, P.L., 2007. Fire ecology and conservation in the high tropical Andes: observations from northern Ecuador. Journal of Latin American Geography, pp.43-62.	1	2007	S; A	English
316	Costa, L., 2004. Sob o fogo cruzado das campanhas: ambientalismo, comunicação e agricultura familiar na prevenção ao fogo acidental na Amazônia. PhD thesis, Universidade Federal do Pará.	1	2004	I	Portuguese
317	Borghesio, L., 2008. Effects of fire on the vegetation of a lowland heathland in North-western Italy. Plant Ecology, 201: pp. 723-731	1	2008	S	English
318	Akbar, A., 2011. Studi kearifan lokal penggunaan api persiapan lahan: studi kasus di hutan Mawas, Kalimantan Tengah. Jurnal Penelitian Sosial dan Ekonomi Kehutanan, 8(3), pp.211-230.	1	2011	Q; I; E	Indonesian
319	Amissah, L., 2009. Indigenous fire management practices in Ghana. Traditional forest-related knowledge and sustainable forest management in Africa. IUFRO World Series 23, pp.131-135.	1	2009	I; F	English
320.i	Amissah, L., Kyereh, B. and Agyeman, V.K., 2010. Wildfire incidence and management in the forest transition zone of Ghana: farmers’ perspectives. Ghana Journal of Forestry, 26(1). pp. 61-73	2	2010	I; E; Q; A	English
320.ii	Amissah, L., Kyereh, B. and Agyeman, V.K., 2011. Wildfires as dominant force driving farming systems in the forest transition zone of Ghana. Ghana J. Forestry, 27(2), pp.52-65.	2	2011	I; E; Q; A	English
321	Toniolo, M.A., 2004. The role of land tenure in the occurrence of accidental fires in the Amazon region: case studies from the National Forest of Tapajós, Pará, Brazil. PhD thesis, Indiana University.	1	2004	A; Q; I; E; R; S	English
322	Cammelli, F., 2013. Smallholders collective action and fire risk in the Brazilian Amazon. Master's thesis, University of Florence.	1	2013	I; O	English	Q method
323	Souza, M. L. D., 2009. Institutional arrangements for fire management in the Brazilian Amazon. Master's thesis, University of Florida.	1	2009	A; Q; E	English
324	Fournier, A., 2011. Consequences of wooded shrine rituals on vegetation conservation in West Africa: a case study from the Bwaba cultural area (West Burkina Faso). Biodiversity and Conservation, 20(9), pp.1895-1910.	1	2011	I; E	English
325	Luning, S., 2005. Ritual territories and dynamics in the annual bush fire practices of Maane, Burkina Faso. In M. C Cormier-Salem, D. Juhe-Beaulaton, J. Boutrais and B. Roussel (Eds.) Patrimoines naturels au Sud: territoires, identités et strategies locales, pp.443-473. Éditions de l’IRD, colloques et séminaires.	1	2005	I; R; E	English
326	Fournier, A., Douanio, M. and Bene, A., 2014. Pratique et perception des feux de végétation dans un paysage de vergers. Le pays sèmè (Kénédougou, Burkina Faso). In G. Fabre, A. Fournier and L. Sanogo (Eds.) Regards scientifiques croisés sur le changement global et le développement - Langue, environnement, culture : Actes du Colloque international de Ouagadougou (8-10 mars 2012), pp.201-229.	1	2014	I; S	French
327	Cochran, J., 2003. Patterns of sustainable agriculture adoption/non-adoption in Panamá. Master's thesis, McGill University.	1	2003	I	English
328	Liberski-Bagnoud, D., Fournier, A. and Nignan, S., 2010. Les" bois sacrés", faits et illusions: à propos des sanctuaires boisés des Kasena (Burkina Faso). In D. Juhé-Beaulaton Forêts sacrées et sanctuaires boisés: des créations culturelles et biologiques (Burkina Faso, Togo, Bénin), pp. 59-90. Karthala Editions.	1	2010	E; S	French
329	Ideo, O., 2010. Farming systems and farmer strategies in the Suriname interior: the case of the Indigenous village of Matta. Master's Thesis, Wageningen University.	1	2010	E; I	English
330	Yaméogo, U.G., 2005. Le feu, un outil d'ingeniérie écologique au ranch de gibier de Nazinga au Burkina Faso. PhD thesis, Université D'Orleans.	1	2005	E; I ; S; F	French
331	Arguedas-Negrini, N., 2001. Distribution, habitat and behavior of grasshopper sparrows, Ammodramus savannarum (Passeriformes: Emberizidae) in northeastern Nicaragua. Revista de biología tropical, 49(2), pp.703-708.	1	2001	S	English
332	Ajayi, O.C. and Kwesiga, F., 2003. Implications of local policies and institutions on the adoption of improved fallows in eastern Zambia. Agroforestry systems, 59(3), pp.327-336.	1	2003	Q; P; I	English
333	Bhattacharya, P. and Hayat, S.F., 2004. Sustainable NTFP management for rural development: a case from Madhya Pradesh, India. International Forestry Review, 6(2), pp.161-168.	1	2004	O	English	Action research
334	Bonta, M., Pinot, O.F., Graham, D., Haynes, J. and Sandoval, G., 2006. Ethnobotany and conservation of tiusinte (Dioon mejiae Standl. & LO Williams, Zamiaceae) in northeastern Honduras. Journal of Ethnobiology, 26(2), pp.228-257.	1	2006	I; E	Spanish
335	Sadoulet, D., Castella, J.C., Nam, V.H. and Quang, D.D., 2002. A short history of land use changes and farming system differentiation in Xuat Hoa Commune, Bac Kan Province, Viet Nam. In J.C. Castella and D.D. Quang (Eds.) Doi Moi in the mountains: land use changes and farmers' livelihood strategies in Bac Kan Province, Viet Nam, pp. 21-46. The Agricultural Publishing House.	1	2002	I; R	English	Record supplemented with information from the introduction of the edited collection
336	Castella, J.C., Hoa, T.Q., Husson, O., Nam, V.H. and Quang, D.D., 2002. The declining role of ethnicity in farm household differentiation: A case study from Ngoc Phai Commune, Cho Don District, Bac Kan Province, Viet Nam. In J.C. Castella and D.D. Quang (Eds.) Doi Moi in the mountains: land use changes and farmers' livelihood strategies in Bac Kan Province, Viet Nam, pp. 21-46. The Agricultural P…	1	2002	I; R	English	Record supplemented with information from the introduction of the edited collection
337	Fatoux, C., Castella, J.C., Zeiss, M. and Manh, P.H., 2002. From rice cultivator to agroforester within a decade: The impact of Doi moi on agricultural diversification in a mountainous commune of Cho Moi District, Bac Kan Province, Viet Nam. In J.C. Castella and D.D. Quang (Eds.) Doi Moi in the mountains: land use changes and farmers' livelihood strategies in Bac Kan Province, Viet Nam, pp. 21-46…	1	2002	I; Q	English	Record supplemented with information from the introduction of the edited collection
338	Alther, C., Castella, J.C., Novosad, P., Rousseau, E. and Hieu, T.T. 2002. Impact of accessibility on the range of livelihood options available to farm households in mountainous areas of northern Viet Nam. In J.C. Castella and D.D. Quang (Eds.) Doi Moi in the mountains: land use changes and farmers' livelihood strategies in Bac Kan Province, Viet Nam, pp. 21-46. The Agricultural Publishing House.	1	2002	I; R; Q; E	English	Record supplemented with information from the introduction of the edited collection
339	Bonfim, V., Ribeiro, G., Silva, E. and Braga, G., 2003. Diagnóstico do uso do fogo no entorno do Parque Estadual da Serra do Brigadeiro (PESB). Rev. Árvore, 27(1), pp.87-94.	1	2003	Q; I	Portuguese
340	Carrière, S., 2003. Les orphelins de la forêt: pratiques paysannes et écologie forestière (Ntumu, Sud-Cameroun). IRD Editions.	1	2003	E	French
341	Cheewaphongphan, P. and Garivait, S., 2013. Bottom up approach to estimate air pollution of rice residue open burning in Thailand. Asia-Pacific Journal of Atmospheric Sciences, 49(2), pp.139-149.	1	2013	Q; S	English
342	Denny, S., 2015. Fire in the East Usambaras: an investigation into the factors driving agricultural burning practices bordering Amani Nature Reserve, Tanzania. Master's thesis, Imperial College London.	1	2015	I; F	English
343	Pereira, P., Pranskevicius, M., Cepanko, V., Vaitkute, D., Pundyte, N., Úbeda, X., Mataix-Solera, J., Cerdá, A. and Martin, D., 2013. Short-term vegetation recovery after a spring grassland fire in Lithuania. Effect of time and slope position. Flamma, 4, pp.13-17.	1	2013	S	English
344	De Assunção, R., Tetto, A.F. and Batista, A.C., 2017. O uso tradicional do fogo no assentamento Vale Verde, em Gurupi/TO. Revista Espacios, 38(17).	1	2017	I	Portuguese
345.i	Guevara-Hernández, F., Rodríguez-Larramendi, L.A., Delgado-Ruiz, F., Díaz-José, J., Pinto-Ruiz, R., Medina-Sanson, L., Ley-de Coss, A., Campos-Saldaña, R.A., Reyes-Muro, L., Salas-Marina, M.A. and Venegas-Venegas, J.A., 2017. Ruling Frameworks and Fire Use‐Conflicts in Tropical Forests of Chiapas, Mexico: A Discourse Analysis. In J. Szmyt (Ed.) Forest Fire. IntechOpen.	2	2017	P; I; E	English
345.ii	Guevara-Hernández, F., Gómez-Castro, H., Medina-Sansón, L., Rodríguez-Larramendi, L.A., Mendoza-Nazar, P., McCune, N.M., Tejeda-Cruz, C. and Pinto-Ruiz, R., 2013. Traditional fire use, governance and social dynamics in a Biosphere Reserve of Chiapas, Mexico. Pensee, 75(11), pp.110-125.	2	2013	P; I; E	English
346	Kauffman, J.B., Steele, M.D., Cummings, D.L. and Jaramillo, V.J., 2003. Biomass dynamics associated with deforestation, fire, and, conversion to cattle pasture in a Mexican tropical dry forest. Forest Ecology and Management, 176(1-3), pp.1-12.	1	2003	S	English
347	Kugbe, J.X., Mathias, F., Desta, T.L., Denich, M. and Vlek, P.L., 2012. Annual vegetation burns across the northern savanna region of Ghana: period of occurrence, area burns, nutrient losses and emissions. Nutrient cycling in agroecosystems, 93(3), pp.265-284.	1	2012	R; S	English
348	Long, C.L. and Zhou, Y., 2001. Indigenous community forest management of Jinuo people's swidden agroecosystems in southwest China. Biodiversity & Conservation, 10(5), pp.753-767.	1	2001	I; P	English
349	Lawrence, D., Peart, D.R. and Leighton, M., 1998. The impact of shifting cultivation on a rainforest landscape in West Kalimantan: spatial and temporal dynamics. Landscape Ecology, 13(3), pp.135-148.	1	1998	I; S	English
350	Moran, E.F., Adams, R., Bakoyéma, B., Fiorini, S. and Boucek, B., 2006. Human strategies for coping with El Niño related drought in Amazônia. Climatic Change, 77(3-4), pp.343-361.	1	2006	I	English
351	Augusseau, X., Nikiéma, P. and Torquebiau, E., 2006. Tree biodiversity, land dynamics and farmers’ strategies on the agricultural frontier of southwestern Burkina Faso. Biodiversity & Conservation, 15(2), pp.613-630.	1	2006	R; S; I	English
352	Yu, P.L., 1997. Hungry lightning: notes of a woman anthropologist in Venezuela. UNM Press.	1	1997	E	English
353	Butz, R.J., 2018. Fire in the African savanna: identifying challenges to traditional burning practices in Tanzania and Malawi. In C. T. Fowler and J. R. Welch (Eds.) Fire otherwise: ethnobiology of burning for a changing world, pp. 63-81. The University of Utah Press.	1	2018	U	English
354	LeCompte, J.K., 2018. Restoration, risk, and the (non) reintroduction of Coast Salish fire ecologies in Washington State. In C. T. Fowler and J. R. Welch (Eds.) Fire otherwise: ethnobiology of burning for a changing world, pp. 128-150. The University of Utah Press.	1	2018	E	English
355	Fowler, C. T. 2018. Assessing causes and effects of survival emissions from global to local scales: agropastoral communities in the North Kodi subdistrict of Sumba Island, Indonesia. In C. T. Fowler and J. R. Welch (Eds.) Fire otherwise: ethnobiology of burning for a changing world, pp. 213-231. The University of Utah Press.	1	2018	E	English
356	Kouassi, J.L., Wandan, N. and Mbow, C., 2020. Exploring wildfire occurrence: local farmers’ perceptions and adaptation strategies in central Côte d’Ivoire, West Africa. Journal of Sustainable Forestry, pp.1-20.	1	2020	Q; F; R	English
357	Metzger, J.P., 2002. Landscape dynamics and equilibrium in areas of slash-and-burn agriculture with short and long fallow period (Bragantina region, NE Brazilian Amazon). Landscape Ecology, 17(5), pp.419-431.	1	2002	R; S	English
358	Arvidsson, Å., 2009. Habitat selection of cattle in a traditionally fire-managed landscape in the Bale mountains, Ethiopia. Master's thesis, Sveriges Lantbruksuniversitet.	1	2009	I; S	English
359	Umaña, W.P. and Chaves, C.C., 2014. El bosque seco en llamas. Estructura agraria y ecología política del fuego en Costa Rica. Revista de Historia, (70), pp.109-142.	1	2014	A; I; F; P	Spanish
360	Pauli, N., Barrios, E., Conacher, A.J. and Oberthür, T., 2012. Farmer knowledge of the relationships among soil macrofauna, soil quality and tree species in a smallholder agroforestry system of western Honduras. Geoderma, 189, pp.186-198.	1	2012	I; P; E	English
361	Suyanto, S., Permana, R.P., Khususiyah, N. and Joshi, L., 2005. Land tenure, agroforestry adoption, and reduction of fire hazard in a forest zone: A case study from Lampung, Sumatra, Indonesia. Agroforestry Systems, 65(1), pp.1-11.	1	2005	Q	English
362	Saarnak, C.F., Nielsen, T.T. and Mbow, C., 2003. A local-scale study of the trace gas emissions from vegetation burning around the village of Dalun, Ghana, with respect to seasonal vegetation changes and burning practices. Climatic change, 56(3), pp.321-338.	1	2003	R; S	English
363	Rodrigues-Trejo, D.A. and Reyes, A.C., 2013. Advances in integrated fire management in Central Mexico. In González-Cabán, Armando, tech. coord. Proceedings of the fourth international symposium on fire economics, planning, and policy: climate change and wildfires. Gen. Tech. Rep. PSW-GTR-245 (English). Albany, CA: US Department of Agriculture, Forest Service, Pacific Southwest Research Station: 3…	1	2013	P	English
364	Virtanen, P., 2002. The role of customary institutions in the conservation of biodiversity: sacred forests in Mozambique. Environmental Values, pp.227-241.	1	2002	E; I; S	English
365	Dalle, G., Maass, B.L. and Isselstein, J., 2006. Encroachment of woody plants and its impact on pastoral livestock production in the Borana lowlands, southern Oromia, Ethiopia. African Journal of Ecology, 44(2), pp.237-246.	1	2006	I; S	English
366	Fusari, A. and Carpaneto, G.M., 2006. Subsistence hunting and conservation issues in the game reserve of Gile, Mozambique. Biodiversity & Conservation, 15(8), pp.2477-2495.	1	2006	Q	English
367	Ortiz Contla, H., 2009. Análisis del manejo tradicional de pastizales con fuego en el Ajusco. Master's thesis, Universidad Autonoma Chapingo.	1	2009	I	Spanish
368	Ponce Calderon, L., Vera Cortés, G., Álvarez Gordillo, G.D.C., Rodríguez Fernández, I., Rodríguez Trejo, D.A. and Villanueva Díaz, J., 2020. El nacimiento de los “Sin fuego”: caso Parque Nacional Lagunas de Montebello, Chiapas, México. Nova scientia 12(2), pp. 1-47.	1	2020	I	Spanish
369	Gutiérrez Navarro, A., García Barrios, L.E., Parra Vázquez, M. and Rosset, P., 2017. De la supresión al manejo del fuego en la Reserva de la Biosfera La Sepultura, Chiapas: perspectivas campesinas. Región y sociedad, 29(70), pp.31-70.	1	2017	I; Q; E	Spanish
370	Vigilante, T. and Bowman, D.M.J.S., 2004. Effects of individual fire events on the flower production of fruit-bearing tree species, with reference to Aboriginal people's management and use, at Kalumburu, North Kimberley, Australia. Australian Journal of Botany, 52(3), pp.405-416.	1	2004	E; S	English
371	Masoga, M.A., 2020. Fires, burning and flames narratives: reflections on some African Indigenous perspectives. In L. Mammino (Ed.) Biomass burning in Sub-Saharan Africa (pp. 121-141). Springer, Dordrecht.	1	2020	F; I; E	English
372	Padoch, C., Harwell, E. and Susanto, A., 1998. Swidden, sawah, and in-between: agricultural transformation in Borneo. Human Ecology, 26(1), pp.3-20.	1	1998	I	English
373	Pinto, C. and Alvarado, E., 2011. Lessons learned on fire management in Indigenous communities of Bolivia. FAO At The Vth International Wildland Fire Conference, Sun City, South Africa, 9-13 May 2011, pp. 107-117.	1	2011	Q	English
374	Snook, L.K., Alves, T., Sousa, C., Loo, J., Gratzer, G., Duguma, L., Schrotter, C., Ribeiro, N., Mahanzule, R., Mazuze, F. and Cuco, E., 2015. Relearning traditional knowledge to achieve sustainability: honey gathering in the miombo woodlands of northern Mozambique. XIV World Forestry Congress, Durban, South Africa, 7-11 September 2015.	1	2015	F; I; S	English
375	Tangjang, S., 2009. Traditional slash and burn agriculture as a historic land use practice: A case study from the ethnic noctes in Arunachal Pradesh, India. World Journal of Agricultural Sciences, 5(1), pp.70-73.	1	2009	I; S	English
376	Sonko, K., Samateh, S., Camara, K. and Beck, C. 2002. Why don’t they come and discuss together? Community-initiated stakeholder co-ordination on forest fire management in rural Gambia. In Communities in flames: Proceedings of an international conference on community involvement in fire management (pp.101-111). UN-FAO.	1	2002	O	English	Authors involved with project in focus community
377	Almada, E.D., Mendes, A.B.V. and Costa Filho, A., 2020. Burning reasons: traditional land management using fire and environmental conflicts in Serra da Canastra National Park, Minas Gerais, Brazil. In M. A. Ibarra, M. R. P. Vazquez, E. B. Baltazar and L.G. Araujo (Eds.) Socio-environmental regimes and local visions (pp. 205-224). Springer, Cham.	1	2020	Q; I; E; P; S	English
378	Bassett, T.J. and Zuéli, K.B., 2000. Environmental discourses and the Ivorian Savanna. Annals of the Association of American Geographers, 90(1), pp.67-95.	1	2000	F; Q; R; S; I; A	English
379	Sirois, M.C., Margolis, H.A. and Camiré, C., 1998. Influence of remnant trees on nutrients and fallow biomass in slash and burn agroecosystems in Guinea. Agroforestry systems, 40(3), pp.227-246.	1	1998	S	English
380	Papanastasis, V.P. and Kazaklis, A., 1998. Land use changes and conflicts in the Mediterranean-type ecosystems of western Crete. In P. W. Rundel, G. Montenegro and F. M. Jaksic, Landscape disturbance and biodiversity in Mediterranean-type ecosystems (pp. 141-154). Springer, Berlin, Heidelberg.	1	1998	R	English
381	Silvianingsih, Y.A., Hairiah, K., Suprayogo, D. and Van Noordwijk, M., 2020. Agroforests, swiddening and livelihoods between restored peat domes and river: effects of the 2015 fire ban in Central Kalimantan (Indonesia). International Forestry Review, 22(3), pp.382-396.	1	2020	I; E; Q	English
382	Aguilar-Fernández, R., Gavito, M.E., Peña-Claros, M., Pulleman, M. and Kuyper, T.W., 2020. Exploring linkages between supporting, regulating, and provisioning ecosystem services in rangelands in a tropical agro-forest frontier. Land, 9(12), p.511.	1	2020	I; S	English
383	Réau, B., 2002. Burning for zebu: the complexity of deforestation issues in western Madagascar. Norsk Geografisk Tidsskrift, 56(3), pp.219-229.	1	2002	R; E; I	English
384	Steward, A.M. and de Magalhães Lima, D., 2017. “We also preserve”: Quilombola defense of traditional plant management practices against preservationist bias in Mumbuca, Minas Gerais, Brazil. Journal of Ethnobiology, 37(1), pp.141-165.	1	2017	I; E; S	English
385	Milleville, P. and Blanc-Pamard, C., 2001. La culture prionniere du mais surabattis-bruslis (hatsaky) dans le sud-ouest de Madagascar. 1. Conduite des systemes de culture. In Razanaka, S., Grouzis, M., Milleville, P., Moizo, B., Aubry, C. (Eds), Sociétés paysannes, transitions agraires et dynamiques écologiques dans le Sud-Ouest de Madagascar, pp. 243-254. Antananarivo, IRD/CNRE.	1	2001	U	French	Research methods unclear, but research took place as part of the GEREM program
386	Niemeyer, F., 2011. Cultura e agricultura: resiliência e transformação do sistema agrícola krahô. Master's thesis, Universidade Estadual de Campinas.	1	2011	E	Portuguese
387	Dayrell, C.A., 1998. Geraizeiros e biodiversidade no Norte de Minas: a contribuição da agroecologia e da etnoecologia nos estudos dos agroecossistemas tradicionais. Master's thesis, Universidad Internacional de Andalucia.	1	1998	P; I; E	Portuguese
388.i	Lúcio, S.L.B., 2013. Gestão participativa e conflitos socioambientais em áreas protegidas no Cerrado mineiro: a pecuária de solta na RDS Veredas do Acari/MG. Master's thesis, Universisade de Brasilia.	3	2013	I; P; Q; R	Portuguese
388.ii	Lúcio, S.L.B., Pereira, L.E.C. and Ludewigs, T., 2014. O gado que circulava: desafios da gestão participativa e impactos da proibição do uso do fogo aos criadores de gado de solta da Reserva de Desenvolvimento Sustentável Veredas do Acari. Biodiversidade Brasileira, 4(1), pp.133-155.	3	2014	I; P; Q; R	Portuguese
388.iii	Eloy, L., Aubertin, C., Toni, F., Lúcio, S.L.B. and Bosgiraud, M., 2016. On the margins of soy farms: traditional populations and selective environmental policies in the Brazilian Cerrado. The Journal of Peasant Studies, 43(2), pp.494-516.	3	2016	E; I; P; R; A	English
389	Loboda, T.V. and Csiszar, I.A., 2007. Assessing the risk of ignition in the Russian Far East within a modeling framework of fire threat. Ecological Applications, 17(3), pp.791-805.	1	2007	R	English	Solely remote sensed study included because of low number of studies in the region
390	Hall, J.V., Loboda, T.V., Giglio, L. and McCarty, G.W., 2016. A MODIS-based burned area assessment for Russian croplands: Mapping requirements and challenges. Remote Sensing of Environment, 184, pp.506-521.	1	2016	R; Q	English
391	McCarty, J.L., Krylov, A., Prishchepov, A.V., Banach, D.M., Tyukavina, A., Potapov, P. and Turubanova, S., 2016. Agricultural fires in European Russia, Belarus, and Lithuania and their impact on air quality, 2002–2012. In G. Gutman and V. Radeloff (Eds.), Land-Cover and Land-Use Changes in Eastern Europe after the Collapse of the Soviet Union in 1991, pp. 193-221. Springer, Cham.	1	2016	R	English	Solely remote sensed study included because of low number of studies in the region
392	Dara, A., Baumann, M., Hölzel, N., Hostert, P., Kamp, J., Müller, D., Ullrich, B. and Kuemmerle, T., 2019. Post-soviet land-use change affected fire regimes on the Eurasian steppes. Ecosystems, pp.1-14.	1	2019	R	English	Solely remote sensed study included because of low number of studies in the region
393	Ribet, N., 2002. La maîtrise du feu: un travail " en creux" pour façonner les paysages. In Woronoff, D. (ed.) Travail et paysages, pp.167-198. Paris: Éditions du CTHS.	1	2002	E	French
394	Junqueira, A.B., Souza, N.B., Stomph, T.J., Almekinders, C.J., Clement, C.R. and Struik, P.C., 2016. Soil fertility gradients shape the agrobiodiversity of Amazonian homegardens. Agriculture, Ecosystems & Environment, 221, pp.270-281.	1	2016	S; P; I; E	English
395	Schroth, G., Da Mota, M.S.S., Lopes, R. and De Freitas, A.F., 2004. Extractive use, management and in situ domestication of a weedy palm, Astrocaryum tucuma, in the central Amazon. Forest Ecology and Management, 202(1-3), pp.161-179.	1	2004	S	English
396.i	Zent, E.M.L., 1999. Etnobotánica Hotì: explorando las interacciones entre la flora y el ser humano del Amazonas Venezolano. PhD thesis, University of Georgia.	2	1999	E; I; S	Spanish
396.ii	Zent, E. and Zent, S., 2004. Amazonian Indians as ecological disturbance agents: the Hotï of the Sierra Maigualida, Venezuelan Amazon. In T.S. Carlson and L. Maffi (Eds.) Ethnobotany and conservation of biocultural diversity. Advances in economic botany, 15, pp.79-112.	2	2004	E; I; S	English
397	Sheridan, R.A., 2014. Using a socio-ecological systems framework to develop a community fire plan in rural Mexico. Master's thesis, Northern Arizona University.	1	2014	S; P; E; I; Q	English
398	Fairhead, J. and Leach, M., 1996. Misreading the African landscape: society and ecology in a forest-savanna mosaic. Cambridge University Press.	1	1996	A; E; I; R	English
399.i	Kull, C.A., 2004. Isle of fire: the political ecology of landscape burning in Madagascar. University of Chicago press.	5	2004	E; A; I; Q	English
399.ii	Kull, C.A., 2002. Empowering pyromaniacs in Madagascar: ideology and legitimacy in community‐based natural resource management. Development and Change, 33(1), pp.57-78	5	2002	E; A; I; Q	English
399.iii	Kull, C.A., 2002. Madagascar aflame: landscape burning as peasant protest, resistance, or a resource management tool?. Political Geography, 21(7), pp.927-953	5	2002	E; A; I; Q	English
399.iv	Kull, C.A., 2002. Madagascar's burning issue: the persistent conflict over fire. Environment: Science and Policy for Sustainable Development, 44(3), pp.8-19	5	2002	E; A; I; Q	English
399.v	Kull, C.A., 2002. The “degraded” Tapia woodlands of highland Madagascar: rural economy, fire ecology, and forest conservation. Journal of Cultural Geography, 19(2), pp.95-128.	5	2002	E; A; I; Q	English
400	Nikolakis, W., Roberts, E., Hotte, N. and Ross, R.M., 2020. Goal setting and Indigenous fire management: a holistic perspective. International Journal of Wildland Fire, 29(11), pp.974-982.	1	2020	I	English
401	Pfund, J.L., 2001. Culture sur brûlis et gestion des ressources naturelles: évolution et perspectives de trois terroirs ruraux du versant Est de Madagascar. PhD thesis, ETH Zurich.	1	2001	S; I; R; F	French
402.i	Baird, I.G., Tubtim, K. and Baird, M., 1996. The Kavet and the Kreung: observations of livelihoods and natural resources in two highlander villages in the districts of Veun Say and Ta Veng, Ratanakhiri Province, Cambodia. Novib and Oxfam Livelihoods and Natural Resources Study.	2	1996	E; I	English
402.ii	Baird, I.G., 2013. The ethnoecology of the Kavet peoples in Northeast Cambodia. In Poffenberger, M (Ed.) Cambodia’s contested forest domain: the role of community forestry in the new millennium, pp. 155-186. Ateneo de Manila University Press, Quezon City.	2	2013	P; I; F	English
403	Upadhay, K.O., 1995. Shifting cultivation in Bhutan: a gradual approach to modifying land use patterns. FAO.	1	1995	Q; R; A; P	English
404	Monzón-Alvarado, C.M., Padilla Paz, S.E., 2015. Manejo de fuego en la Reserva de Biosfera Los Petenes: Diagnóstico inicial. PPY-CONANP. .	1	2015	I; A	Spanish
405	Ponce, E.L., Barrera, L.C. and Fernández, M.A., 2012. El sistema milpa roza, tumba y quema de los maya itzá de San Andrés y San José, Peten Guatemala. Ra Ximhai, 8(2.), pp.71-92.	1	2012	Q; I	Spanish
406	Monzón-Alvarado, C.M., Girón Solórzano. E.R., 2008. Evaluación de la situación del fuego en el altiplano central de Guatemala. The Nature conservancy and Vivamos Mejor Guatemala.	1	2008	I; A	Spanish
407.i	Monzón-Alvarado, C., 2008. Perspectiva multi-escala de los incendios forestales y la deforestación en el Parque Nacional Laguna del Tigre, Guatemala. Master's thesis, El Colegio de la Frontera Sur.	2	2008	R; I; E	Spanish
407.ii	Monzón-Alvarado, C., Cortina-Villar, S., Schmook, B., Flamenco-Sandoval, A., Christman, Z. and Arriola, L., 2012. Land-use decision-making after large-scale forest fires: analyzing fires as a driver of deforestation in Laguna del Tigre National Park, Guatemala. Applied Geography, 35(1-2), pp.43-52.	2	2012	R; I; E	English
408	Laney, R. and Turner, B.L., 2015. The persistence of self-provisioning among smallholder farmers in Northeast Madagascar. Human Ecology, 43(6), pp.811-826.	1	2015	I	English
409	Swamy, H.M., Seidu, M. and Singh, S.B., 2020. Issues of paddy stubble burning in Haryana: current perspective. Paddy and Water Environment, pp.1-15.	1	2020	R; Q; F	English
410	Molnár, Z., 2014. Perception and management of spatio-temporal pasture heterogeneity by Hungarian herders. Rangeland Ecology & Management, 67(2), pp.107-118.	1	2014	I	English
411	Davydov, V., 2014. Coming back to the same places: the ethnography of human-reindeer relations in the Northern Baikal region. Journal of Ethnology and Folkloristics, 8(2), pp.7-32.	1	2014	E	English
412	Stépanoff, C., 2012. Human-animal “joint commitment” in a reindeer herding system. Hau: Journal of ethnographic theory, 2(2), pp.287-312.	1	2012	E	English
413	Anderson, D.G., Ineshin, E.M., Kulagina, N.V., Lavento, M. and Vinkovskaya, O.P., 2014. Landscape agency and Evenki-Iakut reindeer husbandry along the Zhuia river, Eastern Siberia. Human Ecology, 42(2), pp.249-266.	1	2014	S; E; I	English
414	Vigilante, T., Bowman, D.M., Fisher, R., Russell‐Smith, J. and Yates, C., 2004. Contemporary landscape burning patterns in the far North Kimberley region of north‐west Australia: human influences and environmental determinants. Journal of Biogeography, 31(8), pp.1317-1333.	1	2004	R; S	English
415	Vigilante, T., Toohey, J., Gorring, A., Blundell, V., Saunders, T., Mangolamara, S., George, K., Oobagooma, J., Waina, M., Morgan, K. and Doohan, K., 2013. Island country: Aboriginal connections, values and knowledge of the Western Australian Kimberley islands in the context of an island biological survey. Records of the Western Australian Museum Supplement, 81, pp.145-181.	1	2013	P; I	English
416	Cubit, S., 1996. ‘Burning back with the snow’: traditional approaches to grassland management in Tasmania. Australian Geographical Studies, 34(2), pp.216-224.	1	1996	I	English
417	Walsh, F.J., 2008. To hunt and to hold: Martu Aboriginal people's uses and knowledge of their country, with implications for co-management in Karlamilyi (Rudall River) National Park and the Great Sandy Desert, Western Australia. PhD thesis, University of Western Australia.	1	2008	E; I	English
418	Perry, J.J., Sinclair, M., Wikmunea, H., Wolmby, S., Martin, D. and Martin, B., 2018. The divergence of traditional Aboriginal and contemporary fire management practices on Wik traditional lands, Cape York Peninsula, Northern Australia. Ecological Management & Restoration, 19(1), pp.24-31.	1	2018	E; P; I	English
419	Crowley, G.M. and Garnett, S.T., 2000. Changing fire management in the pastoral lands of Cape York Peninsula of northeast Australia, 1623 to 1996. Australian Geographical Studies, 38(1), pp.10-26.	1	2000	A; I; S	English
420	Prober, S.M., Yuen, E., O'Connor, M.H. and Schultz, L., 2016. Ngadju kala: Australian Aboriginal fire knowledge in the Great Western Woodlands. Austral Ecology, 41(7), pp.716-732.	1	2016	P; I; A	English
421	Johnston, F.H., Jacups, S.P., Vickery, A.J. and Bowman, D.M., 2007. Ecohealth and Aboriginal testimony of the nexus between human health and place. EcoHealth, 4(4), pp.489-499.	1	2007	I; E	English
422	Bowman, D.M.J.S., Garde, M. and Saulwick, A., 2001. Kunj-ken makka man-wurrk fire is for kangaroos: interpreting Aboriginal accounts of landscape burning in Central Arnhem Land. In A. Anderson, I. Lilley, and S. O'Connor (Eds.) Histories of old ages: essays in honour of Rhys Jones, pp. 61-78. Pandanus Books.	1	2001	I	English
423	Walsh, F.J., Cross, B., Wangkatjungka Aboriginal Corporation, Kupartiya Incorporated, Ngumpan Aboriginal Corporation and Dodnun community, 2004. Bushfires and burning: aspects of Aboriginal knowledge and practice in areas of the Kimberley. In Sustainable fire management for the Kimberley region of Western Australia. Report from Kimberley Regional Fire Management Project to Natural Heritage Trust,…	1	2004	I; P	English
424	Anzinger, D., 2002. Big huckleberry (Vaccinium membranaceum Dougl.) ecology and forest succession, Mt. Hood national forest and warm springs Indian reservation, Oregon. Master's thesis, Oregon State University.	1	2002	I; S	English
425	Wray, J. and Anderson, M.K., 2003. Restoring Indian-set fires to prairie ecosystems on the Olympic Peninsula. Ecological Restoration, 21(4), pp.296-301.	1	2003	I	English
426.i	Shebitz, D., 2005. Weaving traditional ecological knowledge into the restoration of basketry plants. Journal of Ecological Anthropology, 9(1), pp.51-68.	2	2005	I; S	English
426.ii	Peter, D. and Shebitz, D., 2006. Historic anthropogenically maintained bear grass savannas of the southeastern Olympic Peninsula. Restoration Ecology, 14(4), pp.605-615.	2	2006	I; S	English
427	Kunwar, R.P., Khaling, S.K., 2006. Forest fire in the Terai, Nepal: causes and community management interventions. International Forest Fire News, 34, pp. 46-54.	1	2006	I; F; P	English
428	Sahar, O., Leone, V., Limani, H., Rabia, N. and Meddour, R., 2018. Wildfire risk and its perception in Kabylia (Algeria). iForest-Biogeosciences and Forestry, 11(3), p.367-373	1	2018	Q	English
429	Cvitanović, M., Lučev, I., Fürst-Bjeliš, B., Borčić, L.S., Horvat, S. and Valožić, L., 2017. Analyzing post-socialist grassland conversion in a traditional agricultural landscape–Case study Croatia. Journal of rural studies, 51, pp.53-63.	1	2017	R; Q	English
430	Gupta, R., 2012. Causes of emissions from agricultural residue burning in north-west India: evaluation of a technology policy response. SANDEE working paper, No 66-12.	1	2012	Q	English
431	Erenstein, O., 2011. Cropping systems and crop residue management in the Trans-Gangetic Plains: issues and challenges for conservation agriculture from village surveys. Agricultural Systems, 104(1), pp.54-62.	1	2011	I	English
432	Erenstein, O., W. Thorpe, J. Singh, and A. Varma. 2007. Crop-livestock interactions and livelihoods in the Indo-Gangetic Plains, India: a regional synthesis. CIMMYT.	1	2007	F; I	English
433	Muliarta, I.N., 2018. Utilization burning rice straw and crops planted. International Journal of Life Sciences, 2(3), pp.142-150.	1	2018	Q	English
434	Theesfeld, I. and Jelinek, L., 2017. A misfit in policy to protect Russia’s black soil region. an institutional analytical lens applied to the ban on burning of crop residues. Land use policy, 67, pp.517-526.	1	2017	I	English
435	Renison, D., Cingolani, A.M. and Suarez, R., 2002. Efectos del fuego sobre un bosquecillo de Polylepis australis (Rosaceae) en las montañas de Córdoba, Argentina. Revista chilena de historia natural, 75(4), pp.719-727.	1	2002	S	Spanish
436	Hofstede, R.G., 1995. The effects of grazing and burning on soil and plant nutrient concentrations in Colombian páramo grasslands. Plant and Soil, 173(1), pp.111-132.	1	1995	I; S	English
437	Sühs, R.B., Giehl, E.L.H. and Peroni, N., 2020. Preventing traditional management can cause grassland loss within 30 years in southern Brazil. Scientific reports, 10(1), pp.1-9.	1	2020	I; R	English
438	Fort Nelson First Nation and Shifting Mosaics Consulting. 2015. Fort Nelson First Nation: interaction with fire and wood bison.	1	2015	I; P	English
439	Haider, M.Z., 2013. Determinants of rice residue burning in the field. Journal of environmental management, 128, pp.15-21.	1	2013	Q; F	English
440	Pant, K.P., 2013. Monetary incentives to reduce open-field rice-straw burning in the plains of Nepal. SANDEE Working Paper No 81-13.	1	2013	P; Q	English
441	Van, N.P.H., Nga, T.T., Arai, H., Hosen, Y., Chiem, N.H. and Inubushi, K., 2014. Rice straw management by farmers in a triple rice production system in the Mekong Delta, Viet Nam. Tropical Agriculture and Development, 58(4), pp.155-162.	1	2014	Q; S	English
442	Lasko, K., Vadrevu, K.P., Tran, V.T., Ellicott, E., Nguyen, T.T., Bui, H.Q. and Justice, C., 2017. Satellites may underestimate rice residue and associated burning emissions in Vietnam. Environmental Research Letters, 12(8), p.085006.	1	2017	R; S	English
443	Dube, E., 2015. Environmental challenges posed by veld fires in fragile regions: the case of the Bulilima and Mangwe districts in southern Zimbabwe. Jàmbá: Journal of Disaster Risk Studies, 7(1), pp. 1-8.	1	2015	I; Q	English
444	Rahman, S.A., Jacobsen, J.B., Healey, J.R., Roshetko, J.M. and Sunderland, T., 2017. Finding alternatives to swidden agriculture: does agroforestry improve livelihood options and reduce pressure on existing forest?. Agroforestry Systems, 91(1), pp.185-199.	1	2017	I; P; F; E	English
445	Yaro, J.A. and Tsikata, D., 2013. Savannah fires and local resistance to transnational land deals: the case of organic mango farming in Dipale, northern Ghana. African Geographical Review, 32(1), pp.72-87.	1	2013	I; F	English
446	Saha, S., 2002. Anthropogenic fire regime in a deciduous forest of central India. Current Science, pp.1144-1147.	1	2002	S	English
447	Dahlström, A., Iuga, A.M. and Lennartsson, T., 2013. Managing biodiversity rich hay meadows in the EU: a comparison of Swedish and Romanian grasslands. Environmental Conservation, 40(2), pp.194-205.	1	2013	I; R	English
448	Batista, E.K.L., Russell-Smith, J., França, H. and Figueira, J.E.C., 2018. An evaluation of contemporary savanna fire regimes in the Canastra National Park, Brazil: Outcomes of fire suppression policies. Journal of Environmental Management, 205, pp.40-49.	1	2018	R	English
449	Morello, T.F., Piketty, M.G., Gardner, T., Parry, L., Barlow, J., Ferreira, J. and Tancredi, N.S., 2018. Fertilizer adoption by smallholders in the Brazilian amazon: farm-level evidence. Ecological Economics, 144, pp.278-291.	1	2018	Q	English
450	Tindoy, R.M.S. and Lalican, N.M., 2009. Interrelationships of sugarcane production system components: the case of Tumalim, Nasugbu Batangas, Philippines. Philippine Journal of Crop Science (PJCS), 34(2), pp.78-92.	1	2009	I; P	English
451	Baloloy, A.B., Blanco, A.C., Gana, B.S., Ana, R.S. and Olalia, L.C., 2016. LANDSAT-based detection and severity analysis of burned sugarcane plots in Tarlac, Philippines using differenced normalized burn ratio (dNBR). The International Archives of Photogrammetry, Remote Sensing and Spatial Information Sciences, 42, p.173.	1	2016	R	English
452	Donga, T.K. and Eklo, O.M., 2018. Environmental load of pesticides used in conventional sugarcane production in Malawi. Crop Protection, 108, pp.71-77.	1	2018	I	English
453	Mwavu, E.N., Kalema, V.K., Bateganya, F., Byakagaba, P., Waiswa, D., Enuru, T. and Mbogga, M.S., 2018. Expansion of commercial sugarcane cultivation among smallholder farmers in Uganda: Implications for household food security. Land, 7(2), p.73.	1	2018	Q; R	English
454	Hongthong, P. and Patanothai, A., 2017. Variations in sugarcane yield among farmers’ fields and their causal factors in Northeast Thailand. International Journal of Plant Production, 11(4), pp.533-548.	1	2018	Q	English
455	Dean, M. R. U. 2019. Smallholder sugarcane growers, indigenous technical knowledge, and the sugar industry crisis in Fiji. PhD thesis, The University of Waikato.	1	2019	E; F; I; Q; A	English
456	Higgins, J.E., 1998. The political ecology of peasant sugarcane farming in northern Belize. PhD thesis, The University of Arizona.	1	1998	I; E; Q; A	English
457	Christianson, A. C., Caverley, N., Diabo, D.A., Ellsworth. K., Highway, B., Joe, J., Joudry, S., L'Hirondelle, L., Skead, W., Vandevord, M., Ault, R., 2020. Blazing the trail: celebrating Indigenous fire stewardship. FireSmart Canada.	1	2020	P; I	English
458	Joudry, S., 2016. Puktewei: learning from fire in Mi’kma’ki (Mi’kmaq Territory). Master's thesis, Dalhousie University.	1	2016	I; P	English
459	Sen, A. and Pattanaik, S., 2017. How can traditional livelihoods find a place in contemporary conservation politics debates in India? Understanding community perspectives in Sundarban, West Bengal. Journal of Political Ecology, 24(1), pp.861-880.	1	2017	E; I	English
460	Daeli, W., Carmenta, R., Monroe, M.C. and Adams, A.E., 2021. Where policy and culture collide: perceptions and responses of swidden farmers to the burn ban in West Kalimantan, Indonesia. Human Ecology, 49, pp.1-12.	1	2021	I	English
461	Dumez, R., 2004. L'Herbe et le feu dans le Parc national des Cévennes: pratiques de gestion et modes de catégorisation des éleveurs et des gestionnaires. PhD thesis, Paris, Muséum national d'histoire naturelle.	1	2004	I; A	French
462	Peller, H.A., 2021. Soil fertility, agroecology, and social change in southern Belize. PhD thesis, The Ohio State University.	1	2021	S; I; P; A; E	English
463	Tenzing, K., Millar, J. and Black, R., 2021. How property rights influence equity, efficiency and sustainability of high-altitude rangeland management in Bhutan. Pastoralism, 11(1), pp.1-13.	1	2021	I; F	English
464	Wang, F., Wang, M. and Yin, H., 2021. Can campaign‐style enforcement work: When and how? Evidence from straw burning control in China. Governance (2021), pp.1-20.	1	2020	R; I; Q	English
465	Waluyo, E.A., Ulya, N.A., Nurlia, A., Martin, E. and Rahmat, M., 2020. Community adaptation to the “zero burnings” policy on peatlands: cases in Rengas Merah-Riding and Senasih Mulya-Kayu Labu, Ogan Komering Ilir District, South Sumatra Province. IOP Conference Series: Earth and Environmental Science, 533(1), pp. 012009.	1	2020	I; F	English
466	Carroll, M.S., Edgeley, C.M. and Nugent, C., 2021. Traditional use of field burning in Ireland: history, culture and contemporary practice in the uplands. International Journal of Wildland Fire, (2021).	1	2021	F; I	English
467.i	Maclean, K. 2007. Creating spaces for negotiation at the environmental management and community development interface in Australia. PhD Thesis, The Australian National University.	3	2007	P; E; I; A	English
467.ii	Maclean, K. 2009. Re-conceptualising desert landscapes: unpacking historical narratives and contemporary realities for sustainable livelihood development in central Australia. Geoforum, 74(5), pp. 451–463.	3	2009	P; E; I; A	English
467.iii	Maclean, K. 2020. Managing fire in cross-cultural settings: a case study of fire in the southern Tanami desert, central Australia. In In Sustainable fire management for the Kimberley region of Western Australia. In A. Leavesley, M. Wouters, and R. Thornton (Eds.) Prescribed burning in Australasia: the science, practice and politics of burning the bush, pp. 33-46. Australasian Fire and Emergency S…	3	2020	P; E; I; A	English
468	Carpentaria Land Council Aboriginal Corporation. 2020. Jigija Indigenous fire training Program. In A. Leavesley, M. Wouters, and R. Thornton (Eds.) Prescribed burning in Australasia: the science, practice and politics of burning the bush, pp. 57-59. Australasian Fire and Emergency Service Authorities Council Limited.	1	2020	E	English	Written by practitioners, so I have counted the methodology as ethnography

## Sheet: Case
CID	FD	CO	LC	LC TYPE	LATITUDE	LONGITUDE	GR	ER	BI	SG	NO
1.a	1996-2003	South Africa	Khanyayo, area of former Bantustans (territory set aside for black people during apartheid), between the Mtentu and Msikaba Rivers, north-eastern Pondoland, Eastern Cape Province. This area includes the Mkambati Nature Reserve	R	-30.869	29.449	Khanyayo people who speak a Xhosa dialect (IsiMpondo), with diverse and complex livelihoods combining cropping (maize, taro, pumpkin, sweet potato) in fields or gardens of 1-2 hectares, livestock, and collection of natural resources. Over 50% households keep cattle, either as owners or through loaning agreements.	Drakensberg montane grasslands, woodlands and forests	Montane grasslands and shrublands	Throughout the 20th century, national legislation criminalised or discouraged vegetation burning by black and poor land users in Bastuchans. Historic and current national level fire legislation is primarily designed for commercial and private holding situations. This includes the Forestry Act (No.72 of 1968), Soil Conservation Act (No.76 of 1969) and current National Veld and Forest Fire Act (No.…
2.a	U	Mexico	Xocen, Yucatan	V1	20.599	-88.163	Yukatek Maya. Livelihoods centred around milpa swidden agriculture- open-field polyculture centered on maize that rotates with woodland vegetation	Yucatán dry forests	Tropical and subtropical dry broadleaf forests	U
3.a	2005-2007	Mexico	Lakandón settlement of Lacanjá Chansayab, Lacandon rainforest, northeast lowland Chiapas	V1	16.603	-90.914	Lakandón Maya, speaking Yukatek Maya. Livelihoods are centred around milpa- open field polyculture centered on maize that rotates with woodland vegetation. The Lakandón make use of secondary vegetation in various successional stages	Peten-Veracruz moist forests	Tropical and subtropical moist broadleaf forests	U
4.a	U	Mexico	Lacanha Chansayab, Chiapas	V1	16.603	-90.914	Lacandón Maya people. Livelihoods are centred around milpa- swidden agriculture centred on maize. During fallow periods the Lacandon use many forest resources for consumption and trade- the system is associated with the production of more than 50 different plant crops. They supplement their livelihoods with small-scale cattle raising, fishing, ecotourism and off farm labour. There are 52 farmers …	Peten-Veracruz moist forests	Tropical and subtropical moist broadleaf forests	State prohibition on cutting mature vegetation has been a factor in shortening fallow periods
5.a	2003	Mexico	Naja, Lacanja Chansayab and Metzobok villages, Lacandón rainforest, northeast lowland Chiapas	V23	16.821	-91.362	Lacandón Maya. Livelihoods are centred around milpa- swidden agriculture centered on maize that rotates with woodland vegetation. The Lacandón make use of secondary vegetation in various successional stages. Each successional stage produces over 25 types of crops, raw materials and medicines.	Peten-Veracruz moist forests	Tropical and subtropical moist broadleaf forests	U
6.a	U	Australia	Five savanna burning project areas in Arnhem Land: WALFA (Western Arnhem Land Fire Abatement), CALFA (Central Arnhem Land Fire Abatement), SEALFA (South East Arnhem Land Fire Abatement), SEALFA 2 (South East Arnhem Land Fire Abatement Stage 2), North East Arnhem Land Fire Abatement (NEALFA). These areas include four indigenous protected aras, the Djelk, Warddeken, South East Arnhem Land and Laynh…	R	-13.133	134.835	Traditional Owners of clan estates, and the Dkelk, Mimal, Jawoyn, Warddeken, Adjumarllarl, ASRAC, Yuyl Mangi, Numbilwar Numburindi and Yirralka aboriginal ranger groups (themselves traditional owners). In 2017 these groups employed 316 aboriginal rangers	Arnhem Land Tropical Savanna; Carpentaria Tropical Savanna	Tropical and subtropical grasslands, savannas, and shrublands	The Carbon Credits (Carbon Farming Initiative) Act 2011, subsequent Emissions Reduction Fund (ERF) legislation, and Carbon Farming Initiative – Emissions Abatement through Savanna Fire Management Methodology Determination 2015, enable registered fire projects to earn Australian Carbon Credit Units (ACCUs).
7.a	2014-2016	Indonesia	Study area is between Kapuas and Barito rivers, with the Mantangai River bisecting the area, Central Kalimantan province, Borneo. Area includes 5 river-based settlements of 822-1792 residents	V45	-2.367	114.5	Most inhabitants are indigenous Dayak, though there are some Banjar and Javanese who have married into the villages. Dominant livelihood is rubber tree cultivation. Other smallholder agriculture (rice, vegetables, perennial fruit trees), fishing, timber and non-timber forest extraction and gold and sand mining also contribute to livelihoods. Only a few residents work for oil palm companies, and t…	Southwest Borneo freshwater swamp forests	Tropical and subtropical moist broadleaf forests	Following widespread fires in 2015, all agricultural land burning has been banned by the national government. These regulations are reinforced at a provincial and local level, though with less enforcement.
8.a	2016-2017	Myanmar	Compartment number 49, 50, 51, 52, 53 and 55 in Pyu Kun Reserved Forest near S Village, Bago Mountains, at latitude 18° 51ʹ – 18° 54ʹ N and longitude 95° 51ʹ – 95° 54ʹ E. The Pyu Kun reserved forest belongs to the Pauk Kaung Township.	V1	18.875	95.875	Karen people, who are dependent on swidden agriculture. The principal crops are upland rice, sesame, cotton, chilli and a mixture of vegetables. Most cropping is for subsistence and seed saving, but a small amount of chilli and cotton are cultivated for sale.	Irrawaddy moist deciduous forests	Tropical and subtropical moist broadleaf forests	U
9.a	2016	India	Forests south of Kaziranga National Park in the northern hills of Karbi Anglong District, Central Assam	R	26.317	93.401	Karbi tribe, many people still practising traditional shifting cultivation (jhum) of upland rice, vegetables and cash crops such as ginger, chillies and sesame. Some farmers also grow paddy rice.	Meghalaya subtropical forests	Tropical and subtropical moist broadleaf forests	Despite national efforts by the Indian government to replace shifting agriculture with cash crop systems (rubber, tea, bamboo), the Assam state government has limited control over the autonomous district and its land use policies, allowing the Karbi farmers to practise their traditional Jhum system
10.a	2018	India	12 randomly-chosen villages in Karnal District, Haryana state	R	29.734	76.954	1230 rice farmers surveyed- a stratified sample based on landownership: approx 1/2 'marginal' farmers (farming less than 2 ha), 1/4 'medium' farmers (2-4 ha) and 1/4 'large' farmers (more than 10 ha).	Northwestern thorn scrub forests	Deserts and xeric shrublands	U
11.a	2019	Thailand	Mountain areas surrounding Chiang Mai city	R	18.788	98.985	Hill tribes and mountain people- no further information given	Kayah-Karen montane rain forests	Tropical and subtropical moist broadleaf forests	State interventions to reduce haze have prohibited burning by mountain people, hill tribes and farmers and have incentivised farming communities to change their modes of production.
12.a	2002-2006	Thailand	Mountainous areas and valleys of Chiang Mai province	R	18.729	98.557	Hill tribe people living in the mountainous districts surrounding Chiang Mai. There are 1,049 hill tribe villages in the Chiang Mai province, constituting 398,736 people or 23.82 % of its population. These include people of the Karen tribe, the Lahu (Musur) tribe, the Hmong (Meo) tribe, the Lisu tribe; the Lua tribe, the Akha tribe, the Mien (Yao) tribe, Palong tribe, Thai tribe, Thai Lue tribe; …	Kayah-Karen montane rain forests	Tropical and subtropical moist broadleaf forests	State policy on fires has been very centralised, taking a 'command and control approach'. This includes the Promotion and Maintenance of the National Environmental Quality Act of 2010, which sets out air quality standards; criminalising and legislating heavy penalties on individuals who start fire in the event that this caused damage; A disaster management plan with multiple agency responsibility…
13.a	2016, 2019	Australia	Settlement of Ngukurr, Southeast Arnhem Land Indigenous Protected Area,	V1	-14.733	134.732	Yugul Mangi rangers and elders (Traditional Owners). Yugul Mangi rangers started the South Arnhem Land Fire Abatement 2 Project in 2016 (SEALFA2)	Arnhem Land Tropical Savanna; Carpentaria Tropical Savanna	Tropical and subtropical grasslands, savannas, and shrublands	From the 1990s, community ranger groups and designation of indigenous protected areas facilitated reconnection of indigenous people to land management. From 1997 indigenous people, researchers and authorities began to work together to develop indigenous fire management programmes. By 2019 there were over 70 such burning projects in Northern Australia.
14.a	U	Nepal	Kandrang Valley, Chitwan District, Himalayan foothills	U	27.726	84.573	Chepang people	Himalayan subtropical broadleaf forests	Tropical and subtropical moist broadleaf forests	There has been government denial of indigenous land rights since forest management was brought under government control in 1957. Authorities have evicted indigenous peoples from their lands. The Forest Act of 1993 and Forest Regulations of 1996 do not recognise swidden as a legitimate form of forest management.
15.a	U	China	Northeast China: Heilongjiang, Jilin and Liaoning provinces, and four administrative units of the Mongolia Autonomous Region	R	44.238	125.467	Smallholder rice, corn and soy farmers (paper also discusses larger scale farmers)	U	U	The Chinese state banned rice straw burning in 2015 under the Law on the Prevention and Control of Atmospheric Pollution. This has been enforced, e.g. by detaining people. There has been little financial support to incentivise adoption of alternatives to straw burning
16.a	2011	Nepal	Langtang National Park, (28deg05.371' to 28deg05.660' N longitude and 85deg23.337' to 85deg23.517' E latitude)	U	28.236	85.494	Agropastoralist residents of Langtang national park	Eastern Himalayan alpine shrub and meadows	Montane grasslands and shrublands	Unauthorised anthropogenic fire in national parks is subject to a certain degree of regulation, but the local national park acknowledges the traditional practices of people in the park.
17.a	2018	Nigeria	Isiala Ngwa North Local Government Area, Abia State southeastern	R	5.287	7.417	Peasant subsistence farmers, also rearing livestock	Cross-Niger transition forests	Tropical and subtropical moist broadleaf forests	U
18.a	2015	Australia	Wattleridge Indigenous Protected Area, in the lands of the Banbai community	V1	-30.034	151.893	Banbai people/ Banbai rangers	Eastern Australian Temperate Forests	Temperate broadleaf and mixed forests	In the last decade Indigenous fire practices have been reinstated in Australia via the Greenhouse Gas Abatement Program. Most activity has been in northern Australia, not southern. In southeast Australia fire management remains mostly led by government agencies, but interest is growing in indigenous fire management. The local Government has started to design policies to support it, such as the 20…
19.a	2015-2017	Japan	Fujiwara District, Minakami Town, Gunma prefecture, Kanto Region	V45	36.897	139.082	Japanese mountain villagers, mixture of livelihoods- farming, business owners, waged work	Nihonkai montane deciduous forests	Temperate broadleaf and mixed forests	U
20.a	2005-2008; 2016	Ethiopia	Districts of Adaba, Dodola, Ashena Robe and Serofta, in a 50x25km area centred at 6deg49'N, 39deg15'E, Bale Mountains, Oromia Regional state	R	6.817	39.25	Agropastoral communities, speaking Oromo language, rearing cattle, horses and sheep (10% income), and growing barley, garlic, spring onions and cabbage (75 % of income), some also earn income from honey, bamboo, ecotourism and park employment.	Ethiopian montane moorlands; Ethiopian montane grasslands and woodlands	Montane grasslands and shrublands	Burning of all vegetation has been banned nationally since the mid-1970, according to the forest law. The penalty for igniting is imprisonment with large penalty fees, both inside and outside the park. There is stronger enforcement of this in the national park. Fire use is also targeted by the Bale Mountains Eco-region REDD+ project, which seeks to conserve biodiversity and sequester carbon throu…
21.a	2016	China	Jiangsu Province	R	33.14	119.789	Stratified sample of 382 farming households surveyed. Authors don’t indicate whether these are large farmers or smallholders, but assumption that some are smallholders.	Changjiang Plain evergreen forests; Huang He Plain mixed forests	Temperate broadleaf and mixed forests	The Government introduced a crop straw burning ban covering near rural areas in 1999, to be enforced by provincial governments. This was later extended to also cover rural areas. Local officials can be fined if straw burning occurs in their areas. There have also been incentive programs by some provincial governments, including Jiangsu, providing subsidies to farmers for retaining crop straws.
22.a	2015	Brazil	Municipalities of Paragominas, Ipixuna, São Domingos do Capim, and Irituia in the state of Pará	R	-2.34	-47.54	Smallholder farmers, 74% of them male, with an average landholding of 50 ha. 69% also owned pasture	Tocantins/Pindare moist forests	Tropical and subtropical moist broadleaf forests	The Brazilian Forest Code (Chap IX, law 12651/2012) is the main legislative tool for fire use and control. Para state has limited infrastructure and law enforcement. Payments for Ecosystem Services (PES) was pioneered in Brazil in 2003, and was recently relaunched wth the Bolsa verde program (2011) and Assentamentos Sustenaveis na Amazonia project (2015). These schemes seek to reduce deforestatio…
23.a	U	Indonesia	Villages of Sering, Kuala Tolam, Kuala Panduk, Teluk Binjai, teluk Meranti, Segamai, Benteng Hilir, Lalang Kabung, Kerumantan, Mak Teduh, Pangkalan Terap and Segati, Pangkalan Kerinci district, Riau province, Sumatra	R	0.348	101.866	Rural communities, practising swidden agriculture as well as more sedentary agriculture (oil palm, rubber). Half of the villages were part of a fire reduction incentive project, half were not	Sumatran Peat Swamp forests	Tropical and subtropical moist broadleaf forests	The Government of Indonesia has attempted to reduce incidence of fires by introducing new regulations since the 1980s. 1995 Decree No 188/KeptsII/1995 established the National Centre for Forest Fire Control. The National Coordinating Team for Forest and Land Fire Control established under the 1999 Act No. 41 banned corporations from clearing land for oil palm plantation using fire. In addition to…
24.a	2014-2019	USA	Yurok and Karuk ancestral lands, around Klamath river, Northwest California	R	41.235	-123.692	Yurok and Karuk tribes, including basketweavers	Klamath-Siskiyou forests	Temperate coniferous forests	In 1905, the USDA Forest Service initiated fire exclusion policies to protect timber commodities and built structures, and by the 1920s, these policies had solidified throughout the State of California to exclude cultural burning. By the 1990s, US federal land management agencies revised their fire policies to recognize the potential benefits of prescribed fires as a management tool. In Karuk ter…
25.a	2015-2018	Australia	Northern Territory, incl Arnhem Land	R	-19.491	132.551	Indigenous people in the Northern Territory	Arnhem Land Tropical Savanna	Tropical and subtropical grasslands, savannas, and shrublands	Since 2010, Australia has had government accredited methods for counting carbon credits generated from strategic bushfire management in tropical savannas and more than 70 projects have been established using this methodology, including many on indigenous lands. Credits cannot be generated from areas with Gamba grass (an invasive grass species) and its current extent rules out the potential for su…
26.a	2018	Croatia	Sibenik-Knin County and Split-Dalmatia County, Dalmatia	R	43.746	16.353	Farmers (unclear whether they are smallholders)	Illyrian deciduous forests; Dinaric Mountains mixed forests	Mediterranean forests, woodlands, and shrub; Temperate broadleaf and mixed forests	There is a state ban on burning in summer
27.a	2016	USA	Indiana Summit Research Natural Area, Glass Mountains, Inyo National Forest	V23	37.798	-118.91	Bishop Paiute and Mono Lake Kutzadika (Northern Paiute Tribes)	Sierra Nevada forests	Temperate coniferous forests	State legislation supports collaboration between state forest management agencies and Tribes for forest management, in this case in a National Research Area
28.a	U	Mexico	Lacanja Chansayab, Chiapas, 15 deg 45'42.073'' N, 91 deg 7'39.817'' W	V1	16.603	-90.914	Lacandon Maya. Livelihoods centred around milpa- swidden agriculture centred on maize. All stages of agroforest system provide resources, including for hunting, medicines, timber and foods	Peten-Veracruz moist forests	Tropical and subtropical moist broadleaf forests	U
29.a	2014, 2015, 2017	Panama	San Pedro, Penonomé district, Coclé Province	V1	8.761	-80.292	People of mixed indigenous, European, and other origins. They identify themselves as campesinos - rural small-scale farmers. Upland rice (native to Asia, but important crop for indigenous people in Panama since the late 1500s), maize and cassava, are grown in swidden plots, along with vegetables and groundfood. Villages also derive income from non-agricultural activities in the village, such as w…	Isthmian-Pacific moist forests	Tropical and subtropical moist broadleaf forests	After the economic crisis in the 1980s in Latin America, government-led development policies were changed in favor of policies based on a neoliberal economy and the liberalization of markets was promoted, which led to widespread cash crop cultivation in rural areas, at the expense of swidden agriculture. The Panamanian Government claims that swidden agriculture causes deforestation because of cut…
30.a	2017, 2018	Mexico	Four ejidos in Calakmul, Campeche, Yucatan peninsula, established in the 1980s and 1960s, bordering the Calakmul Biosphere Reserve	V45	18.504	-89.396	Smallholder farmers practising swidden agriculture- maize intercropped with squash and beans. Smallholders have diversified their livelihoods to engage in cash-cropping (chili), beekeeping, small-scale cattle ranching, labour migration to tourist areas and community based forestry (in largest ejidos). Government subsidies account for ave 44% of household income (some related to agriculture).	Yucatán moist forests	Tropical and subtropical moist broadleaf forests	Establishment of Calakmul Biosphere Reserve in 1989 reduced land available for agriculture in ejidos (farming is prohibited in the Reserve's core zone). Conservation-development programs were established to promote diversification of swidden-based livelihoods and to convince smallholders to set aside ejido land for voluntary conservation. Structural adjustments and trade liberalisation after the …
31.a	2017	Australia	Dja Dja Wurrung country (ancestral territory), in the area between the settlements of Bendigo, Ballarat, Boort and Donald, in Victoria state	V45	-36.769	143.398	Dja Dja Wurrung people	Murray-Darling woodlands and mallee; Southeast Australia temperate savanna; Southeast Australia temperate forests	Mediterranean forests, woodlands, and shrub; Temperate grasslands, savannas, and shrublands; Temperate broadleaf and mixed forests	Aboriginal peoples in southeast Australia have had less opportunity to remain on their ancestral territories than in Northern Australia, giving them fewer opportunities to maintain the traditional practices and forms of occupation by which settler law recognises Aboriginal land rights. Aboriginal peoples interacting with settler land management agencies in the southeast today do so as smaller dem…
32.a	1993-2013	Guinea-Bissau	Bafata and Gabú administrative regions, Mansaba and Farim sectors of Oio and Quebo sector of Tombali (Authors' Fire-region 1)	R	12.19	-14.53	Fula and Mandinga peoples, practising swidden agriculture of sorghum, millet and peanuts, and freshwater swamp rice farming. There have been intermediate levels of conversion of swidden cultivation fields into cashew orchards and there are high levels of pastoral activities. The Fula are the main cattle herders, though only a sub-group of the fula can be considered true pastoralists.	Guinean forest-savanna mosaic	Tropical and subtropical grasslands, savannas, and shrublands	During colonial times, scholars and agricultural experts criticised swidden agriculture and fire practices. The forest bylaw of 1963 stipulated that agricultural and forest services should provide technical assistance to smallholders and try to eliminate swidden agriculture. After Independence (1974), criticism of swidden continued, but no collaborative actions were conducted to develop agrofores…
32.b	1993-2013	Guinea-Bissau	Nhacra, Mansoa and Bissora sectors of Oio administrative region (Authors' Fire-region 2)	R	12.145	-15.312	Balanta people, practising fresh water and mangrove swamp rice farming system and swidden agriculture of rice, sorghum, millet and peanuts. There have been high levels of conversion of swidden cultivation fields into cashew plantations. There are low levels of pastoral acitivities.	Guinean forest-savanna mosaic	Tropical and subtropical grasslands, savannas, and shrublands	During colonial times, scholars and agricultural experts criticised swidden agriculture and fire practices. The forest bylaw of 1963 stipulated that agricultural and forest services should provide technical assistance to smallholders and try to eliminate swidden agriculture. After Independence (1974), criticism of swidden continued, but no collaborative actions were conducted to develop agrofores…
32.c	1993-2013	Guinea-Bissau	Cacheu and Biombo administrative regions (Authors' Fire-region 3)	R	12.153	-15.937	Manjaco, Pepel and Felupe (minority group in S. Domingos sector) peoples, practising fresh water and mangrove swamp rice farming system and swidden agriculture of rice, sorghum, millet and peanuts. There have been high levels of conversion of swidden cultivation fields into cashew plantations. There are low levels of pastoral acitivities.	Guinean forest-savanna mosaic	Tropical and subtropical grasslands, savannas, and shrublands	During colonial times, scholars and agricultural experts criticised swidden agriculture and fire practices. The forest bylaw of 1963 stipulated that agricultural and forest services should provide technical assistance to smallholders and try to eliminate swidden agriculture. After Independence (1974), criticism of swidden continued, but no collaborative actions were conducted to develop agrofores…
32.d	1993-2013	Guinea-Bissau	Quinara region (Authors' fire region 4)	R	11.702	-15.017	Beafada and Balanta (migrant) peoples, practising mangrove swamp rice and swidden agriculture of rice and peanuts in polyculture. There is also fruit and cola nut production in agroforestry systems. There have been high levels of conversion of swidden cultivation fields into cashew plantations. There are intermediate levels of pastoral acitivities.	Guinean forest-savanna mosaic	Tropical and subtropical grasslands, savannas, and shrublands	During colonial times, scholars and agricultural experts criticised swidden agriculture and fire practices. The forest bylaw of 1963 stipulated that agricultural and forest services should provide technical assistance to smallholders and try to eliminate swidden agriculture. After Independence (1974), criticism of swidden continued, but no collaborative actions were conducted to develop agrofores…
32.e	1993-2013	Guinea-Bissau	Bedanda, Catio and Cacine sectors of Tombali (Authors' fire region 5)	R	11.352	-15.078	Nalu and Balanta (migrant) peoples, practising mangrove swamp rice and swidden agriculture of rice and peanuts in polyculture. Fruit production in agroforestry. There is also fruit and cola nut production in agroforestry systems. There have been low levels of conversion of swidden cultivation fields into cashew plantations. There are intermediate levels of pastoral acitivities.	Guinean forest-savanna mosaic	Tropical and subtropical grasslands, savannas, and shrublands	During colonial times, scholars and agricultural experts criticised swidden agriculture and fire practices. The forest bylaw of 1963 stipulated that agricultural and forest services should provide technical assistance to smallholders and try to eliminate swidden agriculture. After Independence (1974), criticism of swidden continued, but no collaborative actions were conducted to develop agrofores…
33.a	2016	Panama	Playitas neighbourhood, corregimiento of Guabal, Veraguas Province	V1	8.728	-80.991	Ngöbe and/or Buglé indigenous people, whose livelihoods are based on swidden agriculture, including plantain, banana, yucca and yams, also gathering medicinal and edible plants, hunting and fishing	Isthmian-Pacific moist forests	Tropical and subtropical moist broadleaf forests	There are laws limiting burning.
34.a	2015	USA	Western side of Colville National Forest and surrounding areas, Washington state (see map p3)	V1	48.97	-118.065	Confederated Colville Tribes, Spokane Tribe and Kalispel Tribe (all part of Interior Salish linguistic family)	Okanogan dry forests	Temperate coniferous forests	The Colville National Forest was established in 1907. Indigenous reservations were delimited in the 19th and 20th centuries, but tribes are striving for improved access and co-management of their ancestral lands out side of these reservations. Knowledge of the local tribes has not been routinely incorporated into fuels treatments on the Colville National Forest
35.a	2017	Australia	Yellowmundee Regional Park, Darug Country, between the outskirts of Penrith and the Blue Mountains National Park, western Sydney	V1	-33.688	150.653	Darug people.	Eastern Australian temperate forests	Temperate broadleaf and mixed forests	Natural resource management policies and practices in Australia are gradually shifting to recognise Indigenous knowledges, including in fire management. This has been through joint management of national parks, the introduction of Indigenous ranger programs, and the designation of Indigenous Protected Areas . Yet this recognition within policies and practices has often been protracted and challen…
36.a	2015	Vietnam	Yen Dong commune (Nam Dinh Province)	V45	20.264	106.072	Smallholder farmers of the Kinh ethnic group, practicing three cropping systems: spring peanuts—summer rice—potatoes, spring peanuts—summer rice, and spring rice—summer rice. Some also keep cattle. Most income in the area come from arable farming	Red River freshwater swamp forests	Tropical and subtropical moist broadleaf forests	U	This province has the largest area under spring/summer rice in the Red River Delta
36.b	2015	Vietnam	Luong Phong Commune (Bac Giang Province)	R	21.342	106.014	Smallholder farmers of the Kinh ethnic group practising three cropping systems: spring rice—summer rice—maize, spring rice—summer rice—sweet potato, and spring rice—summer rice. A major share of livelihoods in the area also stems from wage labour in local factories. (90 percent of arable land in Vietnam is used for rice cultivation, with median landholding size of 0.65 ha, making smallholders the…	South China-Vietnam subtropical evergreen forests	Tropical and subtropical moist broadleaf forests	U	This province has the largest area under spring/summer rice in the midlands and northern mountains of Thailand
37.a	U	Colombia	El Duya, Paravare, and San Juanito indigenous reservations, Municipality of Orocué, Department of Casanare	V23	4.881	-71.268	Sáliva people, cultivating cassava, ranching cattle and horses	Llanos	Tropical and subtropical grasslands, savannas, and shrublands	U
38.a	U	Colombia	Indigenous resguardo of El Vergel, 54 km northwest of Leticia city (Leticia Municipality, Amazonas Department)	V1	-3.851	-70.218	Ticuna people, practising chagra, a swidden system, involving cyclical use of the rainforest	Solimões-Japurá moist forests	Tropical and subtropical moist broadleaf forests	State subsidy programs, and state programs to retrain people for work in tourism have reduced the time spent on traditional chagra agriculture, and have driven changes in in chagra system that have included the omission of burning. The State has granted the Ticuna legal land rights since 1983 when the indigenous reservation was declared.
39.a	2012-2014	Brazil	10 communities in the Mamiraua and Amanã Sustainable Development Reserves, Middle Solimoes region, Amazonas state	R	-2.668	-64.808	Ribeirinhos (rural dwellers of mixed cultural backgrounds- Indigenous, European and African- who emerged as a social group during Portuguese colonisation). These are smallholder families engaged in various productive activities including swidden agriculture (main crop manioc), fishing, hunting, timber and non-timber forest product extraction.	Purus varzeá; Japurá-Solimoes-Negro moist forests	Tropical and subtropical moist broadleaf forests	There have been strong anti fire policies since 1997/1998 megafires. In early 2000s, fire-free agriculture or 'best practice fire management' was promoted through international partnerships. Since 2009, there has been a return to a 'command and control' approach, with fire restrictions, such as the 2011 Forest Act requiring burn licenses. Both Sustainable Development Reserves are managed by the C…
39.b	2010	Brazil	6 communities in the Tapajos-Arapiuns RESEX; Arapiuns region, Para state	R	-3.064	-55.529	Smallholder farmers	Madeira-Tapajós moist forests	Tropical and subtropical moist broadleaf forests	There have been strong anti fire policies since 1997/1998 megafires. In early 2000s, fire-free agriculture or 'best practice fire management' was promoted through international partnerships. Since 2009, there has been a return to a 'command and control' approach, with fire restrictions, such as the 2011 Forest Act requiring burn licenses. This is an sustainable use extractive reserve (RESEX) in w…
39.c	2012-2013	Brazil	16 communities in Paragominas, Para state	R	-3.002	-47.353	Smallholders settled on public land (95 percent of the private land in the area is held by 500 large landholders who do pasture and soy agriculture)	Tocantins/Pindare moist forests	Tropical and subtropical moist broadleaf forests	There have been strong anti fire policies since 1997/1998 megafires. In early 2000s, fire-free agriculture or 'best practice fire management' was promoted through international partnerships. Since 2009, there has been a return to a 'command and control' approach, with fire restrictions, such as the 2011 Forest Act requiring burn licenses. In this area a Green Municipality Pact was established in …
40.a	2013	Bolivia	Communities of San Andres, San Fermin, Limoncito and Quitunuquina in Municipalities of Concepcion and Robore, Chiquitania region, Department of Santa Cruz	V45	-17.011	-61.112	Indigenous communities, practising mainly shifting cultivation (chaqueo) on communal land, for subsistence, also growing cash crops and keeping cattle. Also intercultural communities- recently established by migrants from highland areas, where chaqueo was not used as a traditional production practice. Intercultural communities practice agriculture for subsistence and commerce. The area occupied b…	Chiquitano dry forests; Beni Savanna	Tropical and subtropical dry broadleaf forests; Tropical and subtropical grasslands, savannas, and shrublands	The Bolivian Forest Law of 1996, and Resolution N302 of 2012 on Enforcement and Control of Land and Forests, regulate agricultural fire use. These allow a household in a rural community (i.e. located in communal land) to clear 3 to 5 ha per year depending on the land use category, and if not in permanent forestland. In permanent forestland, deforestation cannot exceed 5 ha accumulated historicall…
41.a	2016-2019	Sweden	Malå municipality, Västerbotten County; Concession herding communities of Sattajärvi, Tärendö, Korju and Muonio, Norrbotten County; Sirges, Jahjagasska, Tuorpon, Udtja and Slakka communities in Jokkmokk municipality, Norrbotten County	R	66.637	19.717	Sami people, practising reindeer husbandry, for which they rely on lichens as the main food source for reindeer in winter. Within herding communities, the herders undertake transhumance between summer and winter pasture areas. They have rights of use over territories but mostly owned by public and private forestry companies, which are encroaching on winter grazing territories	Scandinavian and Russian taiga	Boreal forests/taiga	After over a century of fire suppression (from 1860), with limited use of fire as a soil preparation measure to regenerate Scot's pine forests, since the 1990s fire has been recognised as an essential component of the boreal forest, and there has been a renewed interest in fire in the context of nature conservations. New policies promote reintroduction of fire in commercial and protected forests.…
42.a	2016	India	Three villages in Kolasib and Lai Autonomous District Council of Lawngtlai, Mizoram State	V23	23.42	92.735	The case study villages include people from the Mizo, Chakma, Reang (Bru) and Lai tribes, who practice jhum (swidden agriculture, involving intercropping of vegetables, herbs and wild medicines). The state owns the land in Mizoram, and jhum is done on land certificates or pattas issued by Village Councils, which do not hold legal status.	Mizoram-Manipur-Kachin rain forests	Tropical and subtropical moist broadleaf forests	A unique legal administrative provision sets Mizoram apart from the rest of India- Article 371(G) of the Consitution gives special autonomy to the state legislatures of Mizoram, to protect the majority indigenous population and culture, recognise customary laws and land tenure systems. The District Councils have special powers to regulate the practice of jhum. There was hope that the 2006 Forest …
43.a	2005-2010	India	Biligiri Rangaswamy Temple Tiger Reserve, Western Ghats	R	12	77.139	Soliga people, who practised swidden agriculture and kept livestock until the area became a wildlife sanctuary. They are now sedentary, working on coffee estates and growing monoculture cash crops like coffee.	South Deccan Plateau dry deciduous forests; South Western Ghats moist deciduous forests	Tropical and subtropical dry broadleaf forests; Tropical and subtropical moist broadleaf forests	In 1865 the colonial British government enacted the Indian Forest Act, which created forest reserces in which grazing, swidden agriculture, fire management were regulated. From the late 1960s the Indian state developed new conservation policy, including the Wildlife Protection Act 1972, to mandate the establishment of national parks and wildlife sanctuaries managed by the Forest Department. Under…
44.a	U	Brazil	Quilombolas of São Pedro and Pedro Cubas de Cima in Eldorado-SP municipality, Ribeira Valley, between cities of Sao Paulo and Curitiba	V23	-24.47	-48.306	Quilombola communities (afro-Brazilian resident of quilombo settlements first established by escaped slaves in Brazil). Practising swidden agriculture, with some people transitioning to peach palm cash crop	Serra do Mar coastal forests	Tropical and subtropical moist broadleaf forests	The Forest Laws (Federal Law 11.428/2006 and Federal Decree 6.600/2008) forbid clearing land for agriculture unless in the first stages of succession (no older than 10 years). There are incentive policies to support transition to commercial cash cropping.
45.a	U	Spain	Nansa Valley, Cantabrian Mountains	R	43.231	-4.425	Traditional cattle-based economy, with emphasis on the autochthonous Tudanca breed	Cantabrian mixed forests	Temperate broadleaf and mixed forests	Paper discusses state regulation in 18th and 19th centuries, but it is not clear whether these regulations remain today or how they have changed
46.a	2015-2016	Kenya	Gathiuru forest, Mount Kenya Forest Reserve (part of Mount Kenya World Heritage Site)	V45	-0.098	37.123	Villagers surrounding and within Gathiuru Forest Reserve, combining cultivation, livestock grazing and forest resources- timber, firewood, medicinal herbs and honey collecting. Some community members conduct casual jobs in forestry plantations for wage labour	East African montane forests	Tropical and subtropical moist broadleaf forests	The 1977 hunting ban in Kenya also made fire use for hunting illegal. The Kenya Grass Fire Act, Cap 327, provides for prescribed burning of bushes, shrubs, grass, crops, and stubble within protected areas, but the Kenya Forest Service and Kenya Wildfire Service have continued to practice fire suppression campaigns within forests and national parks. In 2014 the government passed the Fire and Disas…
47.a	U	Myanmar	Kyauk Pon Village, Ywaa Ngan Township, Taunggyi District, Shan State	V1	21.178	96.501	Indigenous Danu tribe, practising swidden agriculture with upland rice, peanuts, niger, maize, sunflowers, potatos. Coffee and tea are also grown	Northern Indochina subtropical forests	Tropical and subtropical moist broadleaf forests	U
48.a	2013	Tanzania	Ibingu village, Kilosa District, Morogoro Region, 6deg8' S and 36deg7' E	V1	-6.133	36.117	Wasagala ethnic group, but also migrant Wakaguru, Wagogo, Watiliko and Wahehe people, practising small-scale farming of rice for subsistence and some sale of surplus production. Rice, cassava, sugar cane, vegetables, banana and beans are cultivated in fields around homesteads and valleys. Shifting cultivation of beans, maize and sorghum is carried out on hill slopes. Pig rearing is also an import…	Southern Acacia-Commiphora bushlands and thickets	Tropical and subtropical grasslands, savannas, and shrublands	Land tenure laws promote intensive over shifting agriculture. In 2011 an area of the village was reserved and included in a REDD+ project, making swidden agriculture illegal in that area. The villagers cultivating that land were relocated to a new sub-village and encouraged to abandon swidden.
48.b	2013	Tanzania	Ilakala village, Kilosa District, Morogoro Region, 7deg2' S and 36 deg 9' E	V1	-7.033	36.15	Wasagala, Waluguru and Wavidunda people, also migrant Wangoni,Waha, Warundi, Wahehe, Wabena, Wapangwa, Wapogoro, Wafipa, Wachaga, Wagogo, Wangindo, Wandenduele, Warangi, Wasukuma, Wamasai and Wabarbaig people. Until early 1980s most villagers were labourers on sisal plantations. When the sisal market declined, small-scale cotton cultivation was introduced but failed. Cashew nut and orange fruit c…	Southern Acacia-Commiphora bushlands and thickets	Tropical and subtropical grasslands, savannas, and shrublands	Land tenure laws promote intensive over shifting agriculture
49.a	U	Indonesia	Un-named village in Kapuas Hulu Regency, West Kalimantan, Borneo	V1	0.834	113.001	Swidden rice farmers, mostly identifying as Dayak Tamambaloh people. Wage labor opportunities are very limited in the area	U	U	Article 69 of Law 32 of 2009 about the Protection and Management of the Living Environment prohibits the use of fire to clear land but provides an exemption for the cultivation of local crop varieties on areas smaller than 2ha per household that are managed in accordance with local wisdom, incl. a fire break. A 2010 regulation clarifies that this exemption does not hold in conditions of below-nor…
50.a	2013	Canada	Community of Lytton- land adjacent to the Stein Valley Nlaka'pamux Heritage Park, at the confluence of the Thompson and Fraser Rivers, British Columbia	V1	50.257	-121.584	Community of Lytton, many of whom are involved in the forestry, agriculture or ranching industries.	Cascade Mountains leeward forests	Temperate coniferous forests	European settlement in British Columbia effectively removed indigenous burning as provicial authorities were encouraged to curb fire use, and government forestry excluded fire. By mid-1900s large-scale traditional burns were no longer permitted. In past 35 years land managers sought to reintroduce fire. Since 2003, provincial policies have allowed Lytton First Nation inhabitants to burn. The Brit…
51.a	2014-2015	Indonesia	Tabanio and Ujung Batu villages, Tanah Laut Regency, South Kalimantan, Borneo	V23	-3.742	114.649	Most villagers work as farmers and fisherfolk (some both). Farmers produce corn, beans, lentils, cassava, dry rice and cash crops like coconut, cashew, cocoa, cinnamon, coffee, ruber and palm oil. Village elites are smallholder palm oil producers	Southwest Borneo freshwater swamp forests	Tropical and subtropical moist broadleaf forests	From 1967-1998, the Suharto administration enacted laws that shifted natural resource governance from Indigenous management to centralised public and private management. The post-Suharto governments have adopted more decentralised policies of natural resource management, but this has generally strengthened the hold of oil palm agribusiness. The Basic Agrarian Law claims to support adat or common …
52.a	2010-2014	Mexico	Calakmul municipality, Campeche	R	18.504	-89.396	Milpa swidden farmers, many of whom have migrated from other Mexican states like Chiapas and Veracruz. The population is increasingly incorporated into markets through chili cash cropping, cattle production, beekeeping, and hired labour, but most households still practice swidden as a means of subsistence and sociocultural reproduction. The main products of the milpa system are maize, beans and s…	Yucatán moist forests	Tropical and subtropical moist broadleaf forests	Burning is regulated by the Law for Burning in the State of Campeche (Government of the State of Campeche, 1993; Congress of the State of Campeche 2015) and the Official Mexican Norm for the use of fire in forest and agricultural lands: NOM-015 SEMARNAT / SAGARPA-2007. These stipulate various conditions for burning- it must take place between 4 and 11am, must not take place when wind speeds excee…
53.a	U	Brazil	Queimadas municipality, region of Planalto da Borborema, Agreste paraibana, Campina Grande, Paraiba State	U	-7.362	-35.9	Smallholder farmers	Caatinga	Deserts and xeric shrublands	The 2003 Fire Statute issued by Paraiba State prohibits burning forests and other forms of vegetation for preparing land for agriculture. A state owned technical assistance and rural extension company EMATER was established in 1975, which is supposed to disseminate technical knowledge to farmers for more intensive agriculture
54.a	2011-2017	Australia	Northern Australia, crossing Northern Territory, Western Australia and Queensland	R	-19.491	132.551	Aboriginal people	U	U	U
55.a	U	Brazil	Sao Mateus watershed, municipality of Biguacu, Santa Catarina State (27 deg 23' S to 27 deg 28' S; 48 deg 44' W to 48 deg 49' W)	V45	-27.433	-48.783	Mainly Portuguese and German speakers, but also some people of African origin, traditionally practising swidden (known as roca de toco), though this is declining, and Eucalyptus plantations and pasture are replacing it. 80 % of farms in the area are smaller than 20 ha	Serra do Mar coastal forests	Tropical and subtropical moist broadleaf forests	Forest regulations date to 1965, but new Mata Atlantic Decree 750 (1993) and Atlantic Forest Act (2006), prohibit the clearing of mid and late successional vegetation, thus, in practice, preventing farmers from continuing their swidden-fallow. Various direct and indirect government incentives have been offered to promote transition to Eucalyptus plantations
56.a	U	Mexico	Juquila Vijanos municipality, Villa Alta District, Sierra Norte mountain range, Oaxaca state	U	17.356	-96.305	Smallholder farmers practising milpa swidden agriculture- a polyculture of maize, bean and squashes. This is being replaced by semi-permanent cropping systems	Oaxacan montane forests	Tropical and subtropical moist broadleaf forests	Local environmental policies, motivated by government economic incentives, have driven the replacement of milpa swidden agriculture with a semi-permanent cropping system
57.a	2013-2015	USA	California (focus on Western Mono ancestral territory in central Sierra Nevada, but also consultations with tribal practioners from other regions)	R	37.106	-119.085	Californian tribes	Sierra Nevada forests	Temperate coniferous forests	Most tribes in the Sierra Nevada rely on access to national forests to gather traditional resources because they were historically dispossessed of their ancestral forestlands. Traditional fire use was also suppressed. Today, air quality regulations still pose obstacles to expanding use of prescribed burning, including cultural burning by tribes. There are, however attempts at partnership between …
58.a	1994, 1995, 2007	Peru	Community located on a river bluff overlooking the Amazon river, a day's travel by boat from the city of Iquitos (given a pseudonym in the papers)	V1	-3.744	-73.252	People are known as 'riberenos' or 'river people'- spanish-speaking people of mixed Iberian and Amerindian ancestry (mestizos). The community was founded to labour on a rubber estate in 1800s, but collapse of rubber prices in 1900s and finally dissolution of the estate in the 1970s, meant population turned to agriculture, fishing and non-timber forest products. People practise market-oriented and…	Iquitos varzeá	Tropical and subtropical moist broadleaf forests	U
59.a	2010	Ghana	21 communities across the districts of East Manprusi; Ejura, Sekyere East, Nkoranza, Atebubu, Kwahu East, North Tongu and Ketu South in 5 regions across the Guinea Savanna zone (Northern region), transition zone (Ashanti and Ahafo) and coastal savanna zone (Eastern region and Volta)	R	8.415	-1.439	Smallholder maize farmers	U	U	Different agricultural intensification technologies have been extended to farmers over the years by both governmental and nongovernmental organisations.
60.a	2015	Nepal	Villages of Chamaita, Naya Bazar, Pyang and Jirmale, Ilam district	V45	26.952	88.004	The largest ethnic group in the region is the Rai, followed by the Brahmin, Limbu, Tamang, Chhetri and Dalit, Gurung and Sherpa. This paper focuses on farmers producing cardamom as a cash crop. Other cash crops and subsistence crops, including potatoes and maize are also grown	Eastern Himalayan broadleaf forests; Himalayan subtropical broadleaf forests	Temperate broadleaf and mixed forests; Tropical and subtropical moist broadleaf forests	U
61.a	2015	Indonesia	10 sites in Benkalis, Dumai, Rokan Hulu and Rokan Hilir Districts, Riau Province, Sumatra	R	1.49	101.27	Communities of Malay, Sakai people and immigrants from North Sumatra, West Sumatra and Java	Sumatran peat swamp forests	Tropical and subtropical moist broadleaf forests	The Peatland Conversion Moratorium of 2015 and establishment of the Peatland Restoration Agency in 2016 were government responses to dramatic peatfires in 2015. The Governor of Riau also proposed blocking 1000 canals to reduce wildfire risk
62.a	U	Madagascar	Andasibe and Ambatovola communities in southern Ankeniheny Zahamena Corridor (newly established protected area and REDD+ pilot area)	V23	-18.892	48.366	Peasants practising swidden agriculture, known locally as tavy, producing rice and root crops	Madagascar lowland forests	Tropical and subtropical moist broadleaf forests	Governmental and NGOs have attempted to slow or stop the practice of swidden agriculture. Recently the Malagasy Government committed under the United Nations Framework Convention on Climate Change to reforest 170,000 ha with native species and greatly decrease the national rate of deforestation. At the study site, a reforestation project 'Tetik Asa Mampody Savoka', involving Conservation Internat…
63.a	2015	Nigeria	Girei Local Government Area, Adamawa State, between 9 deg 11' to 9 deg 39' North and 12 deg 11' to 12 deg 49' East	R	9.417	12.5	Fulani pastoralist communities, mostly nomadic (practising extensive system of management). This is a minority group in the area	West Sudanian savanna; Guinean forest-savanna mosaic	Tropical and subtropical grasslands, savannas, and shrublands	U
64.a	2014-2015	USA	Moist mixed conifer zone within the Greater Warm Springs Reservation Area (including the Warm Springs Reservation and adjacent forest areas south of the Columbia River, between 44 deg 30' N - 45 deg 45' N and 122 deg 0' W - 121 deg 15' W), Eastern Cascades of Oregon.	R	44.625	-121.75	Confederated Tribes of Warm Springs (CTWS)	Central and Southern Cascades forests; Eastern Cascades forests	Temperate coniferous forests	The study area historically included two tribal reservations: the Klamath and Warm Springs. Until the early 20th century, east Cascades tribes applied controlled fire to promote culturally important products, such as huckleberry shrubs. The Klamath Tribes lost federal recognition and their reservation lands in 1954 under the Klamath Termination Act. They regained federal recognition, but not thei…
65.a	2014	New Zealand	5,530 ha of land north and east of Tokerau Beach to the Cape Karikari, including the community/township of Whatuwhiwhi, Karikari Peninsula, Far North District	V1	-34.851	173.404	Maori people (54% of population in the area). The local iwi (tribe) are predominantly Ngāti Kahu	Northland temperate kauri forests	Temperate broadleaf and mixed forests	The New Zealand National Rural Fire Authority (NRFA) sets standards for fire control in forest and rural areas, while leaving operational fire control to local Rural Fire Authorities (RFAs) and Enlarged rural Fire Districts (ERFDs). New Zealand has a system of three fire seasons: Open season, where the use of fire is unrestricted, Restricted season, where a fire permit is required from the RFA an…
66.a	2013-2014	Mexico	Tonaya and El Temazcal villages, River Ayuquila basin, Jalisco state	V23	19.752	-104.02	Smallholder farmers, practising swidden agriculture as a secondary production activity to complement more intensive cultivation of rainfed or irrigated permanent plots. Maize, beans and squash are grown in swidden plots	Jalisco dry forests	Tropical and subtropical dry broadleaf forests	Programa de Apoyos Directos al Campo (PROCAMPO) is a grant paid to small farmers across Mexico- the money is paid only if the land is under cultivation or pasture, and land can only be registered once, which means it is in the farmers' financial interest to reduce the length of fallows. In addition to PROCAMPO, farmers have, in recent years, been able to obtain subsidies for inputs such as fertil…
67.a	2013	Japan	Research area is in the regions of Atsumi and Sanpoku, on the boundary between the prefectures of Niigata and Yamagata, approximately 20 km from the Sea of Japan, in Tohoku, Northeastern Japan	R	38.509	139.643	The region's economy was traditionally centered on logging, cropping in paddues on the valley floors and cultivating assorted grains and turnips through swidden agriculture in the mountain forests. The forest industry has collapsed, but the tradition of swidden agriculture remains. Today, swidden focuses on red turnip. Of those farmers producing red turnip through swidden, 55 % do so solely for t…	Nihonkai montane deciduous forests; Nihonkai evergreen forests	Temperate broadleaf and mixed forests	As a result of modernisation, and the restrictions of the Forest Act of 1897, and promotion of policies of reforestation, swidden agriculture is only retained in very few areas of Japan.
68.a	2009-2014	USA	Klamath Basin, Northern California	R	41.55	-123.514	The Karuk tribe. Karuk people continue to harvest subsistence foods from the forest and river, including salmon.	Klamath-Siskiyou forests	Temperate coniferous forests	The Karuk tribe have a history of displacement from their ancestral territory, but retain strong connection to their homelands. The Karuk ancestral territory is largely National forest Land. While the tribe is federally recognised by the US government, the Karuk do not have a reservation. A small number of tribal trust lands are scattered throughout the territory. As part of this history of displ…
69.a	2010-2011	Japan	15 meadows on the Kaida Plateau, 35 deg 56' N, 137 deg 36' E, Nagano Prefecture, Japan	V1	35.933	137.6	Little information given	Taiheiyo montane deciduous forests	Temperate broadleaf and mixed forests	U
70.a	1999-2010	Australia	Martu communities of Parnngurr, Punmu and Kunawarritji, Martu Native Title Lands, including the Karlamilyi National Park. (ethnographic focus on Parnngurr)	V23	-22.413	122.849	Martu people. While wild foods are somewhat less important today than historically, foraging trips to "dinner-time camps" within 50 km of Parnngurr occur almost daily, and extended camps to more distant locales are common, especially during the cool-dry season or Wandajarra (May - August). Although most people at Parnngurr would like to hunt nearly every day, adults and children over 5 in Parnngu…	Great Sandy-Tanami desert	Deserts and xeric shrublands	U
71.a	U	Australia	Western Cape York region, the Gulf of Carpentaria and Central Arnhem Land	R	-17.42	137.586	Aboriginal traditional owners and land managers	Arnhem Land Tropical Savanna; Carpentaria Tropical Savanna; Cape York Peninsula Tropical Savanna	Tropical and subtropical grasslands, savannas, and shrublands	Colonial processes resulted in the broad-scale removal, disenfranchisement or enticement of Aboriginal people from their customary lands. Recently, National law for a Carbon Farming Initiative (CFI) has established methods for reducing volumes of greenhouse gases (nitrous oxide and methane) released in the burning of grassy fuels, leaf litter and fine woody fuels. Aboriginal communities and their…
72.a	2012-2013	Philippines	Villages of Burgos, Joson, General Luna and San Agustin, Carranglan municipality, Nueva Ecija province, Island of Luzon (15 deg 59'42'' N, 121 deg 1'40''E)	V45	15.96	121.063	Mostly upland smallholder farmers, growing crops in agroforestry systems and keeping livestock. Some people work as hired laborers or engage in non-farm small businesses, or as government employees.	Luzon rain forests	Tropical and subtropical moist broadleaf forests	Forest managers and decision makers have adopted a fire suppression policy. There have been a number of grassland reforestation projects in the area since 1938, mostly implemented by the Department of Environment and Natural Resources. Some have also included agroforestry establishment. Because of fire, many reforestation areas still have grassland as the major land cover.
73.a	U	Sierra Leone	16 unnamed farming communities across the ecotones of the Freetown Peninsula	R	8.371	-13.168	Swidden farmers, some having adopted agroforestry systems- alley cropping, boundary systems and silvopasture as an alternative. Rice,cassava, yam, coco-yam, sweet potato, beans, mazie and plantain are the dominant crops. Charcoal production for sale to the city of Freetown. A small number of households practice small-scale animal husbandry	Western Guinean lowland forests	Tropical and subtropical moist broadleaf forests	Alley farming has been promoted by Government and NGOs as an alternative to swidden. This largely amounts to awareness raising- there are no farm subsidies, inputs or credit provided to help farmers to adopt alley cropping.
74.a	2011-2013	Brazil	Villages of Vila Siao, Sao Francisco, Jauarituba, Monte Carmelo and Agrovila on the margins of the Tefe river and its tributaries, middle Amazon River, Amazonas	V45	-3.875	-65.05	Caboclo people, who cultivate swiddens in non-flooded areas. The region is one of the largest producers of cassava flour in the Brazilian Amazon, and this is the main activity in these villages.	Purus varzeá; Juruá-Purus moist forests	Tropical and subtropical moist broadleaf forests	U
75.a	2009-2010	Brazil	Communities of Boa Esperanca and Nova Jerusalem in the Amanã Sustainable Development Reserve, Middle Solimoes region, Amazonas	V23	-2.648	-64.668	Mostly small farmers and fishermen living in traditional riverside communities. Hunting and extractivism are practised alongside farming and fishing. Agriculture is for subsistence and sale (cassava)	Japurá-Solimoes-Negro moist forests; Purus varzeá	Tropical and subtropical moist broadleaf forests	U
76.a	U	Ethiopia	Wondo Genet Forest, Central Rift Valley, (7deg 06' N, 38 deg 37' E)	U	7.1	38.617	Pastoral communities	Ethiopian montane forests	Tropical and subtropical moist broadleaf forests	U
77.a	n/a	Thailand	Nan Province	R	18.776	100.773	Most of the lowlands are peopled by Thai people, whereas the highlands and mountainous territories are populated by diverse ethnic groups including the Lua, Khmong, Mien and Khmu	Northern Thailand-Laos moist deciduous forests; Luang Prabang montane rain forests	Tropical and subtropical moist broadleaf forests	Significant areas of common lands where tribal populations traditionally practiced swidden, have been converted to 'protected territories', where traditional land use practices are prohibited. In 1998 property rights were given to local inhabitants provided they could prove occupancy before the areas were declared protected. This has motivated a transition to permanent agriculture
78.a	2010	Madagascar	Ambendrana, Forest corridor of Fianarantsoa	V1	-21.379	47.309	Betsileo people, living mainly from agriculture and livestock rearing. Crops grown include maize, bean, cassava, sweet potato, ground nut, Vouandjou, sugar cane, rice. A variety of crops will be grown in successive cultivation cycles in the same plot.	Madagascar subhumid forests	Tropical and subtropical moist broadleaf forests	U
78.b	2010	Madagascar	Sahabe, Forest corridor of Fianarantsoa	V1	-21.918	47.207	Betsileo people, living mainly from agriculture and livestock rearing. Crops grown include maize, bean, cassava, sweet potato, ground nut, Vouandjou, sugar cane, rice. A variety of crops will be grown in successive cultivation cycles in the same plot.	Madagascar subhumid forests	Tropical and subtropical moist broadleaf forests	U
78.c	2010	Madagascar	Ambalavelo, Forest corridor of Fianarantsoa	V1	-21.503	47.439	Tanala people, living mainly from agriculture and livestock rearing. Crops grown include maize, bean, cassava, sweet potato, ground nut, Vouandjou, sugar cane, rice. A variety of crops will be grown in successive cultivation cycles in the same plot.	Madagascar subhumid forests	Tropical and subtropical moist broadleaf forests	U
79.a	2009-2010	Mozambique	Ruaca	V1	-18.85	31.567	Mixed crop-livestock system, less intensive crop production than Murehwa in Zimbabwe. 25% of households own cattle and cattle ownership ranges from 0 to more than 7 livestock units. Traditional crops are maize, sorghum, pearl millet, pigeon pea and cowpea. Some farmers occasionally sell their labour	Southern Miombo woodlands	Tropical and subtropical grasslands, savannas, and shrublands	U
79.b	2009-2010	Mozambique	Gorongosa	V1	-18.687	34.072	Crop-based system with few livestock. Traditional crops are maize, sorghum, pearl millet, pigeon pea and cowpea. Some farmers occasionally sell their labour	Southern Miombo woodlands	Tropical and subtropical grasslands, savannas, and shrublands	U
79.c	2009-2010	Zimbabwe	Murehwa	V1	-17.65	31.779	Mixed crop-livestock system, more intensive crop production than Ruaca in Mozambique. 40% of households own cattle and ownership differs among households from 0 to more than 7 livestock units. Those who own livestock use manure to improve crop productivity. Maize is the main staple crop, with groundnut, sweet potato and sunflower also important	Southern Miombo woodlands	Tropical and subtropical grasslands, savannas, and shrublands	U
80.a	2004-2009	Burkina Faso	Study region around the forest of Tui in western Burkina Faso, with particular focus on the Tui Loop- the area including the villages of Farakui, Wani, Bihoun, Wionbo, Koura, Woro, Kandeni and Popiho, and the town of Wakuy	R	11.73	-3.635	The main ethnic groups and longest settled in the area are the Bobo, Bwa and Gourunsi (with mostly Bwa people in the more detailed study region). To the southeast of the area there are also Pougouli, Birifor and Dagara people. There are also Marka people in the area around Safane, and Mossi settlers who arrived in the area in the 1960s. There are also Peul people who practice sedentary or nomadic…	West Sudanian savanna	Tropical and subtropical grasslands, savannas, and shrublands	There are laws restricting burning to the early dry season. Fires are also prohibited in protected areas. The colonial administration promoted the development of the cotton industry in Burkina Faso in the 20th century. From 1926-1940 it was made compulsory for every village to cultivate an area of cotton. From the late 1940s policies were less coercive and focused on incentivising cotton producti…	The study region is a transition zone between the North and South Sudanese domains. In the north the rains are shorter and there is a lower cumulative rainfall. Generally fires are smaller and fewer in number outside protected areas, due to a high proportion of agricultural land in the landscape and reduction of fuel by grazing. Outside protected areas fires are also most common at the peripherie…
81.a	2012	Madagascar	Communities of Amparihimena, Antsahantitra and Somisika in Makira National Park and communities of Taratra, Belanonana and Ravinala in the Ankeniheny-Zahamena Corridor protected area	R	-16.422	49.409	Betsimisaraka people and people of other ethnic groups. Farmers use three agricultural systems: permanent rice cultication on lowlands (horaka), swidden rice cultivation on forested slopes (tavy) and perennial and semi-perennial cropping (tanety). Rice is generally associated with crops like maize, pumpkin, legumes and may be followed by a tuber crop like yam or cassava. 84% of tavy crop producti…	Madagascar lowland forests	Tropical and subtropical moist broadleaf forests	Tavy has been banned since 1881, in the French colonial era. In 2003, the Madagascan Government decided to triple the size of protected areas to reduce deforestation, and 40 % of the remaining natural forests were allocated protected areas. To persuade local populations to comply with the protected areas, the Government, with international support and NGOs support implemented management transfer …
82.a	U	Pakistan	10 villages in each of Sialkot and Gujranwala Districts, Punjab Province	R	32.343	74.355	Wheat is the major rabi crop (Nov-April) and the major kharif crop (May-Oct) is rice. Most farmers are smallholders (with less than 2 ha of land), only a small percentage are large landowners with more than 8 ha. Farmers rely on canal or tubewell irrigation	Northwestern thorn scrub forests; Western Himalayan subalpine conifer forests; Baluchistan xeric woodlands	Deserts and xeric shrublands; Temperate coniferous forests	U
83.a	U	Nigeria	Communities of Oyan, Okuku, Asi, Asaba, Ijabe and Ila Odo, Odo-Otin Local Government Area, Osun State	R	8.035	4.741	Fulani pastoralists. The majority of people in the area as Yoruba speaking peoples. Fulani pastoralists are a minority group- there are many arable farmers growing cassava, yam, maize, millet, sweet potato, race and others for subsistence and cash crops. 87% of farmers have less than 5 ha land	Nigerian lowland forests	Tropical and subtropical moist broadleaf forests	U
84.a	2012-2013	Spain	Municipalities of Casillas, autonomous community of Castilla y León, and Rozas de Puerto Real, autonomous community of Madrid	V23	40.317	-4.538	Rural inhabitants practising traditional management of chestnut ecosystems. Casillas has lower family income and municipality expenditure than Rozas, with a smaller proportion of the local population employed in the service sector and a greater proportion in agriculture.	Iberian sclerophyllous and semi-deciduous forests; Northwest Iberian montane forests	Mediterranean forests, woodlands, and shrub	State policies have focused on fire suppression and exclusion. The state requires fire users to apply for a permit before burning, and pay a fee for it. Expenditure on fire exclusion is 5 times higher in Rozas than Casillas
85.a	2013-2014	Mexico	Monarch Butterfly Biosphere Reserve (outermost coordinates of 19deg 44' 27'' and 19deg18' 32'' northern latitude, 100deg22' 26'' and 100deg09' 07'' western longitude), between states of Michoacan and Estado de Mexico	R	19.517	-100.25	People living inside and around the reserve. Most of the land inside the reserve is in communal land tenure, including ejidos and Indigenous communities of the Mazahua and Otomi ethnic groups. The main activities are related to agriculture (the main activity of 91% of households), livestock production forestry and tourism. Agriculture is rainfed and practised on 0.5-2 ha plots, with little techni…	Trans-Mexican Volcanic Belt pine-oak forests	Tropical and subtropical coniferous forests	Use of fire by local inhabitants has been blamed as being the main cause of forest fires and forest fires have been identified as the main threat to forests in the Monarch Butterfuly Biosphere Reserve. There are also federal and state regulations on fire use (not clearly described in the paper)
86.a	2006-2010	Gabon	Ekouyi-Mbouma, Lewou, Kebiri and Saaye villages, close to the Parc National Plateaux Bateke	V45	-1.585	14.115	Teke-Alima people, relying on forest and savanna resources through hunting, gathering, and subsistence agriculture. Small-scale goat herds are also maintained in the villages, though these are not grazed in the wider landscape	Western Congolian forest-savanna mosaic	Tropical and subtropical grasslands, savannas, and shrublands	The French colonial state replaced land chiefs with nominated traditional authorities to extend state rule over villages, preventing land chiefs from exercising traditional authority over fire use. Laws regulating hunting were introduced in 1929 and regulated hunting technology, forbidding fire use for hunting. Later laws introduced hunting seasons and hunting zones and banned commercial hunting.…
87.a	1989, 1991, 1992, 1997	USA	Chaparral environments in the Sierrra Nevada of California. See map p. 8 for territories of California Indian groups at the time of European contact	R	38.342	-120.286	Descendents of the Mono Tribe	Sierra Nevada forests	Temperate coniferous forests	U
87.b	1989, 1991 1992	USA	Chaparral environments in the Sierrra Nevada of California. See map p. 8 for territories of California Indian groups at the time of European contact	R	38.342	-120.286	Descendents of the Chukchansi Tribe	Sierra Nevada forests	Temperate coniferous forests	U
87.c	1989, 1992	USA	Chaparral environments in the Sierrra Nevada of California. See map p. 8 for territories of California Indian groups at the time of European contact	R	38.342	-120.286	Descendents of the Choynumni Tribe	Sierra Nevada forests	Temperate coniferous forests	U
87.d	1989, 1990	USA	Chaparral environments in the Sierrra Nevada of California. See map p. 8 for territories of California Indian groups at the time of European contact	R	38.342	-120.286	Descendents of the Sierra Miwok Tribe	Sierra Nevada forests	Temperate coniferous forests	U
87.e	1992, 1997, 2006	USA	Chaparral environments in the Sierrra Nevada of California. See map p. 8 for territories of California Indian groups at the time of European contact	R	38.342	-120.286	Descendents of the Dumna Tribe	Sierra Nevada forests	Temperate coniferous forests	U
88.a	2008-2014	USA	Spring Mountains National Recreation Area (SMNRA), within Nuwuvi ancestral lands in Nevada (Nuwuvi ancestral lands and reservations extend across state boundaries of California, Nevada, Arizona and Utah)	R	36.23	-115.598	Nuwuvi (also known as Nuwu or Southern Paiute) people	Mojave desert; Great Basin montane forests	Deserts and xeric shrublands; Temperate coniferous forests	Colonisation led to the loss of traditional practices and removal of the Nuwuvi from their ancestral lands. From the 1860s, Nuwuvi were reorganised onto reservations by the federal government. From 1890 to the 1980s Nuwuvi children were forced to attend education institutions that barred indigenous languages. Todau Nuwuvi ancestral lands are a patchwork of federal and state lands, private holding…
89.a	1998-2000, 2002, 2003, 2006, 2007, 2011	Mali	Southern edge of Soudan savanna belt in southern Mali, mostly within the Koulihoro district.	R	12.165	-8.401	Bambara and Malinke people who pursue an agropastoral economy, often sharing their land with Fulani herders. Most people are smallholder famers, growing sorghum, millet, peanuts, beans, cow peas, cotton and maize. Tree orchards of cashew, mango, Shea and Nere are also common, and most farmers hold some livestock	West Sudanian savanna	Tropical and subtropical grasslands, savannas, and shrublands	The French colonial government sought to suppress fire, following a conservationist policy on lands settled and controlled by villagers and an exclusion policy in unpopulated and designated protected areas. The Forest Service was est. in 1935 by the French gov. In 1950-1960 official policy shifted towards seeing fire as a necessary evil. The policy did not ban savanna burning or rotational agricu…
90.a	2009-2010	Australia	Community of Ngukurr, southeastern Arnhem Land, Northern Territory	V1	-14.733	134.732	Indigenous community of Ngukurr. In the northern Australian savanna region, Indigenous Australians collectively own about half the land and represent half the total population. They regularly hunt, fish and collect bush foods at weekends in the savanna but purchase most of their food.	Carpentaria tropical savanna	Tropical and subtropical grasslands, savannas, and shrublands	The colonisation of Australia progressively caused a decline or cessation of indigenous burning practices, particularly over the northern savanna region. Since the 1970s, the Aboriginal self-determination policy has seen the Government attempt to enrol Indigenous Australians in conservation and land management. In 2001-2002 a ranger group was established in Ngukurr.
91.a	1999-2007	Australia	Kakadu National Park, Arnhem land, Northern Territory	R	-13.092	132.394	Aboriginal people	Arnhem Land tropical savanna	Tropical and subtropical grasslands, savannas, and shrublands	Aboriginal depopulation on colonisation dramatically reduced Aboriginal burning. Kakadu National Park was designated in 1979, and institutional fire management began, with the goal of re-establishing patterns of traditional Aboriginal burning to reduce wildfire risk and create habitat diversity, with a focus on early dry season burning. As a national park, Kakadu is subject to the Northern Territ…
91.b	1999-2007	Australia	Western Arnhem Land Fire Abatement Project area on the Arnhem plateau, Northern Territory	R	-13.248	133.308	Aboriginal people	Arnhem Land tropical savanna	Tropical and subtropical grasslands, savannas, and shrublands	The Western Arnhem Land Fire Abatement Project (WALFA) is the first project outside of Kakadu National Park to begin implementing large-scale fire management with substantive input from indigenous people, and has become the model for other indigenous abatement projects. These projects are funded by emissions reduction agreements with private partners as well as government schemes such as the Aust…
92.a	2004-2013	Brazil	Pimentel Barbosa and Etenhiritipa villages in the Pimentel Barbosa Indigenous Reserve	V23	-13.321	-51.675	Xavante people. The Xavante subsistence system can be characterised as a combination of gathering, hunting, fishing and farming. Livestock farming and cash cropping have been introduced since the 1950s	Cerrado	Tropical and subtropical grasslands, savannas, and shrublands	The Xavante were forced to leave their ancestral territory known as Wedezé during the colonial period. In the early 1970s they gained rights to the Terra Indigena Pimentel Barbosa, but this is only a small part of their ancestral territory. These Xavante communities are involved in heated political struggles to regain legal access to traditional territories outside of the current narrowly defined…
92.b	U	Brazil	Marãiwatsédé Indigenous Reserve, Mato Grosso State	V23	-11.704	-51.624	Xavante people	Mato Grosso seasonal forests	Tropical and subtropical moist broadleaf forests	The Xavante of Marãiwatsédé were forcibly removed from their lands in 1966 and only permitted to return in 2013. There has been a move to rethink Cerrado conservation strategies in recent years, including a major public policy shift from zero fire tolerance to the promotion of pilot projects aimed at developing integrated fire management. Significant advances have been acheived through the Cerrad…
93.a	2005-2012	Brazil	Town of Isabel de Rio Negro, Amazonas state	V1	-0.493	-64.929	Indigenous people farming in outskirts of urban area. In this study Desana, Tukanoan, Piratapuia, Baniwa, and Bare people were interviewed. Most Indigenous famillies along the river Amazon resort to multi-sited land use in order to gain access to urban good and services while maintaining productive activities and social relationships in their villages. Urban migrants usually have to reconfigure s…	Negro-Branco moist forests; Japurá-Solimoes-Negro moist forests	Tropical and subtropical moist broadleaf forests	In November 2010 the Institute of National Historic and Artistic Heritage (IPHAN) recognised the traditional agricultural system of the Rio Negro as intangible heritage of the Brazilian nation under the terms of Decree 3551/2000. This recognition entails the establishment of a safeguarding plan, defined through mutual agreement between the three main Amerindian associations in the Rio Negro – the…
93.b	2005-2012	Brazil	Small forest communities (Tapereira and Espirito Santo) on the banks of the Rio Negro River and its tributaries, Amazonas state. Some of the area includes registered Indigenous Lands (Terras Indigenas)	V23	-0.38	-63.74	Twenty different Indigenous groups of three major language families (Arawak, Tukano and Maku), live along the Rio Negro river. In this study Desana, Tukanoan, Piratapuia, Baniwa, and Bare people were interviewed. Most Indigenous famillies along the river resort to multi-sited land use in order to gain access to urban good and services while maintaining productive activities and social relationshi…	Negro-Branco moist forests; Japurá-Solimoes-Negro moist forests	Tropical and subtropical moist broadleaf forests	In November 2010 the Institute of National Historic and Artistic Heritage (IPHAN) recognised the traditional agricultural system of the Rio Negro as intangible heritage of the Brazilian nation under the terms of Decree 3551/2000. This recognition entails the establishment of a safeguarding plan, defined through mutual agreement between the three main Amerindian associations in the Rio Negro – the…
94.a	U	India	14 villages in the Chittoor District, in the northern part of the Sadhukonda Reserved Forest, close to the city of Madanapalle, Andhra Pradesh	R	13.479	78.838	People in the area earn their livelihoods through agriculture, forest product collection and wage labour	Deccan thorn scrub forests	Deserts and xeric shrublands	Setting fire is a punishable offence in India.
95.a	U	Australia	New South Wales	R	-31.253	146.921	Indigenous women and men who are land stewards within state agencies	U	U	U
95.b	U	Australia	Queensland	R	-20.918	142.703	Indigenous women and men who are land stewards within state agencies	U	U	U
95.c	U	USA	California	R	36.778	-119.418	Indigenous women and men who are land stewards within state agencies	U	U	U
96.a	2010	China	Villages of Daoba, Xiaolinhe, Anzhai, Libi, Lijia'ao, Wujiazhuang, Xi'ao, Xiaosai, Gukou and Huangdoujing in Shanxi province	R	37.243	111.857	Rural farmers	Guizhou Plateau broadleaf and mixed forests; Yunnan Plateau subtropical evergreen forests	Tropical and subtropical moist broadleaf forests	The Chinese Government sees biomass combution (indoor and in fields) as a challenge to sustainable development. It has announced policies to promote sustainable biomass use – such as renewable energy and forage to feed animals – in order to reduce field burning of biomass.
96.b	2011	China	Villages of Youngfeng, Yubei, Longshang, Xishufu, Miaoyan, Bogumen, Shibanyan, Xinmin, Hebian and Jinhou in Zhejiang province	R	29.142	119.789	Rural farmers	Changjiang Plain evergreen forests; Jian Nan subtropical evergreen forests	Temperate broadleaf and mixed forests; Tropical and subtropical moist broadleaf forests	The Chinese Government sees biomass combution (indoor and in fields) as a challenge to sustainable development. It has announced policies to promote sustainable biomass use – such as renewable energy and forage to feed animals – in order to reduce field burning of biomass.
96.c	2011	China	Villages of Gongqing, Huaihua, Nuoshi, Shitang, Mali, Machang, Shiudong, Chujiashan, Pingchu and Xiaochangba in Guizhou province	R	26.843	107.29	Rural farmers	Central China loess plateau mixed forests; Huang He Plain mixed forests	Temperate broadleaf and mixed forests	The Chinese Government sees biomass combution (indoor and in fields) as a challenge to sustainable development. It has announced policies to promote sustainable biomass use – such as renewable energy and forage to feed animals – in order to reduce field burning of biomass.
97.a	2003-2016	India	30 villages in Punjab state	R	31.147	75.341	Rural farmers, most following a rice-wheat rotation, some with mechanisation, some manually	Northwestern thorn scrub forests	Deserts and xeric shrublands	U
97.b	2003-2016	India	32 villages in Haryana state	R	29.059	76.085	Rural farmers, most following a rice-wheat rotation, some with mechanisation, some manually	Northwestern thorn scrub forests	Deserts and xeric shrublands	U
98.a	2009	India	Dhanori, Ajnauda Kalan and Simro villages in Patiala district, Punjab state	V23	30.31	76.317	Rural farmers, many growing monoculture of rice-wheat in rotation	Northwestern thorn scrub forests	Deserts and xeric shrublands	There are a number of Acts in India for the prevention, control and abatement of air pollution (Air Act 1981 and Environment Act 1986), and the Punjab Government has policies to address agricultural polllution, including air pollution from crop residue burning. During 2005–2006, the Punjab government created an ‘Agricultural Research and Development Fund’, among other things for encouraging use o…
99.a	2000-2001	Indonesia	Major peatlands north of Danau Jempang lake in the Middle Mahakam peatlands in the Kutai Lowlands, about 60 km inland from Samarinda, East Kalimantan, Borneo	R	-0.385	116.189	Mostly Kutai and Banjar people living in villages situated along the major rivers. The predominant economic activity in the area is fishing, for local consumption and sale. Harvesting of snakes and lizards for their skins and tortoises for export as food is also an ongoing practice. People use nearby peatlands and lakes on an open-access basis for harvesting fish, reptiles, sedges, timber, and fu…	Borneo peat swamp forests; Southwest Borneo freshwater swamp forests; Sundaland heath forests	Tropical and subtropical moist broadleaf forests	U
100.a	1997	Tanzania	Villages of Lubungo, Maseyu and Gwata in Kitulanghalo Forest Reserve and surrounding public lands between (6 deg 34'S-6deg45'S and 37deg53'E-38deg04'E)	V23	-6.675	37.983	Swidden agriculture, which is undertaken in the majority of the areas cleared for charcoal, is practiced by 68% of the population while permanent cropping is practiced by 32% of the population. Both farming systems predominantly comprise mono-cropping and mixed-cropping of cereals with bean crops. Villagers do not keep livestock due to the presence of tsetse flies. Apart from using miombo woodlan…	Eastern Miombo woodlands	Tropical and subtropical grasslands, savannas, and shrublands	U
101.a	2006-2007	Tanzania	Villages of Kombola, Kwadoli, Ubiri, Mafuta, Mhonda, Mwevuge, Mndela, Mbogo, Mkindo and Kisimagullu in the Nguru Mountains (5 deg06'51.20''S, 37 deg 26'03.16''E),	R	-5.114	37.434	People practising swidden agriculture of maize, bean, groundnut, cardamom, yam, plantain, cassava, sorghum, millet and other crops. Where tilling is applied it is non-mechanised, and restricted to the hand hoe.	Eastern Miombo woodlands; Eastern arc forests	Tropical and subtropical grasslands, savannas, and shrublands; Tropical and subtropical moist broadleaf forests	U
102.a	2001-2006	Tanzania	Mfuto village, Myunga Ward, Ndalambo Division, Mbozi District	V1	-8.844	32.276	Nyamwanga people. Traditional swidden agriculture in the area has finger millet as the staple crop, but today the staple foods are maize and cassava. Maize monoculture is 'sweeping' through the region due to a spike in the maize price from 2002 enabling farmers to invest in oxen-driven ploughing, to produce maize for sale. Oxen driven ploughing on permanent plots, and an 'etumba system' involving…	Central Zambezian Miombo woodlands	Tropical and subtropical grasslands, savannas, and shrublands	In the late 1970s the government prohibited slash-and-burn cultivation in primary woodlands, forcing farmers to change or improve their cultivation systems. Maize was introduced to the area after 'villigisation' policies in 1974 mandated fixed settlement in permanent villages. The shift toward more intensive land use was enhanced by the National Maize Project that began in 1974–75 and included th…
103.a	1990, 1997, 2010	Tanzania	Ulumi and Mashete villages, Sumbawanga	V23	-7.953	31.464	In Ulumi, Mambwe (dominant), Fipa and Nyika people. In Mashete Bemba, Mambwe, Namwanga, Chewe and Nyika peoples. Traditional swidden agriculture is known as Ntemele, and is based on a rotation of the traditional crops of finger millet, beans, and cassava. In the latter twentieth century there was a transition from extensive, long fallow swidden, to more intensive short-fallow or permanent cultiva…	Central Zambezian Miombo woodlands	Tropical and subtropical grasslands, savannas, and shrublands	Villigisation and centralised government policies from 1974-75 dramtically reduced shifting cultivation in favour of semipermanent maize cultivation- fertiliser and other inputs were subsidised by the state. Structural adjustment policies in the late 1980s and 1990s removed subsidies from small famers. This, with declining maize prices has resulted in farmers withdrawing from the market and retur…
103.b	2010	Zambia	Bwacha and Ngoma villages	V23	-10.229	31.194	In Bwacha, Bemba, Mambwe, Namwanga, Chewe and Nyika peoples. Bwacha is 20km from the main market town of Kasama. Its close proximity to the road and the associated access to the Kasama market have made it a desirable location for migrating families to settle. Ngoma is a remote village of Bemba people, accessible only by an unmaintained dirt road. Traditional swidden agriculture is known as Chitem…	Central Zambezian Miombo woodlands	Tropical and subtropical grasslands, savannas, and shrublands	From the 1970s-1990s govt. policy focused on increasing maize production. Among the many incentives for maize production were subsidized inputs in the form of fertilizer and High Yielding Variety (HYV) seeds and the collection of harvest through the Northern Co-operative Union. Structural adjustment policies in the late 1980s and 1990s, and a change of govt. removed subsidies from small famers. T…
104.a	2003-2004	Madagascar	Andasibe, Brickaville and Toamasina villages	V23	-18.565	48.868	Besimisaraka people. All farmers interviewed practiced both tavy (swidden agriculture combining rice and cassava) and permanent rice monoculture (tanimbary). Tavy was focused on hillsides and hilltops, whilst permament farming was conducted in valleys and by rivers.	Madagascar lowland forests	Tropical and subtropical moist broadleaf forests	The Government seeks to implement agricultural and development policies that promote biodiversity conservation and higher crop yields through a switch from tavy to tanimbary (irrigated agriculture). The Ministry of Agriculture instructs rural farmers on innovative farming techniques to improve their yields. The Ministry of Scientific Research has the goal of providing hybrid and GMO seeds for the…
105.a	1993-1997	Brazil	Pedro Peixoto, Acre state	V1	-10.548	-68.038	Study focuses on smallholder farmers in government pioneer farming settlements, with higher agricultural land covers than typical for the region. This settlement has lower levels of forest clearance than Theobroma, and better soils. For swidden agriculture rice, corn, beans and manioc are grown, usually without chemical inputs. Livestock- dairy and beef focused are important in the area. Some hou…	Madeira-Tapajós moist forests	Tropical and subtropical moist broadleaf forests	In the 1960s the Brazilian government initiated 'Operation Amazon', creating agencies devoted to regional development, often via subsidized credit to ranching and mining interests, and began infrastructure development to link the Amazon region to the rest of Brazil. In the 1970s, small-scale farmers, including those displaced by infrastructure projects were given sizable tracts of land (up to 100…
105.b	1993-1997	Brazil	Theobroma, Rondonia state	V1	-10.531	-62.314	Study focuses on smallholder farmers in government pioneer farming settlements, with higher agricultural land covers than typical for the region. This settlement has higher levels of forest clearance than Pedro Peixoto, and poorer soils. For swidden agriculture rice, corn, beans and manioc are grown, usually without chemical inputs. Livestock- dairy and beef focused are important in the area. Som…	Iquitos varzeá; Southwest Amazon moist forests	Tropical and subtropical moist broadleaf forests	In the 1960s the Brazilian government initiated 'Operation Amazon', creating agencies devoted to regional development, often via subsidized credit to ranching and mining interests, and began infrastructure development to link the Amazon region to the rest of Brazil. In the 1970s, small-scale farmers, including those displaced by infrastructure projects were given sizable tracts of land (up to 100…
106.a	1990-2001	Ecuador	Sarayaku community, Pastaza province	V1	-1.733	-77.483	Kichwa people living in 5 hamlets, practising swidden agriculture, hunting and gathering. The settlement has limited transport connections. Agriculture is only loosely connected to the market economy, and agriculture is almost exclusively subsistence oriented. The most important crops are sweet cassava, plantain and maize. Cattle pastures were established in the 1980s due to government subsidies,…	Napo moist forests	Tropical and subtropical moist broadleaf forests	U
107.a	2004	Laos	4 Sites near villages of Houay Khot, Nok Pit and Ban Lak Sip, Luang Prabang	V45	19.8	102.167	The majority of farmers in the study area are Khamou, traditional shifting cultivators who use the 250–1000 m elevation belt and the 20–55% slope range for cultivation. Upland rice is a key crop	Luang Prabang montane rain forests	Tropical and subtropical moist broadleaf forests	Increased pressure on arable land is a result of government policies to resetttle populations near roads, and of land allocation
108.a	1991-1993	Laos	Districts of Hune, Beng and Xay of Oudomxay province. Viengkham, Noi, Pakseng and Xiengngeun Districts of Luang Prabang Province	R	20.226	102.201	Al large number of different ethnic groups. These provinces have the highest proportion of upland rice cultivation in Laos. Swidden is the main production system used in the upland environment, and rice is the main upland crop. Upland rice is almost always grown in swidden systems, whereas other crops may be grown as intercrops with rice or in semi-permanent systems. Fallow land is used for grazi…	Northern Indochina subtropical forests; Luang Prabang montane rain forests	Tropical and subtropical moist broadleaf forests	Present government policies give high priority to reducing the area under swidden agriculture. Options explored by researchers and technologies recommended to Lao swidden farmers include alley cropping, rotation systems, and planting of perennials.
109.a	2003	Laos	Villages of Huayman and Thapho in Phonsay district, Luang Prabang province, villages of Namo Neau and Pangdou Tai in Namo district, Oudomxay province and villages of Hatxoua, Houayleaung, Houaythum, Latthahae and Pakchaek in Pak Ou district, Luang Prabang province	R	20.439	102.391	Lao Leu and Khamu people. Most farmers in these districts are upland rice swidden farmers and some are also montane paddy rice farmers. These are all villages in which no large irrigation schemes have been developed for paddy production. The Lao Leu had a higher percentage of households with paddy (44% vs 33%) and more paddy area (0.57 vs 0.46 ha) than the Khamu. These differences can largely be …	Northern Indochina subtropical forests; Luang Prabang montane rain forests	Tropical and subtropical moist broadleaf forests	In the early to mid 1990s, a government land allocation policy was enacted to protect forests. This limited the area where farmers could grow their upland crops. In most cases, farmers were allocated 3 to 4 upland fields. Using their traditional system of rotation this only makes it possible for them to have a 2- to 3-year fallow period. The Government has iniatives to promote montane paddy rice-…
110.a	2000	Laos	Villages of Thin Laeo, Phon Xai and Long Louat in Xiang Ngeun district, Luang Phabang province	V23	19.76	102.183	Mostly Lao Thung people. 70-80 percent of households grow upland rice in swidden system. Many households grow only upland rice in a swidden system, some farmers combine swidden and paddy-grown rice, and a handful grow only paddy rice	Luang Prabang montane rain forests	Tropical and subtropical moist broadleaf forests	U
111.a	2001	Laos	Settlements of Cheang Neua, Cheang Kang, Phonsana, Pal Bout, Houay Si, Houay Lo Toung Houay Lo Sung, Om Mok, Matsa, Pak Luang, Nyot Si and Khong Mone in Pak Luang sub-district of Goi District, Luang Prabang province	R	20.94	102.759	Lao or Lao Lum (lowlander), Khmu or Lao Thoeng (midlander) and Hmong or Lao Sung (highlander) people. 91 percent of households are engaged in agricultural activities such as subsistence rice farming, cash crop cultivation and livestock rearing. Upland rice and corn are grown in swidden fields, and opium poppy is grown in small-scale reclaimed fields. There are no paddy fields in the area. Other c…	Northern Indochina subtropical forests	Tropical and subtropical moist broadleaf forests	The Land Law in 1996 meant lands were allocated to each family, where land came with a transferrable/ sellable land title, while still belonging to the state. Under the law only 1 ha can be allocated for rice, making swidden impractical. But the Land Allocation Programme had not yet progressed into this mountainous area at the time of the study. Following the passage of the Forest Law in 1996, La…
112.a	1999	Laos	Villages of Pieng Xai, Keo Xik, Khang Khao in Huamuang District of Huaphan Province	V23	20.12	103.84	Khamu and Hmong people. Most swidden agriculture in Laos is concentrated in northern Laos. Generally tillage and chemical inputs are not used. Swidden grown upland rice is the most important crop (grown for subsistence), but households also depend on a diverse range of land use and off-farm activities including fruit gardens, animal husbandry, collection of non-timber forest products and wage lab…	Northern Indochina subtropical forests	Tropical and subtropical moist broadleaf forests	According to the Ministry of Agriculture and Forestry (MAF) the main causes of deforestation are logging, both sanctioned and illegal, and shifting cultivation. Government policies and rhetoric often contrast with authors who argue that to conserve forested ecosystems and their environmental functions, shifting cultivation is preferable to the permanent cropping systems proposed. Recently formali…
113.a	U	Brazil	Communities of Tijuco Preto, Terra Cortada and Jacaiba, Prudentópolis municipality, Paraná state in the southern part of Brazil (25°12'47'' S, 50°58'40'' W)	V23	-25.213	-50.978	Predominantly European migrants of Ukrainian descent who arrived in the region during the end of the nineteenth century and the early twentieth century. Agriculture is the most important economic activity in the Prudentópolis municipality, and more than half of the population lives in the countryside, resulting in diverse rural landscapes. The varied agricultural landscapes include commercial agr…	Araucaria moist forests	Tropical and subtropical moist broadleaf forests	U
114.a	U	Zimbabwe	U	U	U	U	Rural peoples	U	U	Fire management in Zimbabwe was first instituted with the arrival of white settlers. The Natural Resources Board was formed to implement fire prevention policies in the commercial and communal farming areas, and protected forests and nature reserves. At farm level, farmers were responsible for establishing fire guards before the start of the dry season, which coincides with the fire season. The c…	The methodology section says the paper include information from field observations and informal interviews, but does not indicate where these took place within the country
115.a	2010-2012	Zimbabwe	Chiota smallholder farming area, Marondera district	R	-18.31	31.504	Smallholder farmers cultivating dambos (seasonally saturated wetlands). Maize, rice and other crops are grown in dambos.	Southern Miombo woodlands	Tropical and subtropical grasslands, savannas, and shrublands	Dambo cultivation was prohibited in colonial period due to soil erosion associated with their use. After independence, policing of the legislation relaxed
116.a	2009	Cambodia	Ta Kream and Poy Svay villages, Kamping Puoy Irrigation Rehabilitation Area west of Battambang city in Battambang province of northwestern Cambodia (13dego2'N, 103deg04'E)	V23	13.033	103.067	Paddy rice farmers. Relatively few farmers in Cambodia have adopted modern agricultural techniques (e.g. fertilisers, irrigation) compared with Thailand and Vietnam. The study area is an irrigated paddy area where most farmers use herbicides, but at a low application rate.	Central Indochina dry forests	Tropical and subtropical dry broadleaf forests	The Cambodian government recently issued a national policy to increase the dry-season irrigated rice area from 385,000 in 2010 to 480,000 ha in 2015
117.a	2007, 2008, 2011	China	Villages of Heye, Shuzheng, Zhechawa, Jianpan, Panya and Rexi in the Jiuzhaihou National Park	R	33.26	103.919	Residents of the national park. Since 1999, land use has been characterised by implementation of forestation programs. From 1979 to 1999 family-based agriculture dominated, and during Maoist socialism 1950s-1970s, there was collective agriculture with intensive logging and resource extraction.	Southeast Tibet shrublands and meadows; Qionglai-Minshan conifer forests	Montane grasslands and shrublands; Temperate coniferous forests	From 1950s-1970s maoist collectivisation households were concentrated in villages close to roads and near the valley bottoms, and family-based farming was prohibited. Since 1992, management of the Park has progressively transferred local residents from employment in agriculture and animal husbandry to tourism and environmental conservation. Beginning in 1996 a 5 year plan was implemented to reduc…
118.a	2009-2011	Ecuador	Community of Zuleta in the north of Ecuador (0°22’-0°23’ N, 78°06’ W).	V1	0.375	-78.1	Rural peasants living in paramos. Cattle and sheep grazing is the most common paramo land use and most important local livelihood.	Northern Andean páramo	Montane grasslands and shrublands	Over the past decade a number of PES programs directed at protecting páramo grasslands have emerged in Ecuador, which compensate landowners to plant pine or regionally native species, and alter traditional burning and grazing regimes. SocioPáramo, launched in 2009, as part of the wider SocioBosque programme established by the Ministry of the Environment, is one of these programs. SocioPáramo prom…
119.a	2009, 2010	Indonesia	Part of Blocks A-NW and E of the Ex-Mega Rice Project (MRP) area, Central Kalimantan, Borneo	R	-2.234	114.473	Dayak Ngaju communities. Rubber tapping, fishing and non-irrigated paddy rice are the main sources of livelihood. Prior to the Mega Rice Project, the farmers in Blocks A-NW and E practiced swidden agriculture, similar to other Dayak communities	Southwest Borneo freshwater swamp forests	Tropical and subtropical moist broadleaf forests	The Mega Rice Project (MRP) was created in 1995 by the Suharto government, to clear approximately 1 million ha of peat swamp forest for rice growing, with 187 km of drainage canals constructed. This removed the land-use rights of local communities and resulted in huge peat fires in 1997. After the collapse of the Suharto regime in 1998, the new government terminated the MRP in 1999. A rapid gover…
120.a	2012	Kenya	3 villages on eastern side of Chyulu Hills National Park and surrounding lands, Kibwezi, Makueni County	V23	-2.697	37.568	Kamba people, who practice agropastoral livelihoods, growing maize, sorghum, millet, beans and pigeon peas and rearing livestock. Woody plant resources are critical to the Kamba who extract them commercially for charcoal and wood carving activities. Also, the leaves of Cathaedulis (miraa, khat), which grows naturally in the Chyulu highlands,are collected illegally from the park and sold as a stim…	Northern Acacia-Commiphora bushlands and thickets; Eastern Arc forests	Tropical and subtropical grasslands, savannas, and shrublands; Tropical and subtropical moist broadleaf forests	In 1983, the Kenya government gazetted the eastern flank of the hills to form Chyulu Hills National Park, and residents were forcefully resettled. There is an official fire suppression policy
120.b	2012	Kenya	3 villages on western side of Chyulu Hills National Park and surrounding lands, Loitokitok, Kajiado County	V23	-2.697	37.568	Maasai people, who are predominantly pastoralists, settled in group ranches. Some Maasai diversify their income sources by farming in wetland areasand supporting tourist facilities in group ranches.	Northern Acacia-Commiphora bushlands and thickets; Eastern Arc forests	Tropical and subtropical grasslands, savannas, and shrublands; Tropical and subtropical moist broadleaf forests	There is an official fire suppression policy
121.a	2008-2012	France	A village territory (commune) in the headwaters of the Saison River in the upper Soule Valley, Basque portion of French Western Pyrenees	V1	42.996	-0.988	Pastoralists, of Basque ethno-liguistic identity. Farming has transitioned from a diverse mixed agro-pastoralism focused on subsistence, to commercial veal and sheep-based dairy production heavily dependent on government subsidies	Pyrenees conifer and mixed forests	Temperate broadleaf and mixed forests	Prohibitions of fire-use in and around managed forests began as early as the 1660s, However, in the Western Pyrenees, the local population largely ignored forest regulations until the French Revolution and the establishment of the modern republic. The Code Forestier of 1827 updated the forest laws and provided a renewed administrative context for enforcement. The Code Forestier placed communal fo…
122.a	U	Nepal	Kharibot Village Development Committee, western Gorkha	V1	28.23	84.658	Subsistence farmers, practising sedentary agriculture and transhumance pastoralism. Settlements and crop fields are generally located at lower altitude in the study area around 1300 to 1800 masl, while mosaics of forests and grasslands and herders’ sheds, goths, are located at higher altitude. The migratory pastoralism practised in the Himalayas is a cyclic process of vertical movement between go…	Eastern Himalayan subalpine conifer forests	Temperate coniferous forests	The Government does not recognise shrub encroachment as a management challenge for the pastoral landscape- its recent Rangeland Policy of Nepal (2012) deems 'over-stocking', 'excessive use of resources' and 'mismangement' as the main rangeland problems
123.a	2008-2011	Romania	Village of Gyimesközéplok, Valley of the Hildegseg stream (46deg36'N, 25 deg57'E), Gyimes, Eastern Carpathians	V1	46.6	25.95	Csángó people, semi-subsistence farmers. The local traditional farming is based on animal husbandry (mainly cattle farming) producing beef and dairy products, primarily cheese. Sheep farming is less important. Cultivation of potato, supplemented with the production of garden vegetables is also significant. Medicinal and wild foods are collected on holidays. Meadows are managed traditionally by 15…	Carpathian montane forests	Temperate coniferous forests	Land abandonment is fostered by some agri-environmental subsidy schemes, their extreme bureaucracy and the strict regulations on dairy production implemented by the European Union. The farming system of Csángós, particularly the use of mountainhuts, does not make possible the fulfillment of the overly strict EU regulations (e.g. regarding maximum germ count 100,000/ml milk,somatic cell count 400,…
124.a	2009-2010	Peru	Villages around city of Lamas, Province of San Martin	R	-6.424	-76.508	Kechwa-Lamista farmers. Most farmers in San Martin are smallholders: over 50 % have access to fewer than 10 ha and use swidden farming systems that include mosaics of forestry, agroforestry, as well as annual and perennial crop production, mostly without using any pesticides or mineral fertilizers. Maize is traditionally associated and intercropped with several kinds of beans and sometimes cotton…	Peruvian Yungas; Ucayali moist forests	Tropical and subtropical moist broadleaf forests	U
125.a	U	Algeria	Wilaya (Province) of Tizi Ouzou	R	36.707	4.233	Agro-slyvo-pastoralists	Mediterranean woodlands and forests	Mediterranean forests, woodlands, and shrub	Garbage dumping and burning is illegal
125.b	U	Algeria	Wilaya (Province) of Bouira	R	36.289	3.825	Agro-slyvo-pastoralists	Mediterranean woodlands and forests; Mediterranean conifer and mixed forests	Mediterranean forests, woodlands, and shrub; Temperate coniferous forests	Garbage dumping and burning is illegal
125.c	U	Algeria	Wilaya (Province) of Boumerdes	R	36.684	3.622	Agro-slyvo-pastoralists	Mediterranean woodlands and forests	Mediterranean forests, woodlands, and shrub	Garbage dumping and burning is illegal
126.a	2010	Brazil	Communities of Sao Bento and Sao Lorenzo, on the River Arapiuns, State of Para	V23	-2.635	-55.589	Caboclos (riberinhos), non-indigenous inhabitants of the Brazilian Amazon-heterogeneous historical peasantries with indigenous and European forefathers and northeasterners of African origin. They draw heavily on indigenous modes of existence, living by swidden agriculture, fishing and forest extraction, and increasingly state-sourced benefits and salaries. Agricultural production meets subsistenc…	Madeira-Tapajós moist forests	Tropical and subtropical moist broadleaf forests	Sao Bento is part of an agroextractive settlement project implemented by Brazil's land reform agency, and Sao Lorenzo is part of an extractive reserve under the Brazilian Inst. of Environment and Renewable Natural Resources. The Forest Code of 1934 was the first legislation to regulate burning. Today, federal rules regarding fire use are under Forest Code 4.771 (1965), Decreto No. 2.661 (1998), P…
127.a	2004-2005	India	Hongphoy village, Mon district, Nagaland	V1	26.774	94.994	Naga people, practising Jhum cultivation (swidden) mainly of upland rice but sometimes pearl millet, maize. Secondary crops include yam, cassava, cucumber, ginger, chilli etc. This is mainly for subsistence.	Mizoram-Manipur-Kachin rain forests	Tropical and subtropical moist broadleaf forests	U
127.b	2004-2006	India	Minyakshu village, Mon district, Nagaland	V1	26.441	95.032	Naga people, practising Jhum cultivation (swidden) mainly of pearl millet and maize but sometimes upland rice. Secondary crops include yam, cassava, cucumber, ginger, chilli etc. This is mainly for subsistence.	Northeast India-Myanmar pine forests	Tropical and subtropical coniferous forests	U
128.a	2001-2002	Brazil	Indigenous lands of Areões and Pimentel Barbosa in Mato Grosso State	R	-13.844	-51.865	Xavante people	Cerrado	Tropical and subtropical grasslands, savannas, and shrublands	U
129.a	1986-2012	USA	California, Central and Southern Sierra Nevada	R	38.342	-120.286	Sierra Nevada tribes incl. North Fork Mono, Mono, Sierra Miwuk/Miwok/Me-Wuk	Sierra Nevada forests	Temperate coniferous forests	U
129.b	1986-2012	USA	Northern California. Klamath-Siskiyou Mountains and outer Coast Ranges	R	41.706	-123.748	Karuk, Yurok, Hupa and other tribes	Klamath-Siskiyou forests	Temperate coniferous forests	U
130.a	2003-2010	Mexico	Villages of La Lucha, Centauro del Norte, Ricardo Payro Gene, Cana Brava and Arroyo Negro, on the southeastern boundaries of the Calakmul Biosphere Reserve, Municipality of Calakmul, Campeche State	V45	18.032	-89.4	These ejidos had a chicle and timber-based economy before the 1980s, when land rights were formally recognised and the economy transitioned to a farming economy. 91 percent of farmers practise traditional milpa (swidden agriculture of maize intercropped with squash, beans, cowpea) or a form of milpa agriculture where maize is monocropped. Many farmers also plant permanent crops (chilli- 79% of ho…	Yucatán moist forests	Tropical and subtropical moist broadleaf forests	Ejido land rights were recognised in the 1980s, enabling local people to transition to a consolidated farming economy. Liberalisation of the agricultural sector in Mexico in the 1980s saw withdrawal of agricultural subsidies in the 1980s, and drastic reduction in import tariffs, making smallholder swidden agriculture less viable. In the mid 1990s new subsidy programmes (PROCAMPO and Alianza para …
131.a	2019	India	Panipat District, Haryana State	R	29.359	76.937	Farmers practising dual cropping system, of Kharif (summer crop) and Rabi (winter crop) Mostly the same land is used for growing rice paddy (the Kharif crop) and wheat (the Rabi crop) alternately within the same year.	Northwestern thorn scrub forests	Deserts and xeric shrublands	Penalties for crop residue burning were introduced in 2016 under the Air Prevention and Control of Pollution Act 1981. There are three landholding classifications with different penalty schemes (penalties for landholdings measuring 0.80 ha, 0.80–0.20 ha, and beyond 2.02 ha are INR 2,500, INR 5,000, and INR 15,000, respectively). The penalties are kept considerably low due to the weak financial st…
132.a	2003, 2006, 2007, 2010	Brazil	10 Quilombola communities: Maria Rosa, Piloes, Galvao, Sao Pedro, Ivaporunduva, Pedro Cubas, Pedro Cubas de Cima, Sapatu, Andre Lopes and Nhunguara in the municipalities of Eldorado and Iporanga in the Ribeira valley, Sao Paulo State	R	-24.554	-48.381	Quilombola people (descendants of former Maroon colonies, among the poorest and most marginalized rural communities in Brazil), traditionally practising swidden agriculture. Some households still produce subsistence crops in swidden plots, but only in limited areas (less than 0.2 ha) that are usually closer to their homes. Most of the agricultural area is now used for cash crops such as bananas, …	Serra do Mar coastal forests	Tropical and subtropical moist broadleaf forests	The Quilombola communities' land rights were recognised in 2000, and 3524 communities have since been recognised by the Government. There are also several protected areas in the Ribeira Valley. From 1965 until May 2012, the Forest Code stated that 20 % of any rural property in the Atlantic forest biome should be left intact as a legal reserve. Moreover, the vegetation covering the margins of rive…
133.a	2007-2009	Canada	Peavine Métis settlement	V1	55.863	-116.262	Métis people, many of whom work in corporations owned by the settlement, or in private industry.	Mid-Continental Canadian forests	Boreal forests/taiga	In Alberta, traditional burning was officially banned in 1910 by the government in order to protect timber, watersheds, and communities. This reduced the use of traditional burning, which was then considered illegal. By the end of World War I, burning was restricted to the most remote and isolated areas of the province. Records from 1942 are the first to document fines ($25.00) and jail sentences…
134.a	2008-2011	Honduras	Community within Honduran pine-oak forests- location is kept confidential	V1	U	U	Farmers and community forestry cooperative members	Central American pine-oak forests	Tropical and subtropical coniferous forests	In 2004, community forestry was implemented with technical support of an international governmental development organization in east-central Honduras. The project organized local communities into a forestry cooperative that co-manages national forest lands with administrative support from the state authority and technical support from the development organization.
135.a	2010	Ghana	10 communities adjacent to the forest reserves of Pamu-Berekum and Mpamasu in the Dormaa forest district; South and North Fomanso, Dome River and Preku in the Juaso forest district; and Southern Scarp and Worobong South in the Begoro forest district	R	6.55	-1.125	This paper focuses on use and management of forest areas outside Forest Reserves. Most people have farming as their main occupation	Eastern Guinean forests	Tropical and subtropical moist broadleaf forests	After devastating fires in 1982/1983, Ghana adopted a number of policies and legal instruments concerning bushfire management. The current law regulating bushfires is the 1990 Control and Prevention Bushfire Act. This law decentralised the regulation of bushfires to district level. Thus, there is a fire sub-committee under each District Assembly, which enacts by-laws (set of rules and measures) t…
136.a	2008	Madagascar	Villages of Tsimbahambo and Laditra in the Tolongoina commune	V23	-21.551	47.504	Tanala people living in hillside areas. Households allocate a signifiantly larger proportion of land holdings to practising tavy swidden agriculture of rice and cassava in hillside than in lowland areas of the villages. Some area is allocated to permanent cropping (tanimboly) of paddy rice or coffee/fruit tree agroforestry	Madagascar lowland forests	Tropical and subtropical moist broadleaf forests	In response to environmental concerns there have been stricter forest protection laws in recent decades to limit tavy agriculture. There have been attempts to encourage agricultural intensification and diversification, especially in the irrigated lowlands, towards permanent lowland rice cultivation with double cropping.There is a farmers cooperative in the commune, which cooperates with aid proje…
137.a	2006-2007	Solomon Islands	Bellona Island	R	-11.298	159.792	The farming system is based on swidden agriculture where staple crops such as yams, taro and sweet potato are grown after variable fallow lengths. The island also relies on food imports and remittances from non-resident Bellonese.	Solomon Islands rain forests	Tropical and subtropical moist broadleaf forests	U
138.a	2001-2006	Laos	Ban Lak Sip village, Luang Prabang Province	V1	19.848	102.167	Kh'mu people (83% of village population). Ban Lak Sip residents are involved in a variety of on-farm livelihood activities, though annual cropping— mainly upland rice for subsistence and Job’s tear (Coix lachrymal-jobi), a gramineae exported for the Thai pharmaceutical industry—constitutes the single most-important livelihood activity for virtually all village households. In addition to annual cr…	Northern Thailand-Laos moist deciduous forests	Tropical and subtropical moist broadleaf forests	Promotion of market-oriented production by governmental agencies and the development of exchange and communication infrastructures have combined to increase the market integration of Laos’ rural areas. The New Economic Mechanism (1986) emphasised that one stage of the transition from subsistence to market economy is the abandonment of shifting cultivation practices in exchange for stable and mark…	Particularities—resettlements from neighbouring villages, homogeneous ethnic distribution, proximity to a major road and an average-sized urban centre—combine to make of Ban Lak Sip a relatively atypical case when viewed against Laos as a whole. Yet, the actual livelihood systems of its residents are clearly characteristic of most of Laos’ upland populations.
139.a	2005-2006	Indonesia	Villages of Tanjung Kasri and Renah Kemumu, Northeastern area of Jangkat Sub-District, Merangin District, Kerinci Seblat National Park, Sumatra	V23	-2.443	101.65	Serampa people, whose ancestral territory now lies within the National Park, practising umo rice swidden agriculture, which has evolved over the past 40 years to include the cultivation of cinnamon, with various combinations of crops (ladang kulit). There are also permanent rice paddy fields in the valley wetlands	Sumatran montane rain forests	Tropical and subtropical moist broadleaf forests	U
140.a	U	Malaysia	Villages of Meranek, Empila, Melayu, Sungai Mata, Many and Nakong/Naie in Samarahan, Sarawak State, Borneo	R	1.431	110.439	Farmers traditionally practise subsistence agriculture, but have started to plant pineapple as a cash crop on peat soils.	Borneo peat swamp forests; Borneo lowland rain forests	Tropical and subtropical moist broadleaf forests	As an ASEAN state, Malaysia has signed the ASEAN Agreement on Haze in 2002, to reduce haze from fires. Open burning was banned in Malaysia in 1999, but the policy mainly targets large scale oil palm plantations as they are the main cause of haze. The Integrated Agriculture Development Area Samarahan targeted pineapple cultivation as its main project, so farmers unde the scheme have been encourage…
141.a	2005-2006	Madagascar	Villages of Ampataka, Kirindy, Marofandila, Tandila and Ankoraobato, Central Menabe	V45	-20.107	44.582	Farmers, most growing only rainfed crops. This is either hatsake swidden agriculture to produce maize, or monka - land cleared through hatsake and left fallow for 3 years. The relatively nutrient poor soils of monka mean that groundnut and manioc are grown on these plots.	Madagascar succulent woodlands	Deserts and xeric shrublands	Before French colonisation, the region's economy was shaped largely by pastoralism, and swidden agriculture was largely practiced by slaves. The French colonial government introduced various policies affecting agriculture, including a policy of minimum cultivation per village, introduction of private land tenure and land registration to replace customary tenure and awarding large concession to fo…	Author notes that tavy refers to forest clearance with fire to produce rain-fed rice, not practised in this area
142.a	U	Ethiopia	Settlements of Mako, Maganto and Dargus, Lower Omo Valley, including the Omo and Mago National Parks	V23	5.838	36.223	Mursi agropastoralists, who have lived in the area since the early 19th century and who use areas in and around the National Parks. The Mursi are pastoralist in their cultural values and historical traditions but do not have sufficient cattle to live wholly or even mainly on a pastoral diet. The key subsistence activities are flood retreat cultivation, swidden agriculture and cattle and small sto…	Somali Acacia-Commiphora bushlands and thickets	Tropical and subtropical grasslands, savannas, and shrublands	The National Parks were established in the 1960s and 1970s and contain most of the valuable flood retreat agricultural land and most of their best dry season grazing areas. Although their access to these areas has not yet been significantly restricted in practice, the wildlife authorities consider that the area occupied by the Mursi is becoming degraded to bushland because of human population gro…
143.a	U	Mexico	Ignacio Allende, Venustiano Carranza and Cuctiepa ejidos in the Municipality of Tumbala, State of Chiapas (17deg16' N, 92deg09'W)	V23	17.267	-92.15	Indigenous people practising milpa agriculture. The first crop (milpa), extends from April to September and the second crop (tornamil), from November to April. It is the milpa crop that takes place in longer-fallowed forest, and the tornamil crop is semi-permanent, or permanent, and fire is not used to clear the land	Chiapas montane forests; Petén-Veracruz moist forests	Tropical and subtropical moist broadleaf forests	U
144.a	2006-2008	Canada	Pikangikum First Nation, Whitefeather Forest, Ontario	V1	51.813	-93.97	Pikangikum First Nation, an Anishinaabe (Ojibwa) community. Traditional subsistance activities including fishing, trapping furbearers and hunting waterfowl and moose continue to contribute to many family economies	Midwestern Canadian Shield forests	Boreal forests/taiga	Historically, fire management policy in Canada has been developed by the provinces. It is committed to controlling threats to life, property, and merchantable timber resources posed by fire through a policy of aggressive fire suppression. By the 1920s, aircraft were being used in the region to detect and suppress Indigenous burning. Elders report that they began to be afraid of using fire by the …
145.a	U	Australia	Wetlands within Kakadu National Park, Arnhem land, Northern Territory	R	-13.051	132.391	Aboriginal people	Arnhem Land tropical savanna	Tropical and subtropical grasslands, savannas, and shrublands	U
146.a	U	Italy	Managed Nature Reserve of Vauda	R	45.262	7.68	Cattle farmers	Alps conifer and mixed forests; Po Basin mixed forests	Temperate coniferous forests; Temperate broadleaf and mixed forests	Calluna heathlands are a priority habitat under the EU Habitats Directive but have largely been lost, so remaining fragments have been designated as 'Managed Nature Reserves'
147.a	U	Italy	Comunità Montana Vallo di Diano (consisting of 15 municipalities, inside the National Park of Cilento and Vallo di Diano, in the province of Salerno, region Campania	R	40.336	15.652	Rural people	Tyrrhenian-Adriatic Sclerophyllous and mixed forests; Italian sclerophyllous and semi-deciduous forests; South Apennine mixed montane forests	Mediterranean forests, woodlands, and shrub	Agricultural fires are legal as long as they comply with regional regulations
147.b	U	Italy	19 municipalities in the National Park of Gargano, in the province of Foggia (region Apulia)	R	41.733	15.767	Rural people	Italian sclerophyllous and semi-deciduous forests	Mediterranean forests, woodlands, and shrub	Agricultural fires are legal as long as they comply with regional regulations
147.c	U	Italy	Province of Bari, in the Apulia region	R	40.956	16.757	Rural people	Tyrrhenian-Adriatic Sclerophyllous and mixed forests; Italian sclerophyllous and semi-deciduous forests	Mediterranean forests, woodlands, and shrub	Agricultural fires are legal as long as they comply with regional regulations
147.d	U	Italy	Basilicata region, including two National Parks: the National Park of Val d’Agri and Lagonegrese and the National Park of Pollino	R	40.267	15.913	Rural people	Italian sclerophyllous and semi-deciduous forests; South Apennine mixed montane forests	Mediterranean forests, woodlands, and shrub	Agricultural fires are legal as long as they comply with regional regulations
148.a	2007-2017	Venezuela	Gran Sabana, Canaima National Park	R	5.235	-61.399	Pemon people (3 sub-groups being the Kamaracotos, Arekuna and Taurepan). Some live in villages, some follow traditional settlement pattern of dispersed nuclear families. Traditional subsistence activities include swidden agriculture, gathering, hunting and fishing.	Guianan savanna	Tropical and subtropical grasslands, savannas, and shrublands	In the past century, the recurrence of large wildfires and damage to vulnerable ecosystems resulted in several administrative and legal actions undertaken by governments in the region, such as the creation of Protected Areas, and the suppression of wildfires—a ‘zero fire’ (or ‘zero burning’) policy—aimed at conserving the diverse and singular landscape. The Environmental Penal Law in Venezuela co…
149.a	1998-2017	Venezuela	Villages of San Francisco de Yeruani, Liwo-Riwo, San Rafael de Kamoiran and Kavanayen, Gran Sabana, Canaima National Park (primary focus on San Francisco de Yeruani).	V45	5.235	-61.399	Pemón people, with a lifestyle based largely on traditional activities- agriculture, fishing, hunting and gathering. Increasingly there is also work in tourism and handicraft production, mining and public administration	Guianan savanna	Tropical and subtropical grasslands, savannas, and shrublands	Canaima National Park was established without prior consultation on territory occupied ancestrally by the Pemon. Although the 1999 National Constitution recognises territorial property rights for indigenous peoples, the Pemon do not have territorial ownership. There is an almost unanimous agreement between scientists and technicians associated with the Park management that the use of fire is caus…
150.a	2000-2004	Venezuela	Monte Bello, Canaima National Park, Bolivar State	V1	4.972	-61.528	Pemón people. Most people in this community practise subsistence agriculture, hunting and fishing, and only a handful participate in wage labour	Guianan savanna	Tropical and subtropical grasslands, savannas, and shrublands	Much of the Gran Sabana falls inside Canaima National Park and is thus nominally under the jurisdiction of the notoriously ineffectual National Park Service (Instituto Nacional de Parques, INPARQUES). In 1991, a little-known land-use plan was approved for the eastern half of the park that fragments the park into conservation zones and limits Pemon subsistence activities to small, ‘special use’ zo…
150.b	2000-2004	Venezuela	Kumarakapy village, Canaima National Park, Bolivar State	V1	5.059	-61.096	Pemón people. People in this community are more likely to be involved in wage labour, including in the tourism industry, but some maintain subsistence livelihoods	Guianan savanna	Tropical and subtropical grasslands, savannas, and shrublands	Much of the Gran Sabana falls inside Canaima National Park and is thus nominally under the jurisdiction of the notoriously ineffectual National Park Service (Instituto Nacional de Parques, INPARQUES). In 1991, a little-known land-use plan was approved for the eastern half of the park that fragments the park into conservation zones and limits Pemon subsistence activities to small, ‘special use’ zo…
151.a	2006	USA	Nez Perce Reservation, Northern Idaho	V1	46.404	-116.803	Nez Perce tribe	Blue Mountains forests; Palouse grasslands	Temperate coniferous forests; Temperate grasslands, savannas, and shrublands	The Nez Perce were historically seasonally migratory, but underwent forced settlement in the 1800s. Today the tribe is a minority landowner within its own reservation, controlling 13% of the approximately 770,000 acrez within the current reservation boundaries. Today burning is regulated in a number of ways. Permission must be obtained from landowners. Federally required burn plans must now be wr…
151.a	2004, 2007-2008	Mozambique	Communities of Madjadjane and Gala, adjacent to the Reserva Especial de Maputo, Matutúine District, Maputo Province	V23	-26.542	32.741	Approximately 90% of residents consider themselves to be Mazingiri Ronga. In order of descending percentages, smaller numbers of people identify themselves as Changaan, Zulu, Matsua, Makua, Portuguese, and Ndau. A combination of swidden agriculture and foraging form the basis of the local economy. Livelihood activities like fishing, goat and cattle herding, mat and charcoal production, beekeeping…	Maputaland coastal forest mosaic	Tropical and subtropical moist broadleaf forests	Article 40 of the Mozambican National Forest and Wildlife Law criminalizes fires that destroy all or part of forests, bush, thicket, or savanna, and requires offenders to serve one year in prison and pay corresponding fines. Limited manpower and transport make it difficult for Matutúine District administration and staff of the Reserva Especial de Maputo to enforce this law. As a result, residents…
152.a	1998-2008	Mexico	Rejogochi valley in the Raramuri lands in the Sierra Tarahumara of the Sierra Madre Occidental mountain range	V1	27.423	-107.479	Raramuri people, Uto-Aztecan-speakers who have lived in the high sierra for at least five centuries. Today most Raramuri communities are economically and ecologically integrated in Mexican and international trade and labor networks. Raramuri communities have diverse histories, dialects, religious practices, and lifestyles; in the highland Sierra, women and men are predominantly subsistence agricu…	Sierra Madre Occidental pine-oak forests	Tropical and subtropical coniferous forests	Clearing and burning swidden plots is officially prohibited as an ecologically destructive practice by local authorities
153.a	1996-1997	Brazil	4 communities in 'Rural Belterra', Santarem-Cuiaba, and Tracua in Belterra municipality, south of Santarem, Para state	V45	-2.926	-54.902	Smallholder farmers practising swidden agriculture, sometimes in combination with small-scale cattle ranching, growing rice, corn, beans and manioc as the most important crops. 'Rural Belterra' is a land “reinvasion” that occurred in the 1990s over abandoned rubber plantation land, Santarem Cuiaba consists of a number of small communities that emerged through federally planned colonisation initia…	Tapajós-Xingu moist forests	Tropical and subtropical moist broadleaf forests	One of the communities was established through federally planned colonisation initiatives in the 1970s.
154.a	1995-2008	Laos	Nakai-Nam Theun National Protected Area	R	17.907	105.313	The 6000 residents of the national park belong to various ethnic groups speaking about 20 languages. Residents typically live in isolated villages, around which they practice various forms of subsistence agriculture, primarily swidden cultivation of glutinous rice, supplemented by fishing and extensive foraging for wild plant and animal foods. Unlike the Hmong in northern Laos who are more nomadi…	Northern Annamites rain forests	Tropical and subtropical moist broadleaf forests	Gazettement of the site as a national protected area (NPA) has had little impact on traditional livelihoods; by Government policy, villagers in NPAs will not be forcibly relocated, and they retain rights to traditional use of local natural resources. Yet the National Protect Area has been the focus of intense management planning for many years including by WCS (Wildlife Conservation Society), the…
155.a	1989-2007	China	11 hamlets in Mengsong, a subwatershed of the Lancang (Mekong River) close to the borders with Myanmar and Laos (locations shown on map in article)	R	22.05	100.586	Hani people (also known as Akha people). The Hani practiced traditional “Qaiya-aneya” (upland rice-rattan, swidden-fallow) agroforestry for about a century to cope with the depletion of wild rattan from the forest. A typical swidden landscape (“taunya” in Hani) had upland rice fields (“qaiya”) and maize fields (“aduya”) as annual crops, intercropping for rattan (“aneya”) and bamboo (“apeya”), and…	Northern Indochina subtropical forests	Tropical and subtropical moist broadleaf forests	The state has promoted several (sometimes conflicting) policies since 1950, such as agricultural policies aimed at increasing agricultural output in the 1960s and 1970s, which drove expansion of swidden, and the 'household responsibility system' introduced in 1978 which allocated land to households and encouraged market production. In 1998, the 'sloping land conversion program' was introduced, wh…
156.a	2005-2006	Tanzania	Engikareti village within the Longido Game Controlled Area in Longido District, Arusha Region (03 deg 00.9' S, 036 deg 42.4')E	V1	-3.008	36.694	Maasai people - semi-nomadic pastoralists. Within the village, residents live in bomas, small communities often composed of extended families and their livestock that range in size from ∼20 to 200 people. In 2005 and 2006, there were ∼80 bomas in the village. Charcoal production also serves as a source of income for a growing number of women	Serengeti volcanic grasslands	Tropical and subtropical grasslands, savannas, and shrublands	During March 2006 the newly elected Kikwete presidential administration issued an immediate ban on the cutting of trees and harvesting of timber. Prior to this period, charcoal production in Engikareti was not technically illegal but severely frowned upon by the elders and punishable by the local village government in the form of a small fine or the slaughter of an animal of the offending party. …
157.a	U	Canada	Gitksan and Wet'suwet'en traditional territories in the inner (eastern) edge of the coast mountains and adjacent plateau areas in Northwestern British Columbia, primarily in the drainage of the Skeena River, and in the northwestern headwaters of the Fraser River system	R	55.257	-127.672	Gitksan and Wet'suwet'en First Nations peoples. Historically these people relied on hunting and gathering key resources such as anadromous salmon, game species (notably woodland caribou, moose, mountain goat, beaver, bear and grouse species), berries, and tree 'cambium' (primarily lodgepole pine and western hemlock) supplemented by other plant foods and inland fish species.	Northern transitional alpine forests; Central British Columbia Mountain forests; Fraser Plateau and Basin complex	Temperate coniferous forests	Berry patch burning was suppressed by the British Colombia forest service in the 1930s and 1940s
158.a	2000-2001	Mexico	Ixtlan, Sierra Juarez of Oaxaca State	V1	17.33	-96.487	Rural peasants, whose agropastoral livelihoods have been replaced by forestry	Sierra Madre de Oaxaca pine-oak forests	Tropical and subtropical coniferous forests	From the first modern forest law in 1926 to recent legislation in 1997, Mexican state policies have declared agropastoral uses of fire as careless and environmentally destructive. The 1930 and 1997 fire control regulations made it neccessary to apply for a permit from the forest service before burning. The author argues that high-level state officials use these policies as 'symbolic capital' just…
159.a	2002-2006	Ghana	Gyamfiase-Adenya-Obom region	R	5.991	-0.216	The primary livelihood is rain-fed cultivation of food crops. Commercial cultivation of cacao and oil palm were important in the colonial period, but since the 1940s the focus has been on staple food crops such as cassava and maize.	Eastern Guinean forests	Tropical and subtropical moist broadleaf forests	U
160.a	U	Australia	West Arnhem Land Fire Abatement Project area, Northern Territory	R	-12.601	133.613	Indigenous rangers employed in the West Arnhem Land Fire Abatement Project	Arnhem Land tropical savanna	Tropical and subtropical grasslands, savannas, and shrublands	Australia belatedly ratified the Kyoto Protocol in 2008, which includes binding national emissions targets, potential to create markets in permits required by emitters, and tradable credits to be treated as offsets for liabilities. In the context of this, and commitments to support Indigenous people to manage their lands, the Australian government has committed AS$10 million to support the develo…	A striking feature of the greenhouse gas emissions profile of the Northern Territory of Australia is an always large but annually variable contribution of savanna burning which reached 49% of total emissions in 2001. In striking contrast with more developed and densely populated regions, fire-related emissions are of the same order as stationary energy and transport combined
161.a	2006	Brazil	15 communties within the Floresta Nacional do Tapajós, Pará state	R	-4.119	-54.908	Most households practice subsistence agriculture, and manioc is the most important staple crop. Some households hunt (24%) or collect non-timber forest products (19%), and virtually all households engage in crop production. Many households also engage in fishing for household consumption	Tapajós-Xingu moist forests	Tropical and subtropical moist broadleaf forests	In 1974, The Floresta Nacional Tapajós (FLONA) became the first state environmental reserve created in the legal Amazon region of Brazil. Settlements were established within the FLONA by the pro-expansion government during this period, persisting today in the form of many of the communities interviewed. Communities in the FLONA are subject to a high level of involvement of the Brazilian environme…	The authors note that the location of their study site within a national forest may distinguish the sample households from Brazilian smallholders in general, as they have been engaged by state agencies in fire prevention agreements and other activities
162.a	2002-2003	Ethiopia	Borana zone of Oromia Regional State in the districts of Arero, Dirre and Yabello (4–4°57.383′N and 36–42°E). Sampling was done across nine Peasant Associations (PAs). Three PAs per district were selected (from Arero the PAs of Halona, Fuldowa, Kafara, from Dirre the PAs of Dubluk, Madhacho and Melbana and from Yabello the PAs of Did-Hara, Daritu, Hara-Wayu)	R	4.5	39	Borana pastoralists keeping cattle, small stock, camels and horses. Crop farming is also increasing inare, and 87% of households practise crop farming, where historically the Borana only kept livestock	U	U	From 1972-74 a framework for developing the Borana rangelands was laid down in an AGROTEC/CRG/SEDES study. The justification for the proposed rangeland development project was that the traditional land use system was destructive to the natural vegetation. The modernizing program was expected to increase the productivity of the Borana herds by instituting proper stocking rates. It was argued that …
163.a	2003; 2004	Peru	Antonio Paimondi village, 20km west of Pucallpa	V1	-8.402	-74.742	Community practising swidden agriculture, growing cassava as the main crop for subsistence and as a cash crop, as well as maize, rice, plantains and beans. Some households also keep livestock. Non-timber forest product collection, fishing and hunting are also important. Farmers do not usually use any chemical inputs	Iquitos varzeá	Tropical and subtropical moist broadleaf forests	U
164.a	U	Tanzania	Hadzaland, bordering Lake Eyasi	R	-3.763	35.146	Hadza people, practising hunter-gatherer livelihoods	Southern Acacia-Commiphora bushlands and thickets	Tropical and subtropical grasslands, savannas, and shrublands	U
164.a	2004	Zambia	Areas of Mapepala, Mepelembe, Chalilo and Phipundu in the Kafinda Game Management Area, bordering the Kasanka National Park, Serenje District, Central Province of Zambia	V45	-12.461	30.243	Extended families live together at individual homesteads (referred to as ‘villages’ by the local community) within walking distance of key facilities like schools or grinding mills. Chitemene swidden agriculture of finger millet is the traditional form of agriculture.	Central Zambezian Miombo woodlands	Tropical and subtropical grasslands, savannas, and shrublands	The nineteenth century colonial governments in the Zambezian region adopted land allocation and division policies that alienated the indigenous population. Fire suppression policies were enacted in the colonial era, and still today, the Forests Act states that igniting bushfires and forest fires is illegal in the late dry season after mid-August. The Kafinda Game Management Area (KGMA) and Kasank…
165.a	U	South Africa	Nqabara Administrative Area, Willowvale district, Mbhashe municipality (28.503587 S, 32.267611 E)	U	-28.504	32.268	Xhosa-speaking people. There are low formal rates of employment in the area and most residents rely on welfare grants, cultivation of crops, and gathering natural resources	Drakensberg montane grasslands, woodlands and forests; Maputaland-Pondoland bushland and thickets	Montane grasslands and shrublands	The former Transkei was an area set up by the former Government of South Africa under the Bantu Self-Government Act of 1959 as a Homeland for the Xhosa Nation. Under the Betterment Programme in South Africa, people were grouped together in tribal communities that would make their governing easier. Therefore, people were forced to relocate from scattered settlements into centralized villages. This…
166.a	2004	Honduras	Municipalies of San Lucas, San Antonio de Flores and Morolica in the Paraiso and Choluteca Departments	R	13.678	-86.925	The main activity in the area is agriculture, and principal crops are maize, beans and maicillo. Cattle ranching is also important (but only for wealthier households). Most farmers produce only for subsistence, with any surplus sold in the community or local markets. Due to the shortage of local income sources, members of many households migrate temporarily in search of work. Swidden agriculture …	Central American pine-oak forests; Central American dry forests	Tropical and subtropical coniferous forests; Tropical and subtropical dry broadleaf forests	There have been recent prohibitions on the use of fire. There are also attempts to reduce agricultural fire use through promoting other agricultural methods. Initiated in 1999, the Special Program for Food Security (SPFS) is a programme sponsored by the governments of Guatemala, Honduras, and Nicaragua, with most funding and technical support provided by the Spanish Agency for International Coope…	There are two planting seasons each year- a first crop is sown in May or June and a second in August or September
166.b	2004	Nicaragua	Pochotillos community, Municipality of San Francisco Libre, Managua Department	V1	12.512	-86.293	Most farmers practice swidden agriculture where the main crops are maize, sorghum and beans. Most farmers produce only for subsistence as production levels are low and infrastructure poor. There is very little off-farm income. Some farmers have pasture areas. Many farmers use chemical imputs	Central American dry forests	Tropical and subtropical dry broadleaf forests	There have been recent prohibitions on the use of fire. There are also attempts to reduce agricultural fire use through promoting other agricultural methods. Initiated in 1999, the Special Program for Food Security (SPFS) is a programme sponsored by the governments of Guatemala, Honduras, and Nicaragua, with most funding and technical support provided by the Spanish Agency for International Coope…	There are two planting seasons each year- a first crop is sown in May or June and a second in August or September
167.a	2002-2004	Indonesia	The neighbouring villages of Lukuwinggur and Kiritana on Sumba Island, Nusa Tenggara Timur Province	V23	-9.783	120.248	Subsistence agriculture, livestock raising, and collection of forest products are the main livelihood activities. In Kiritana foodcrops are relatively most important, and in Lukuwinggir livestock and forest products are most important	Sumba deciduous forests	Tropical and subtropical dry broadleaf forests	The current Provincial Government forbids all cultural burning, following National perspectives and guidelines (which have their origins in Dutch colonial regulations). This is unenforced and unenforceable	These are relatevely-speaking (within Indonesia) very poor rural communities
167.b	2002-2004	Indonesia	The nearby villages of Dhereisa and Dorameli in Ngada Regency, Flores Island, Tenggara Timur Province	V23	-8.73	121.231	Subsistence agriculture and livestock raising, and collection of forest products are the main livelihood activities. Weaving of textiles and production of palm toddy (from Arenga pinnata) also contribute significantly to peoples’ livelihoods in these villages	Lesser Sundas deciduous forests	Tropical and subtropical dry broadleaf forests	The current Provincial Government forbids all cultural burning, following National perspectives and guidelines (which have their origins in Dutch colonial regulations). This is unenforced and unenforceable	These are relatevely-speaking (within Indonesia) very poor rural communities
168.a	1998-?	Madagascar	Villages of Maharidaza, Ambatoharanana, Antaniditra and Antakavana in peripheral zone to Ambohitantely Special Reserve	V45	-18.267	47.571	Merina, Betsilea and Betsimisaraka people. Rice is the principle crop, grown in the irrigated and often terraced areas near valley bottoms. In addition tanety (hillside sloping land) is used for grazing and the growing of manioc, groundnuts, beans and fruit trees. Zebu cattle are raised as much for their social status and prestige as for their agricultural functions, the former linked to the deep…	Madagascar subhumid forests	Tropical and subtropical moist broadleaf forests	There is a state prohibition on burning. From the mid 1980s Madagascar embraced conservation discourse of funders like WWF and USAID, and adopted a Environmental Action Plan (EAP) in 1988. From 1997 onward the focus was on 'integrated conservation and devleopment' and 'decentralisation'. Village communities organized in users’ associations could request concessions from the state, such as exclusi…	The authors emphasise the considerable social heterogeneity in the area, and criticise stereotyped descriptions of local society in many scholarly works and reports.
169.a	1999-2001	Madagascar	9 villages in the Vohidrazana/Beforona area, located at the margins of the Ankeniheny-Zahamena rainforest corridor	R	-18.962	48.424	Betsimisaraka people. Swidden agriculture (tavy) of upland rice is the traditional land use practice. Rice is grown for one season, followed by a root crop such as manioc or sweet potato, before fallow. The tavy field is not just a rice field per se, but is a mixed cropping system with a multitude of crops planted in large spacing within the rice crop. Except for tall corn plants, other crops are…	Madagascar lowland forests	Tropical and subtropical moist broadleaf forests	Tavy is illegal by law, and there have been regional cases of imprisonment of farmers.
170.a	2004	Panama	Indigenous Tierra Colectiva of Ipeti-Embera (78°30′–78°34′ W, 8°55′–9°00′ N)	V1	8.958	-78.533	Embera people. Like many other smallholders in marginal environments, the Emberá of Ipetí participate in a dual economy. They produce goods for the market, primarily timber, beef and yams, and purchase goods with cash. At the same time, they produce basic goods for their own consumption, practising swidden agriculture of rice, corn, yam, yuca, beans, banana and plantain. The swidden–fallow agricu…	Isthmian-Atlantic moist forests	Tropical and subtropical moist broadleaf forests	U	Authors find significant disparities in wealth iwthin the community
171.a	1998-2000	India	40 km sq. study area at the foot of the Palni Hills, Dindigul District, Tamil Nadu State, including the Kadavakurichi Reserved Forest and 19 adjacent villages (77°46’ - 77°51’ E, 10°05’ -10°10’ N)	R	10.125	77.808	19 castes are represented in the area, but most are people of the Moopar, Thevar and Nayakkar castes. Outside the reserved area, most land is used for cultivation, and 45% of cultivated areas are irrigated. Under half of households keep livestock that are grazed on fields after the harvest, and in the forest during the agricultural season. Many people work as agricultural labourers. People also c…	South Deccan Plateau dry deciduous forests	Tropical and subtropical dry broadleaf forests	The reserved forest status means that all activities in the area require permission from the Indian Forest Service. Forest fire policy in India is still similar to that of the British colonial government in the 1800s. The National Forest Policy of 1998 focuses on fire prevention and control. The Ministry of Environment and Forest implemented a plan called “Modern Forest Fire Control Methods” whic…
172.a	2003	Cameroon	Village of Nkometou	V1	4.05	11.548	The area has a high population density (85.3 people/km sq.), good market access and intensive semi-permanent agriculture (involving shorter fallow periods, but rarely chemical inputs). The mixed food crop field or afub owondo (literally, groundnut field) is the most common field type and the principal source of food for most semi-subsistence farming households in the study area, consisting of gro…	Northwestern Congolian lowland forests	Tropical and subtropical moist broadleaf forests	U
172.a	2003	Cameroon	Village of Akok	V1	2.754	11.224	The area is far from major markets, has a low population desnity (7.8 people /km sq) and extensive swidden agriculture. The mixed food crop field or afub owondo (literally, groundnut field) is the most common field type and the principal source of food for most semi-subsistence farming households in the study area, consisting of groundnuts, corn, plantain, cassava and other root crops cultivated …	Atlantic Equatorial coastal forests	Tropical and subtropical moist broadleaf forests	U
172.a	2003	Cameroon	Village of Awae	V1	3.576	11.604	The area is intermediate to Nkometou and Akok in population density (35.9 people / km sq) and market access. Agriculture is moderately extensive. The mixed food crop field or afub owondo (literally, groundnut field) is the most common field type and the principal source of food for most semi-subsistence farming households in the study area, consisting of groundnuts, corn, plantain, cassava and ot…	Northwestern Congolian lowland forests	Tropical and subtropical moist broadleaf forests	U
173.a	2000-2002	Canada	Community of Iskatewizaagengan No. 39 Independent First Nation of Shoal Lake, Ontario	V1	49.625	-95.1	Anishinaabe people	Western Great Lakes forests	Temperate broadleaf and mixed forests	In 1878 the first Fire Act was passed in Ontario in attempts to eradicate fire from forests, and in response to the increase in fires due to settlement, logging and railways. To 1960, the legislation became increasingly punitive, and the state increasingly developed infrastructure and technology for surveillance of fire risk, and to carry out fire suppression. There was also effort to educate the…
173.b	1999, 2001	Mexico	Ejido of Basihuare, Municipality of Guachochi, Chihuahua state	V1	27.534	-107.339	Rarámuri people. Many people are involved with the timber industry. Permanent cultivation of corn is practised on relatively flat land with deep soils, On forested slopes, swidden cultivation, 'Kumerachi', involves the clearing of wooded areas for firewood and planting beans.	Sierra Madre Occidental pine-oak forests	Tropical and subtropical coniferous forests	Under the ejido system, the Raramuri's forests were put under forest management for timber, and the Raramuri have participated in forestry. Fire, firewood collection and creating small agricultural plots is not prohibited by law, but as these practices have never been included in forest management plans for ejidos, they have also never been approved. The people have also been told by local author…
174.a	2003-2004	Indonesia	Villages of Dhereisa and Dorameli in Ngada District on Flores Island and villages of Kuhiwatu Kiritana, Pray Kalipar, Ngaruki Hiri and Lukuingir in East Sumba District on Sumba Island, Nusa Tenggara Timur Province (see map)	R	-8.73	121.231	Rural people. Swidden agriculture and livestock production are the most important activities. In Ngada agriculture is relatively more important, and in East Sumba livestock are relatively more important.	Sumba deciduous forests; Lesser Sundas deciduous forests	Tropical and subtropical dry broadleaf forests	Indonesian legislation calls for zero-burning. Regulation No 4/2001 on 'Control of Environmental Degradation and or Pollution Related to Forest and Land Wildfire' mandates in Article 11, that 'no one shall be conducting forest and or land burning'. This was passed in the aftermath of the 1997-1998 disastrous fires in Indonesia, when the Government was under strong international pressure, particul…	The paper focuses on grassland fires as these account for most of the area burned annually
175.a	U	Mexico	Communities of Sacabah and Xnohuayab in Yucatan State	V23	20.462	-89.222	Maya people, traditionally practising milpa swidden agriculture. In most of the northern Yucatan, neither plow nor tractor can be used because of the prevalence of rocky outcroppings. The crops are interspersed, including maize, beans, squash, chilies and some root crops (including sweet potato and manioc)	Yucatán dry forests	Tropical and subtropical dry broadleaf forests	In response to large wildfires in 1998, SEMARNAT, the federal environmental protection agency, sought to replace the use of fire in agriculture. One suggested alternative was the use of green manure/ cover crop systems, in particular mucuna/maize, which has been promoted by NGOs in Mexico since the early 1990s, including the Program for the Management and Conservation of Tropical Natural Resrouce…
176.a	2002; 2003	Mexico	Village of Señor, Ejido of X-Maben in Municipality of Felipe Carrillo Puerto, Quintana Roo State	V1	19.808	-88.175	Yucatec Maya, practising milpa swidden agriculture, with maize, beans and squash as the man crops. Inorganic fertiliser applied at the base of each corn plant is in widespread use, but weeding is generally done by hand and use of chemical herbicides is rare. Nearly all households rely on firewood as their main source of fuel, which is collected from trees and stumps spared at the time of felling …	Yucatán moist forests	Tropical and subtropical moist broadleaf forests	U
177.a	U	Burkina Faso	Bwaba lands	U	11.37	-2.977	Bwaba people	U	U	U
177.b	U	Togo	Bassar	U	9.27	0.776	Bassar people	West Sudanian savanna	Tropical and subtropical grasslands, savannas, and shrublands	U
178.a	2003	Bolivia	4 communities in the Chiquitano Indigenous territory of Lomerio	V45	-16.771	-61.828	Chiquitanos- descendents of indigenous groups who lived in the Jesuit missions in the region in the 1600s and 1700s. Swidden agriculture is practised	Chiquitano dry forests	Tropical and subtropical dry broadleaf forests	Severe wildfires devastated the southeastern Bolivian lowlands during 1999–2001. In response, the Bolivian government instituted an education campaign to reduce rural burning, with a tapir dressed as a forest ranger as a mascot, similar to Smokey Bear of the U.S. Forest Service fire prevention campaign. The Bolivian campaign, led by the national forestry agency (Superintendencia Forestal ), uses …
179.a	U	Indonesia	Area in and around part of the Bukit Barisan Selatan National Park, Sekincau District, Lampung Province, Sumatra	R	-5.442	104.364	Most communities are of seasonal and permanent migrants from other larts of Lampung and the island of Java, and the main ethnic groups are Semendo, Javanese and Sundanese. Small holder coffee production and illegal logging are the main land uses. Although land tenure security in this site is weak, because most of the coffee gardens are located inside the National Park, “private” land tenure in th…	Sumatran montane rain forests	Tropical and subtropical moist broadleaf forests	In the context of intense wildfires since the 1980s, and especially in the 1997-1998 El Nino-induced drought years, national-level reforms in land-use planning policies to address risks of large-scale land clearing and burning have been recommended by a diverse array of Indonesian forestry and environmental officials, local and international NGOs and aid agencies, and governments of neighboring n…
179.b	U	Indonesia	Menggala, Tulang Baway District, Lampung Province, Sumatra	R	-4.507	105.219	In coastal swamp areas there are Mesuji people, practising swidden rice cultivation (sonor), and 15 villages established between 1993-1999 under the Government's transmigration program. In the swamps there are also corporate oil palm plantations. In the peneplains there are Menggala people practising swidden agriculture and fishing, and there are also corporate timber plantations. Transmigration …	Sumatran peat swamp forests; Sumatran lowland rain forests	Tropical and subtropical moist broadleaf forests	In the context of intense wildfires since the 1980s, and especially in the 1997-1998 El Nino-induced drought years, national-level reforms in land-use planning policies to address risks of large-scale land clearing and burning have been recommended by a diverse array of Indonesian forestry and environmental officials, local and international NGOs and aid agencies, and governments of neighboring n…
179.c	2000	Indonesia	Rambah, Tebing Tinggi, Bukit Kemang and Sungai Sarap villages, Tanah Tumbuh sub-district, Muara Bungo District, Jambi Province, Sumatra	V45	-1.467	101.882	The site is an expired logging concession, reclaimed by the original inhabitants of the area. Village settlements are located along the Batang Ule River, while wet rice fields are located in the valleys and flat areas. Smallholder perennial crop systems dominated by rubber are located on the surrounding hills. There are also large scale oil palm plantations in the area.	Sumatran lowland rain forests	Tropical and subtropical moist broadleaf forests	In the context of intense wildfires since the 1980s, and especially in the 1997-1998 El Nino-induced drought years, national-level reforms in land-use planning policies to address risks of large-scale land clearing and burning have been recommended by a diverse array of Indonesian forestry and environmental officials, local and international NGOs and aid agencies, and governments of neighboring n…
179.d	1999	Indonesia	Bayung Lincir and Sungsang sub-districts, Musi Banyo Asin District, South Sumatra Province, Sumatra	R	-2.334	104.192	Javanese people have lived in the area since the seventeenth century, Buginese from Sulawesi arrived in 1964, and since the 1980s transmigration programs have seen in-migration by people from Java, Madura and Bali. Logging concessions, illegal logging and fishing are key land uses.	Sumatran peat swamp forests; Sunda Shelf mangroves	Tropical and subtropical moist broadleaf forests; Mangrove	In the context of intense wildfires since the 1980s, and especially in the 1997-1998 El Nino-induced drought years, national-level reforms in land-use planning policies to address risks of large-scale land clearing and burning have been recommended by a diverse array of Indonesian forestry and environmental officials, local and international NGOs and aid agencies, and governments of neighboring n…
179.e	2000	Indonesia	Danau Sentarum National Park and some of surrounding area, West Kalimantan Province, Borneo	R	0.904	112.116	The area is home to two distinct ethnic groups with different settlement and resource use. Melayu fisher people make up the majority of the population and live along rivers and around lakes. They are almost solely dependent on income from selling wild and caged fish. Honey harvesting, rattan and timber, and semi-permanent cultivation of rice, rubber and vegetables on large river levees, are secon…	Borneo peat swamp forests; Southwest Borneo freshwater swamp forests; Borneo lowland rain forests; Sundaland heath forests	Tropical and subtropical moist broadleaf forests	The National Park was gazetted in 1982, but management is minimal and the local communities living in the Park remain the de facto managers of the area. In the context of intense wildfires since the 1980s, and especially in the 1997-1998 El Nino-induced drought years, national-level reforms in land-use planning policies to address risks of large-scale land clearing and burning have been recommend…
179.f	U	Indonesia	Lower Belitang Subdistrict, eastern part of Jangkang subdistrict, and northern part of Mukok sub-district, north of the Kapuas River. Sanggau District, West Kalimantan Province, Borneo	V45	0.361	110.936	Dayak people of Mualang and Jangkang language groups, also Melayu people on some riverside areas. Indigenous subsistence swidden agriculture of rice and vegetables, and agroforestry (mixed species forest gardens dominated by rubber cash crop), corporate oil palm and timber plantations are other land uses in the area.	Borneo lowland rain forests	Tropical and subtropical moist broadleaf forests	In the context of intense wildfires since the 1980s, and especially in the 1997-1998 El Nino-induced drought years, national-level reforms in land-use planning policies to address risks of large-scale land clearing and burning have been recommended by a diverse array of Indonesian forestry and environmental officials, local and international NGOs and aid agencies, and governments of neighboring n…
179.g	2000	Indonesia	Tumbang Titi subdistrict, Ketapang district, East Kalimantan Province, Borneo	R	-1.834	110.671	Most people in the area are Dayak people of the Pesaguan and Suku Jelai language groups. Indigenous swidden agriculture, agroforestry, and small-holder oil palm, corporate oil palm and timber plantations are key land uses. The area has seen in-migration, mostly of Javanese people, under the Government's transmigration program. The transmigrant villages and oil palm plantations are in the northwes…	Southwest Borneo freshwater swamp forests; Borneo peat swamp forests; Borneo lowland rain forests; Sundaland heath forests	Tropical and subtropical moist broadleaf forests	In the context of intense wildfires since the 1980s, and especially in the 1997-1998 El Nino-induced drought years, national-level reforms in land-use planning policies to address risks of large-scale land clearing and burning have been recommended by a diverse array of Indonesian forestry and environmental officials, local and international NGOs and aid agencies, and governments of neighboring n…
179.h	1999	Indonesia	Area including the Long Tutug Transmigration area and communities of Long Apui and Lepo' Umit, Long Segar, East Kalimantan Province, Borneo	V23	0.814	116.884	Uma' Jalan Kenyah people. Indigenous swidden agriculture and agroforestry (rubber, cacao, coffee, fruits), corporate oil palm and timber plantations are key land uses. The area has seen in-migration under the Government's transmigration program (mostly of Javanese people). Some people in the transmigration area keep livestock	Borneo lowland rain forests; Sundaland heath forests	Tropical and subtropical moist broadleaf forests	In the context of intense wildfires since the 1980s, and especially in the 1997-1998 El Nino-induced drought years, national-level reforms in land-use planning policies to address risks of large-scale land clearing and burning have been recommended by a diverse array of Indonesian forestry and environmental officials, local and international NGOs and aid agencies, and governments of neighboring n…
180.a	U	Indonesia	Villages of Sungai Cambai and Talang Batu, and transmigrant villages of Wonosari and Dwi Karya Mustika, Mesuji subdistrict, Tulang Baway District, Lampung Province, Sumatra	V45	-4.084	105.507	Settlement in the areas since 1800s. There has been in-migration through Government transmigration programs. There are commercial oil palm, coconut and timber plantations in the area. Sonor, a traditional system of rice cultivation, is practised in years with droughts lasting five to six months. In other years Gelam (Melaleuca cajuputi) timber harvesting and processing and fishing are common	Sumatran peat swamp forests	Tropical and subtropical moist broadleaf forests	U
180.b	U	Indonesia	Bukit Batu transmigrant village, four subvillages, and part of the Padang Sugihan Wildlife Reserve, Air Sugiham subdistrict, Ogan Komering Ilir district, South Sumatra province, Sumatra	V45	-2.735	105.372	Settlement is recent (est. 1960s-70s). There has been transmigration settlement, through Government programmes. Sonor, a traditional system of rice cultivation, is practised in years with droughts lasting five to six months. In other years Gelam (Melaleuca cajuputi) timber harvesting and processing and fishing are common	Sumatran peat swamp forests	Tropical and subtropical moist broadleaf forests	The Wildlife Reserve was established in 1983
181.a	U	Indonesia	Petapahan, Tapung sub District, Kampar, District, Riau Province, Sumatra	U	0.587	101.005	Local communities have practised swidden agriculture for many years, but many farmers have now planted tree cash crops (mostly rubber and oil palm). Since the 1970s there has been commercial logging concessions, and, since the early 1990s, oil palm plantation and timber plantation development in the area. Particularly in the logging industry, few people are employed from the local community, but …	Sumatran lowland rain forests	Tropical and subtropical moist broadleaf forests	In 1998, the Government introduced a ban on burning for large-scale land preparation
182.a	U	Brazil	Distrito Federal	R	-15.753	-47.79	Smallholder subsistence farmers, keeping livestock and growing crops. Distrito Federal communities are unusual in that they are comprised of a mixture of people from many different areas of Brazil.	Cerrado	Tropical and subtropical grasslands, savannas, and shrublands	Decree No 231/83 of 1988 requires that permission is obtained for burning from IBAMA before carrying out a burn (permission valid for 30 days). Ministerial Decree No 229/75 5 acknowledges the necessity of fire in agriculture, but only according to rules set out in Article 27 of Federal Law No 4.771 of 15/9/65 (Forest Code). These are: 1) that IBAMA must be informed and a license obtained a minimu…	Author notes that the small number of farmers interviewed (40) makes it difficult to generalise about fire use by farmers of Distrito General, yet alone the region in general
183.a	U	Brazil	5 of the 16 villages in the Krahô indigenous reserve (Manuel Alves, Santa Cruz, Morrodo Boi, Campo Limpo, Pedra Branca), approximately 100 km northeast of Palmas, in the municipalities of Goiatins and Itacajá, near the Maranhão border	V45	-8.353	-47.437	Krahô people, practising hunting, gathering and swidden agriculture	Cerrado; Mato Grosso seasonal forests	Tropical and subtropical grasslands, savannas, and shrublands; Tropical and subtropical moist broadleaf forests	In conservation areas, environmental legislation has allowed the use of fire since 1989 for managing nature reserves (Federal Decree No. 97635 of April 10, 1989), but in reality few government officials permit these to take place. Brazilian law also acknowledges the necessity of fire for agricultural purposes (Ministerial Decree N◦ 229/75 of May 7, 1975), but prescribed burns can only take place …
184.a	U	Laos	The south of the Sayabury province	R	18.398	101.331	A hilly landscape mostly used by Lao farmers to grow annual cash crops.	Luang Prabang montane rain forests	Tropical and subtropical moist broadleaf forests	Land reform policies in Laos aim to increase land tenure security to encourage farmer involvement in intensive farming, and to eliminate slash-and-burn agriculture. In 1994, the government decided that shifting cultivation should be eliminated by the year 2000; in 2000, the goal was postponed until 2020 (MAF, 2000) and then in 2003, brought back to 2010. These publicly proclaimed ambitions were a…
184.b	U	Laos	Vientiane plain around the capital Vientiane in the Mekong valley	R	18.086	102.693	A paddy rice area, mainly inhabited by Lao farmers	Northern Khorat Plateau moist deciduous forests	Tropical and subtropical moist broadleaf forests	Land reform policies in Laos aim to increase land tenure security to encourage farmer involvement in intensive farming, and to eliminate slash-and-burn agriculture. In 1994, the government decided that shifting cultivation should be eliminated by the year 2000; in 2000, the goal was postponed until 2020 (MAF, 2000) and then in 2003, brought back to 2010. These publicly proclaimed ambitions were a…
184.c	U	Laos	Phongsaly province	R	21.657	102.281	A mountainous area subject to slashand-burn agriculture by farmers belonging to non-Lao ethnic groups.	Northern Indochina subtropical forests	Tropical and subtropical moist broadleaf forests	Land reform policies in Laos aim to increase land tenure security to encourage farmer involvement in intensive farming, and to eliminate slash-and-burn agriculture. In 1994, the government decided that shifting cultivation should be eliminated by the year 2000; in 2000, the goal was postponed until 2020 (MAF, 2000) and then in 2003, brought back to 2010. These publicly proclaimed ambitions were a…
185.a	1997-?	Thailand	Upper Nan Watershed Management Project area covering 45 villages in the north west of Nan Province.	R	19.298	100.7	The area include people of Northern Thai, Thai Lue, Hmien, Khamu and Hmong ethnic groups. Upland rice swidden agriculture, paddy rice and orchards are the main land uses (though only 10.9% of the watershed area is used for agriculture as it is so steeply sloping)	Northern Thailand-Laos moist deciduous forests	Tropical and subtropical moist broadleaf forests	25 of the villages are located within national forest reserves. There has been recent empowerment of sub-district administrations and rural communities under the Tambon Administration Act of 1995 and the 1997 national constitution to have an increased role in managing natural resources. In 1999, a government guideline was issued that 20% of the sub-district budget should be spent on natural resou…
186.a	1981-1993	Australia	Western Arnhem Land, Northern Territory.	R	-12.601	133.613	Historically, the study region was owned by gunmogurrgurr (clans) from six or so separate language groups. Today, most of these languages are either extinct or seldom spoken and one language, Gundjeihmi, is commonly used in the Kakadu region. People consume a wide range of foraged plants and hunted animals, though shop bought foods have substantially replaced bush foods in diets	Arnhem Land tropical savanna	Tropical and subtropical grasslands, savannas, and shrublands	U
187.a	1995-1997	Australia	Kuku-Yalanji native title lands, inland from and around the small towns of Mossman and Wujal Wujal, including part of the Wet Tropics World Heritage Area	V23	-16.168	145.231	Kuku-Yalanji Aboriginal people (a group of some 3000 people), concentrated in the small towns of Wujal Wujal and Mossman, whose native title rights extend over several 100,000 ha., much of which is included in the WTWHA. Some subsistence hunting and gathering is still practiced, but people are also involved in cattle farming, sugar cane farming, and tourism.	Queensland tropical rain forests	Tropical and subtropical moist broadleaf forests	The Wet Tropics Management Authority (WTMA). est. 1990, is the primary policy and planning agency for the World Heritage Area, under an agreement between the Australian federal government and the Queensland state government, whose agencies retain responsibility for day-to-day management. For the WTWHA managers, authority to manage fire is derived from the Wet Tropics Plan 1998, a regulation under…
188.a	U	Australia	Clan Estate of Dukladjarranj, north-central Arnhem Land, Northern Territory (see map)	V1	-12.678	134.313	Gunei language group Aboriginal people responsible for the Dukaladjarranj clan estate (one extended family). In the area people live in small communities, or outstations. The range utilized by the band consists of a number of traditional parcels of land (estates) over which members of the band have usufructuary rights. Estates may be defined loosely as aggregations of associated named sites, or b…	Arnhem Land tropical savanna	Tropical and subtropical grasslands, savannas, and shrublands	The Federal Native Title Act 1993 protects the right of native title holders to carry out hunting and gathering activities on lands with which they retain connection, and these activities may include the use of fire. Recent decisions of Australia's High Court have confirmed elements of these rights, despite potentially conflicting legislation in the States and Territories.
189.a	1997-2007	Australia	The Arnhem Land Plateau, Northern Territory	R	-12.622	134.925	Aboriginal people of the Bininj Kunwok language group	Arnhem Land tropical savanna	Tropical and subtropical grasslands, savannas, and shrublands	U	The Arnhem Land Plateau (or Rocky Country) is the north-eastern part of Arnhem Land. Unlike the Western parts of Arnhem Land, this area does not have large wetland areas
189.b	2005	Australia	Kunbarlanja, Western Arnhem Land	V1	-12.35	133.062	Aboriginal people	Arnhem Land tropical savanna	Tropical and subtropical grasslands, savannas, and shrublands	U
190.a	1997	Panama	Cerro Punta, Chiriqui	V1	8.873	-82.583	Smallholder farmers, practising swidden cultivation. The main crops planted by farmers are yucca, maize, rice and beans. Many farmers also practice some form of agroforestry, including fruit trees (incl. orange, mango, banana, plantain and lime among others) in home gardens, intercropping of fruit trees with crops, in live fences, and as shade for coffee plants. Many farmers also plant timber tre…	Talamancan montane forests	Tropical and subtropical moist broadleaf forests	The AMISCONDE agroforestry project, executed by the NGO La Fundación para el Desarrollo Sostenible de Panamá (FUNDESPA) was active in the area from 1993-1997, promoting soil conservation, organic agriculture and agroforestry.
190.b	1997	Panama	Granadilla, Coclé	V1	8.431	-80.314	Smallholder farmers, practising swidden cultivation. The main crops planted by farmers are yucca, maize, rice and beans. Many farmers also practice some form of agroforestry, including fruit trees (incl. orange, mango, banana, plantain and lime among others) in home gardens, intercropping of fruit trees with crops, in live fences, and as shade for coffee plants. Many farmers also plant timber tre…	Panamanian dry forests	Tropical and subtropical dry broadleaf forests	The Agroforestry Project for Community Development, executed by the Government Agency the Instituto Nacional de Recursos Naturales Renovables (INRENARE) was active in the area from 1989 to present, establishing agroforestry nurseries, reforestation, crop production, small animal husbandry and fish ponds.
190.c	1997	Panama	El Piral, Coclé	V1	8.452	-80.536	Smallholder farmers, practising swidden cultivation. The main crops planted by farmers are yucca, maize, rice and beans. Many farmers also practice some form of agroforestry, including fruit trees (incl. orange, mango, banana, plantain and lime among others) in home gardens, intercropping of fruit trees with crops, in live fences, and as shade for coffee plants. Many farmers also plant timber tre…	Panamanian dry forests	Tropical and subtropical dry broadleaf forests	The Sustainable Farm Project (an agroforestry project), executed by the Government Agency the Instituto Nacional de Recursos Naturales Renovables (INRENARE) has been active in the area since 1993, establishing agroforestry nurseries, reforestation, crop production, small animal husbandry and fish ponds.
190.d	1997	Panama	6 communities in Chorrera district, Panamá	R	8.88	-79.84	Smallholder farmers, practising swidden cultivation. The main crops planted by farmers are yucca, maize, rice and beans. Many farmers also practice some form of agroforestry, including fruit trees (incl. orange, mango, banana, plantain and lime among others) in home gardens, intercropping of fruit trees with crops, in live fences, and as shade for coffee plants. Many farmers also plant timber tre…	Isthmian-Atlantic moist forests	Tropical and subtropical moist broadleaf forests	The Reforestation in Micro-Watersheds in Communities of the Amador area of the Canal Watershed project (an agroforestry project) was executed by the National public services regulator Utoridad Nacional de los Servicios Públicos (ASEP) in the area from 1995 to 1997, promoting reforestation using the taungya system
190.e	1997	Panama	Las Pavas and Los Hules, Panamá	V1	9.094	-79.875	Smallholder farmers, practising swidden cultivation. The main crops planted by farmers are yucca, maize, rice and beans. Many farmers also practice some form of agroforestry, including fruit trees (incl. orange, mango, banana, plantain and lime among others) in home gardens, intercropping of fruit trees with crops, in live fences, and as shade for coffee plants. Many farmers also plant timber tre…	Isthmian-Atlantic moist forests	Tropical and subtropical moist broadleaf forests	The Extension and Soil Conservation in two Communtiies of Lake Gatun Project (an agroforestry project) was executed in the area by the NGO Caritas from 1993 to 1996, involving agroforestry nursery establishment, promotion of organic agriculture and soil conservation
191.a	U	USA	Klamath-Siskiyou bioregion	R	41.44	-123.202	Karuk, Yurok, and Hupa descendants or tribal members	Klamath-Siskiyou forests	Temperate coniferous forests	Fire suppression policies, regional air quality restrictions, permits and fees, liability for escape fires or criminal charges for arson, and landowner social demographic changes all restrict or make Indigenous fire use impossible. Tribes are required to develop smoke management plans
192.a	1997	Honduras	Atlantida Department	R	15.652	-87.103	Smallholder farmers practising swidden maize agriculture, or a slash-and-mulch maize-mucuna system. Those who cultivate maize using traditional methods typically double-crop dry- and wet-season maize. Maize cultivation may also employ considerable purchased inputs, mostly commercial fertilizers (urea or a formula fertilizer or both) and herbicides (2-4D and paraquat)	Central American Atlantic moist forests	Tropical and subtropical moist broadleaf forests	U
193.a	1998	Senegal	Central eastern part of Senegal along the border with Mali, between 15degN 14degW and 13degN 12degW. It covers approximately 2 million ha. and mainly covers Tambacounda District with its northern part in the Saint-Louis district	R	14	-13	Agricultural production in the north of the study area is dominated by millet, while considerable production of groundnuts is found in the south.	West Sudanian savanna	Tropical and subtropical grasslands, savannas, and shrublands	The Senegalese Forestry Commission (Direction des Eaux et Forets) includes a division for fire fighting and prevention that is responsible for developing strategies for better fire control, including issues such as techniques for making fire breaks and for fighting active fires as well as identifying fires in the field. Fires have, at best, an uncertain legal status, and at worst are considered i…
194.a	1997	Belize	San Jose village, Toledo District	V1	16.266	-89.094	Maya smallholder farmers practising swidden milpa agriculture of corn, rice and beans. There are two cropping cycles per year- the first crop is planted in April-May, and the second in November. The first crop is a swidden crop, and the second is grown on the same plot each year, in a slash-and-mulch system using cover crops (without use of fire), and is known as the matahambre crop. 6% of the po…	Petén-Veracruz moist forests	Tropical and subtropical moist broadleaf forests	U
195.a	U	Spain	A dehesa (open Quercus rotundifolia woodland) situated in the NW of the province of Salamanca. The region forms part of the North Meseta	U	40.977	-6.5	Farmers, using dehesas for extensive livestock (cattle and sheep) grazing	Iberian sclerophyllous and semi-deciduous forests; Northwest Iberian montane forests	Mediterranean forests, woodlands, and shrub	U
196.a	1994-1996	Democratic Republic of Congo	Field site between Wamba and Irumu towns, Ituri Forest (northeastern DRC)	V23	1.918	28.887	Farmers practising swidden agriculture of cassava, peanuts, sweet potatoes, rice	Northeastern Congolian lowland forests	Tropical and subtropical moist broadleaf forests	U
197.a	1997	Indonesia	Sepunggur administrative area, Jambi Province, Sumatra	R	-1.511	102.269	Smallholder rubber producers (average farm size approx 5 ha). Rubber gardens are the major land use type in this area, small producers are the main contributors, and most of the forest that is presently converted for agricultural use is being planted with rubber seedings.	Sumatran lowland rain forests	Tropical and subtropical moist broadleaf forests	A ban on the use of fire to clear land for agriculture was enacted in 1997, as a renewal of a ban that was initially enacted in 1984.
198.a	U	Madagascar	Ankarafantsika plateau, 100km south of the town of Mahajanga at the northwest coast (16° 15' S, 46° 55' E).	U	-16.25	46.917	Rice is the most important agricultural crop. Cattle rearing is also important	Madagascar dry deciduous forests	Tropical and subtropical dry broadleaf forests	In Madagascar there has been a prohibition of almost any use of fire by the colonial authorities and later on by the independent Malagasy government. Only recently a discussion started between environmental agencies (governmental and private) on a more flexible but controlled use of fire respecting the characteristics of the vegetation and the defined management objectives. In 1994, Conservation …
199.a	1996	India	Punjab State. The study covered 11 of the 14 districts and 48 of the 137 blocks of Punjab dominated by rice-wheat cropping system	R	31.147	75.341	Mixture of farmers with smaller and larger landholdings from <2ha to > 20 ha (average landholding 10 ha). Most farmers use a rice-wheat cropping system, and most own some cattle. 79 per cent of the sample farmers owned a tractor. Only 6 per cent farmers possessed combine harvesters used for harvesting rice and wheat (but a large number of farmers used combine harvesters)	Northwestern thorn scrub forests	Deserts and xeric shrublands	U
200.a	1994	Brazil	Government-sponsored colony of Pedro Peixoto in Acre State	V1	-10.189	-67.588	The colony (370,000 ha) is divided into 3700 parcels with distribution to 3200 families (mean parcel size of 88 ha, of which 34% cleared in 1995). Some settlers were born and last lived in Acre, while others moved from elsewhere in Brazil. Swidden agriculture and cattle rearing are the main livelihoods, with rice as the major crop. As a proportion of the total farm area, 25% is in pasture, 2% in …	Iquitos varzeá; Southwest Amazon moist forests	Tropical and subtropical moist broadleaf forests	Brazil's National Institute for Colonization and Agrarian Reform (INCRA) instituted a Program for National Integration (PIN) in 1970 to assist the rural poor, with land being allocated to settlers in settlement projects. The Pedro Peixoto site was established in 1972
200.b	1994	Brazil	Government-sponsored colony of Theobroma in Rondonia State	V1	-10.246	-62.35	The colony (300,000 ha) has 3000 families, with mean parcel size of 76 ha. Heads of household were mobile before coming to the settlement, and few were born, raised or lived previously in Amazonia. Swidden agriculture and cattle rearing are the main livelihoods, with rice as the major crop. Of the total farm area, in 1995, 29% was in pasture, 4% in fallow, 9% in annual crops and 8% in perennial c…	Madeira-Tapajós moist forests	Tropical and subtropical moist broadleaf forests	Brazil's National Institute for Colonization and Agrarian Reform (INCRA) instituted a Program for National Integration (PIN) in 1970 to assist the rural poor, with land being allocated to settlers in settlement projects. Theobroma was established in 1979
200.c	1996	Peru	Pucallpa, Department of Ucayali	V1	-8.384	-74.579	Families have mean parcel size of 35 ha. In 1996, 25% of total farm area was in pasture, 29% in fallow, 6% in annual crops and 8% in perennial crops. Upland rice is usually the first crop grown after clearing forest, followed by maize or cassava in the second year	Iquitos varzeá	Tropical and subtropical moist broadleaf forests	U
201.a	1996	Vietnam	Nguyen Binh District, Cao Bang Province	R	22.631	105.943	Farmers practicing `composite swiddening' involving shifting cultivation in the uplands and wet rice cultivation in the lowlands. Rice is generally the first crop grown after slashing and burning a plot, for 1-2 years, followed by corn or cassava. Nguyen Binh has poorer market access and lower land scarcity than Ngan Son District. The interviewed farmers were of the Dzao ethnic group, though ther…	South China-Vietnam subtropical evergreen forests	Tropical and subtropical moist broadleaf forests	U
201.b	1996	Vietnam	Ngan Son District, Cao Bang Province	R	22.459	106.009	Farmers practicing `composite swiddening' involving shifting cultivation in the uplands and wet rice cultivation in the lowlands. Rice is generally the first crop grown after slashing and burning a plot, for 1-2 years, followed by corn or cassava. Ngan Son has better market access and higher land scarcity than Nguyen Binh District. The interviewed farmers were of the Dzao ethnic group, though the…	South China-Vietnam subtropical evergreen forests	Tropical and subtropical moist broadleaf forests	U
202.a	1995-1996	India	Village of Pali, Chamoli Pauri District, Uttarakhand State	V1	30.105	78.767	Farmers keeping livestock and practising 'simultaneous agroforestry' (cultivation of food crops every year on terraced slopes with scattered trees, which accounts for 28% of the village land cover, and takes place on private land), 'sequential agroforestry' (swidden agriculture of mung and soybeans on unterraced slopes devoid of trees, which accounts for 28% of the village landcover, and takes pl…	Himalayan subtropical pine forests	Tropical and subtropical coniferous forests	Agriculture and fire use by local communities in community and government lands are illicit as per the government forest policy but are widespread features because of ineffective enforcement of law and policy in dissected and inaccessible hilly terrain.
203.a	1989-1990	Brazil	Settlement of Arroz Cru da Gleba Pakissamba on the Left bank of Xingu River, municipality of Senador José Porfírio, approximately 20km north of Altamira, Para State, Brazil	V1	-2.692	-52.065	Caboclos or ribeirinhos (rural Amazon people of mixed Amerindian, Portuguese and Northeast Brazilian ancestry), practising swidden agriculture, with maize as the dominant crop. 98% of the parents of the current inhabitants also lived in the study area or nearby	Tapajós-Xingu moist forests	Tropical and subtropical moist broadleaf forests	In the 1970s under the National Integration Program, the people in the area were encouraged to move from fluvial islands to terra firme, and each family was given 100ha land with a definitive title.
204.a	U	Japan	Higashi-Iyayama (33deg52'N, 133deg54'E) in the Shikoku Mountains	V1	33.867	133.9	Rural dwellers	Taiheiyo evergreen forests	Temperate broadleaf and mixed forests	U
205.a	U	Mexico	Ejido of La Laja, Guerrero State	V1	18.099	-100.483	Farmers practising swidden agriculture in shrub and forest zones and semi-permanent agriculture in mountain valleys, growing mostly maize, beans and vegetables. The majority of subsistence farmers in western Guerrero are mestizo (mixed Spanish and Indigenous ancestry). The farmers in this Ejido, which is remote, lack access to wage labour opportunities, compared with more coastal communities.Ther…	Sierra Madre del Sur pine-oak forests	Tropical and subtropical coniferous forests	The Agarian Law implies that farmers may lose their cultivation rights for particular lands if they do not use them on a regular basis (i.e. if fallowed)
206.a	n/a	Indonesia	West Timor	R	-9.478	124.642	Rural peasants of the Meto ethnolinguistic group	Timor and Wetar deciduous forests	Tropical and subtropical dry broadleaf forests	U
207.a	U	Indonesia	East and West Timor	R	-9.277	124.949	Meto, Tetun and Bunak ethnolinguistic groups. Agriculture is still the main livelihood for more Timorese, and the staple crops are maize and sorghum, and in some areas, upland rice.	Timor and Wetar deciduous forests	Tropical and subtropical dry broadleaf forests	U
208.a	1979-1982, 1995	Indonesia	Trans-Fly, southern New Guinea	R	-8.757	140.988	Traditionally, the indigenous people of the Trans-Fly combine subsistence hunter-gatherer and small-scale cultivator lifestyles.	Trans Fly savanna and grasslands	Tropical and subtropical grasslands, savannas, and shrublands	U
209.a	U	French Guiana	Farms along the coast (see map)	R	5.082	-52.664	Small-scale farmers, generally growing tubers and fruits. There are also larger scale, higher input farms in the area	Guianan moist forests; Guianan mangroves	Tropical and subtropical moist broadleaf forests	U
210.a	2004-2011, 2013, 2019	Philippines	Cabayugan, Puerto Princesa City, central Palawan Island	V1	10.177	118.87	Tagbanua people, who draw on a mixed-livelihood portfolio, wherein swidden cultivation remains central, of upland dry rice and fallow crops (cassava, sweet potato etc). Non-timber forest products (NTFPs) (rattan, honey etc), coastal-marine harvests and off- and on-farm labour are also important. Many people have experimented with paddy rice farming and cash cropping of cacao, cashew, cassava, and…	Palawan rain forests	Tropical and subtropical moist broadleaf forests	The Spanish and American colonial governments tried to control swidden agriculture, particularly American colonial foresters, after 1900. Perspectives of swidden fires as environmentally destructive and primitive remained relatively unchanged with independence in 1946. In 1963 the Kaingin Law was passed stating that swidden farmers should be identified, managed and/or resettled, and in 1975, Pres…
211.a	1995-2005	India	Biligiri Rangaswamy Temple Tiger Reserve (BRT), Western Ghats	R	11.97	77.168	Soliga people: an indigenous tribal community living within the protected area. Traditionally, the Soligas were hunters and shifting cultivators and collected a wide range of nontimber forest products (NTFPs). When the BRT area was designated a wildlife sanctuary in 1972, shifting cultivation and hunting were completely banned, and the Soligas were allocated small pieces of land to practice settl…	South Deccan Plateau dry deciduous forests; South Western Ghats moist deciduous forests	Tropical and subtropical dry broadleaf forests; Tropical and subtropical moist broadleaf forests	When the BRT area was designated a wildlife sanctuary in 1972, shifting cultivation and hunting were completely banned, and the Soligas were allocated small pieces of land to practice settled agriculture. The Soligas retained the sole right to NTFP extraction under the aegis of tribal cooperatives. Fire use is prohibited in the Wildlife Sanctuary
212.a	1994-2002	Cambodia	Villages of Chrey, Samut Kraom and Loeun, Southern Ratanakiri Province	V23	13.374	107.161	Tampuen, Brou, Kreung, Kavet and Phnong people	Central Indochina dry forests	Tropical and subtropical dry broadleaf forests	U
213.a	U	Nicaragua	Communities of Escalante, Abejonal, La Chota, Papalon, La Palma, La Poma, Las Lajitas, Vercruz, La Pinuela and Aguas Calientes in the Rio Escalante-Chacocente Wildlife Refuge and its buffer zone	R	11.595	-86.15	Mestizo people who practice agriculture and hunting for subsistence. The main crops are maize, sorghum and beans. Rice and manioc are also grown by some people. Forest products are also important to local livelihoods	Central American dry forests	Tropical and subtropical dry broadleaf forests	Over the past 15 years, the Ministry of Natural Resources (MARENA) has been enforcing rules about not felling mature forest for agriculture. Another rule is that agricultural burns should take place in the afternoon
214.a	2006-2008	Mexico	Communities of Corazón del Valle and Valle de Corzo in La Sepultura Biosphere Reserve, Chiapas	V23	16.39	-93.999	Farmers practising subsistence milpa agriculture (primary crops corn and beans), cattle rearing, and regulated timber extraction from the biosphere reserve. Some community members also commute weekly to the city of Tuxtla Gutiérrez for work. Reserve regulations at La Sepultura allow cutting only dead trees and do not allow commercial sale of timber or timber products from the reserve. Soon after …	Central American pine-oak forests; Southern Pacific dry forests	Tropical and subtropical coniferous forests; Tropical and subtropical dry broadleaf forests	La Sepultura is administered by CONANP (Comisión Nacional de Áreas Naturales Protegidas). The Reserve has a 'core zone' where land use is restricted to preservation, and a series of buffer zones accomodating increasing levels of human activity. Reserve regulations at La Sepultura allow cutting only dead trees and do not allow commercial sale of timber or timber products from the reserve. Soon aft…
215.a	2010-2013	Belize	Village of Santa Cruz, Toledo District	V1	16.236	-89.076	Mopan and Q'eqchi Maya people practising milpa swidden agriculture of maize, with rice, beans, squash, yams, cassava, cilantro, cacao, citruses, coconut, and many more fruit tree species that they attend to in either their agricultural plots or in patches of the forest. There are two planting seasons- the milpa, planted around June, and the matahambre, planted around November	Petén-Veracruz moist forests	Tropical and subtropical moist broadleaf forests	U
216.a	2007	Belize	Villages of Blue Creek, Jordan and Aguacate, Toledo District	V23	16.184	-89.061	Q'eqchi and Mopan Maya people, practising swidden milpa agriculture. Corn is the primary crop, planted twice each year (milpa corn planted at the end of the dry season, and matahambre corn planted at the end of the wet season). Households are highly variable in the extent to which their livelihoods are diversified. Swidden agriculture is often supplemented by wage labour. Most households alos kee…	Petén-Veracruz moist forests	Tropical and subtropical moist broadleaf forests	There have been various development projects in the region in recent decades through international aid organisations and/or the Ministry of Agriculture, aimed at encouraging farmers to abandon swidden agriculture for more sedentary intensive production of citrus, rice or cacao
217.a	1995-1997	Belize	Villages of San Antonio and San José, Toledo District	V23	16.249	-89.057	Mopan Maya people	Petén-Veracruz moist forests	Tropical and subtropical moist broadleaf forests	Mopan settlements are located on Government land. Although the Mopan use lands within these systems largely without restriction, most never acquire title. In order to get a secure lease which can lead to title, the land must be surveyed and the Mopan must pay an administrative fee. The costs of survey and administrative fees can total around $200 U.S., an expense beyond the financial grasp of mos…
218.a	2000-2002	Mexico	Communal grasslands of the Milpa Alta Municipality, Distrito Federal, and San Juan Tlacotenco Municipality, Morales	R	19.12	-99.067	Many comuneros practice agricultura de traspatio, which consists in growing basic crops such as corn and diverse beans in small parcels in the back of their houses. This activity is oriented toward local consumption and can include the production of domestic animaIs, usually hens and pigs. Commercial agriculture has expanded in the last 30 years, mainly of nopales, forage plants and potatoes. In …	Trans-Mexican Volcanic Belt pine-oak forests	Tropical and subtropical coniferous forests	Two protected areas have been established on some of the Milpa Alta and San Juan Tlacotenco lands- the Biological Corridor Chichinautzin (Diario Oficial, 1988) and the National Park El Tepozteco (Diario Oficial, 1937). The local environmental agency (CORENA) sometimes conducts prescribed fires to create firebreaks to protect forest patches. Both CORENA and SEMARNAT, the official environmental age…
219.a	1996-1998	UK	Coigach and Assynt areas of Northwest Scotland	R	58.128	-5.194	Crofters and landowners, practising extensive hill sheep raising	North Atlantic moist mixed forests	Temperate broadleaf and mixed forests	Burning in Scotland is subject to legislation which forms the basis of the Muirburn Code, which sets out the legal requirements for burning as well as suggestions for using fire in different habitats. The main legal requirement is that burning is done (on land below 450 m) within the period 1st October to the 15th April, although it can be carried out with the landowner's permission until the end…
220.a	1992-1993	Australia	Mamukala outstation and the South Alligator, Wildman, West Alligator and East Alligator floodplain systems, Kakadu National Park, Arnhem land, Northern Territory	V1	-12.657	132.576	Aboriginal people, principally speaking Gungjeihmi and Gunwinggu languages	Arnhem Land tropical savanna	Tropical and subtropical grasslands, savannas, and shrublands	Kakadu was designated in 1972 as a Wildlife Sanctuary, and became a national park in 1979. It was granted World Heritage status in 1987. Aboriginal people have traditional land rights over the area, but it is leased for 100 years by the Aboriginal owners to the Australian National Parks and Wildife Agency. The Kakadu park rangers conduct fire management, in part influenced by Aboriginal burning p…
221.a	2014-2015	Namibia	Bwabwata National Park	R	-18.102	21.579	Khwe (San) people- former hunter-gatherers, and Bantu-speaking Mbukushu people- agriculturalists and pastoralists, both living within the National Park. For the Khwe, the basis of their sustenance in the park rests on the hunting of small animals, small-scale cultivation, limited livestock rearing, government food-aid, and veld food harvesting. Despite making up only 16% of the Park's population,…	Zambezian Baikiaea woodlands; Zambezian flooded grasslands	Tropical and subtropical grasslands, savannas, and shrublands; Flooded grasslands and savannas	The Khwe have been marginalised by colonial and independent governments since the C19th. The area has undergone various conservation designations (starting in 1963), as well as periods of cross-border war and resettlement of local people since the 1960s.The National Park has community inhabited multiple use areas and conservation core park areas. Namibia has been subject to Eurocentric forestry p…
222.a	U	Ethiopia	Gudeya Billa District, (9o 20′ − 9o 25’ N and 36o 35′ − 37o 05′ E)	R	9.319	36.8	Communities traditionally practising swidden agriculture of maize and sorghum, but transitioning to monocropping of teff, maize or sorghum, using chemical inputs and oxen ploughing.	Ethiopian montane forests; Ethiopian montane grasslands and woodlands	Tropical and subtropical moist broadleaf forests; Montane grasslands and shrublands	Government extension workers have promoted conversion from swidden agriculture to monocropping
223.a	2003-2010	Brazil	Jalapao region, Tocatins State	R	-10.263	-46.778	Golden-grass handicrafts are a major source of income to local communities in the Jalapao region. Communities also practice swidden agriculture and cattle production	Cerrado	Tropical and subtropical grasslands, savannas, and shrublands	U
224.a	2001	Malawi	Villages of Chole (Mulanje district), Phunduma (Phalombe district) and Songwe, on the borders of the Mulanje Mountain Forest Reserve	V23	-15.914	35.626	On the north-eastern slopes (Chole and Phunduma), due to the land available to rent, people generally have more land available to cultivate, but there are few opportunities for wage labour. On the southern slopes (Songwe) there is seasonal wage labour in tea plantations, but many residents lack the land to grow enough food to meet basic nutritional requirements and have nowhere to expand other th…	South Malawi montane forest-grassland mosaic	Montane grasslands and shrublands	The Forest Reserve was est, in 1927. In 1995 the Mulanje Mountain Conservation Trust was established, with international agency funding, to manage the reserve. The Reserve was granted UNESCO Biosphere Reserve status in 2001. People tend not to be concerned about following fire regulations because most of the damage affects forestry department land from which they are politically excluded (no more…
225.a	2016	Uruguay	Quebrada de los Cuervos Protected Landscape and surrounding areas (see map in paper)	R	-32.98	-54.391	Livestock production is the main activity	Uruguayan savanna	Tropical and subtropical grasslands, savannas, and shrublands	Field burns are allowed in some areas between autumn and spring, with the endorsement of the Sistema Nacional de Áreas Protegidas authorities
226.a	1996	Indonesia	Danau Sentarum National Park, upper Kapuas Lake region, West Kalimantan	V45	0.852	112.113	Most people in the area are Malay people, whose main activity is fishing, and around 10% of the population are Dayak people, whose main activities are fishing, collecting and selling forest products, hunting and some agriculture	Borneo peat swamp forests; Southwest Borneo freshwater swamp forests; Borneo lowland rain forests; Sundaland heath forests	Tropical and subtropical moist broadleaf forests	U
227.a	2003	Botswana	Gomoti River region in the eastern Okavango Delta (see map)	R	-19.109	22.97	Local livelihoods centre around fishing, hunting, collecting and flood-recession agriculture. Most people in the area are BaYei people	Zambezian flooded grasslands; Zambezian and Mopane woodlands	Flooded grasslands and savannas; Tropical and subtropical grasslands, savannas, and shrublands	Since the early 1900s, there have been Government projects to alter the flow of the rivers in the Okavango. Since the 1960s there has been severe limitation imposed on local use of the middle and upper Gomoti river and its feeder channels. These limitations came about through the first hunting laws in the 1950s, establishment of the Moremi Game Reserve in the 1960s, and various conservation laws …
228.a	U	Botswana	Focal villages of Samochima, Sekondomboro, Nxamasere and Megotho in the panhandle region of the Okavango Delta (the area reaching from the Namibian border in the northwest to a point some 2.5 kilometers southeast of the village of Seronga – a total straight-line distance of approximately 92 km.)	V45	-18.569	22.119	Mostly Hambukushu people, but also some Bayei, Bugakhwe, Xanikhwe San, Bakgalagadi, Batawana and Ovaherero people. There are very few wage employment opportunities in the study area, and most households receive cash in the form of remittances from absent household members. Cattle rearing is an important livelihood activity, as is fishing, and collection of natural resources, including reeds and l…	Zambezian flooded grasslands	Flooded grasslands and savannas	The colonial government introduced laws against fires by the 1930s, and after independence, the Herbage Preservation (Prevention of Fires) Act of 1978 criminalised fire use. Hunting is illegal within the panhandle. Instead of stopping burning, the laws have simply made the practice secret.
229.a	1994-1995, 1999	China	5 villages in Meihuashan nature reserve, 3 in Lonxishan nature reserve and 5 in Wuyishan nature reserve, Western Fujian	R	26.507	117.412	The people of Meihuashan and Longxishan are Han Chinese of the Hakka minority. The people of Wuyishan are Han speakers of the Jiangxi (Can) and Northern Miti dialects. The economic mainstay of Meihuashan and Longxishan villages has for centuries been mao bamboo (Phyllosiachys pubesccns Mazel ex H. De Lahaie var. pubescens), and until the 1980s, the region was renowned for the quality of its bambo…	Jian Nan subtropical evergreen forests	Tropical and subtropical moist broadleaf forests	When the Communist Party rose to power in 1949, authorities within the new regime moved rapidly to prohibit all mountain burning. By the early 1950s prefectural forestry authorities were drawing up yearly reforestation plans, establishing reforestation zones, "mobilizing the masses" in reforestation efforts, administering an aerial broadcast program to grow pines in rugged mountain zones, and pro…
230.a	2007	Madagascar	Town of Anororo, on the west coast of Lac Alaotra	V1	-17.517	48.43	Rice cultivation and fishing are the mainstay of local livelihoods, though vegetable growing, livestock rearing and textile manufacture are also practiced.	Madagascar subhumid forests	Tropical and subtropical moist broadleaf forests	An education and awareness campaign was initiated in lakeside communities in 1996 in an attempt to prevent the complete loss of the wetland habitat. In 2003 Lac Alaotra was designated a Ramsar site to provide a framework for protecting the remaining wetland. More recently the government of Madagascar classified the lake as a protected area. Burning of vegetation is banned.
231.a	U	The Gambia	32 villages across 3 of the 5 divisions of The Gambia (the Western Division, Central River Division and Upper River Division)	R	13.618	-15.289	Mandinka, Fula and Wolof people, as well as immigrants from elsewhere in Africa, particularly Senegal and Sierra Leone. Farming is the main livelihood activity	West Sudanian savanna; Guinean forest-savanna mosaic	Tropical and subtropical grasslands, savannas, and shrublands	In 1980 charcoal production and trade were banned, though the regulation is not fully observed. In the 1980s villagers were asked to form fire committees to increase awareness of and coordinate forest fire issues at the village level. By the second half of the 1980s, fire committees were established in most villages, but a lack of resources meant that they could not perform their expected role an…
232.a	U	India	Mizoram state	R	23.304	92.886	Mizo people. Agriculture is the main occupation and jhum shifting cultivation continues to be the predominant practice, affecting as much as 6,000 km2 or about 28 percent of the state.	Mizoram-Manipur-Kachin rain forests	Tropical and subtropical moist broadleaf forests	The central government, represented by the Ministry of Environment & Forests, provides funds to the state government to undertake fire management programmes. The activities include controlled burning, preparation of firebreaks, removal of fire hazards along roads and around plantation areas, and awareness/sensitisation programmes for fire management through meetings, seminars, poster campaigns, p…
233.a	2003-2007	Mexico	Pino Gordo in the Sierra Madre Occidental in the municipality of Guadalupe y Calvo, western Chihuahua (26deg33'53''N, 107deg1' 15'' W)	V1	26.565	-107.021	Raramuri (Tarahumara) people, combining subsistence agriculture (of corns, beans and squash), pastoralism and harvesting of plants and wildlife. Many practice annual migrations, maintaining residences in the high mountains during the summer when forage for livestock and conditions for crop production are good, and moving to sheltered canyon bottoms during the harsh winters of the highlands	Sierra Madre Occidental pine-oak forests	Tropical and subtropical coniferous forests	U
234.a	2012	Romania	Southern Transylvania	R	46.284	24.815	Rural communities keeping sheep and other livestock in wood-pastures	Carpathian montane forests; Pannonian mixed forests	Temperate coniferous forests; Temperate broadleaf and mixed forests	Pasture burning is illegal
235.a	1982-1995	Brazil	Village of Gorotirê, southern Para state.	V1	-7.623	-51.419	Kayapó people, practising swidden agriculture, hunting and gathering and fishing. Cassava is an important staple crop	Cerrado	Tropical and subtropical grasslands, savannas, and shrublands	U
236.a	1991, 1996	Canada	Kitwancool (Gitanyow), Gitwangak, and Gitanmaax	V23	55.191	-127.906	Gitxsan people	British Columbia mainland coastal forests; Northern transitional alpine forests	Temperate coniferous forests	Indigenous burning practices have been suppressed by Forestry laws. In the early 20th century, an extensive public education and propaganda campaign to reduce forest fires included indoctrination sessions for Indians. Anyone suspected of deliberately setting fires was subject to criminal prosecution, and several convictions were obtained. The Forest Service offered rewards for information on ince…
236.b	1991, 1996	Canada	Hagwilget and Moricetown	V23	55.179	-127.408	Wet'suwet'en people	British Columbia mainland coastal forests; Northern transitional alpine forests; Fraser Plateau and Basin complex	Temperate coniferous forests	Indigenous burning practices have been suppressed by Forestry laws. In the early 20th century, an extensive public education and propaganda campaign to reduce forest fires included indoctrination sessions for Indians. Anyone suspected of deliberately setting fires was subject to criminal prosecution, and several convictions were obtained. The Forest Service offered rewards for information on ince…
237.a	1998-1999	Fiji	Tikinas (traditional culture areas or districts corresponding to patrilineal clans of the same name) of Nasikawa, Noikoro and Navatusila in the Navosa watershed region, Viti Levu (see map)	V23	-17.839	177.835	Nasikawa, Noikoro and Navatusila yauvsas (patrilineal clans)- indigenous people practising mixed swidden and permanent subsistence and market agriculture. The typical crops are cassava (tavioka), kava (yaqona) and yams. Cattle, goat and horse are also reared, and gathering, fishing and hunting, are prevalent.	Fiji tropical dry forests; Fiji tropical moist forests	Tropical and subtropical dry broadleaf forests; Tropical and subtropical moist broadleaf forests	The first colonial legislation to regulate Indigenous burning was enacted in 1878, which commanded that a firebreak 'two fathoms wide' (3.6 m) should be cleared around a place intended for burning, and three days notice given to the turaga-ni-koro (village headman), who would arrange for an inspection and subsequent permission and supervision for the fire. Severe penalities were given for breakin…
238.a	U	China	Wenyime natural village in Dayao county, Chuxiong Yi Autonomous Prefecture, Yunnan Province	V1	25.894	100.977	Han and Yi people. The main crops grown are maize, rice, broad bean. Tobacco is the main cash crop. People also keep cattle, mules, horses and pigs	Yunnan Plateau subtropical evergreen forests	Tropical and subtropical moist broadleaf forests	Since the 1987 forest fire in Daxinganling, each level of government has strengthened its leadership on forest fire management and adopted more effective measures, which have led to reductions in forest fires. These included the establishment of Forest fire management command and administrative bodies at the provincial, prefecture and county levels, new Forest Fire Management Regulations (incl on…
239.a	U	Laos	Two villages on the perimeter of Xe Bang Nouan National Biodiversity Conservation Area, Salavan Province	V23	15.847	105.92	Villagers	Southeastern Indochina dry evergreen forests	Tropical and subtropical dry broadleaf forests	Impetus for Government policies around fire come both from economic concerns (mainly conserving timber resources) and via international development aid. Burning is forbidden in protected areas (Prime Minister Decree 154 of 1993). Recent legislation gives local people forest rights Decree 169 of 1993 and ORder 54 of 1996), but limits the areas where shifting cultivation is permitted. The Forestry …
239.b	U	Laos	60 villlages in 5 districts of Sayabouri Province	R	18.882	101.523	Villagers	Luang Prabang montane rain forests; Northern Indochina subtropical forests	Tropical and subtropical moist broadleaf forests	Impetus for Government policies around fire come both from economic concerns (mainly conserving timber resources) and via international development aid. Burning is forbidden in protected areas (Prime Minister Decree 154 of 1993). Recent legislation gives local people forest rights Decree 169 of 1993 and ORder 54 of 1996), but limits the areas where shifting cultivation is permitted. The Forestry …
240.a	U	India	Districts of Bolangir, Sambalpur and Deogarh, State of Orissa	R	21.137	84.094	A substantial part of livelihoods is obtained from trade of non-timber forest products, especially mahua (Madhuca indica) flowers and kendu (Diospyros melanoxylon) leaves.	Eastern highlands moist deciduous forests; Northern dry deciduous forests	Tropical and subtropical moist broadleaf forests; Tropical and subtropical dry broadleaf forests	The state allocates meagre resources to the management of forest fires, and these resources remain at the disposal of the Forestry Department. The State of Orissa Forest Act (1972) prohibits uncontrolled burning in forests, and all burning in forest reserves.
241.a	U	Zambia	4 village clusters in Lwitikila, Munikashi, Mono and Kanchibiya sub-areas of Senior Chief Kopa's area, Mpika District (latitude, 11° 00'–13° 30' South; longitude, 29° 45'–32° 30' East, Northern Zambia	V45	-12.25	31.25	Bisa people. Subsistence farming (cassava, millet, sweet potatoes, maize), hunting and caterpillar collection (of 8 different species of caterpillar) are the major sources of livelihood	Central Zambezian Miombo woodlands	Tropical and subtropical grasslands, savannas, and shrublands	U
242.a	U	France	Western French Pyrenees	R	43.107	-1.044	Pastoralists	Cantabrian mixed forests; Pyrenees conifer and mixed forests	Temperate broadleaf and mixed forests	In the 19th century, new agricultural standards and knowledge influenced State fire policy, opposing traditional fire use. Fire was increasingly regulated. The State now recognises the logic of prescribed burning, including it in the forest law of 2001, although the tendency has been towards high technical standards for prescribed fire by agencies, rather than the inclusion of traditional fire us…
243.a	1996	USA	Birch Creek Village, Gwitch'in Territory, also in the Yukon Flats National Wildfire Refuge, Alaska	V1	66.259	-145.865	Gwich'in people. Because of limited wage-earning opportunities and a general preference for wild foods, wild game and fish remain integral to the social, cultural, and economic well-being of community members.	Interior Alaska-Yukon lowland taiga	Boreal forests/taiga	From the 1930s, Alaska had a large fire suppression program, which greatly reduced the incidence of wildfires. In the 1980s the state began to adopt fire management approaches.	One paper also discusses the Koyukon people in the western Interior, who do not have a tradition of fire use
244.a	2011	Guyana	Villages of Shizizi, Potarinao, Sawari wa''o, Shurinab and Parikwarinao, South Rupununi Region	V45	2.972	-59.818	Wapichan people, and a small number of Makushi people, who live intermixed with the Wapichan. Over the last 50 years, an increasing number of communities and households have taken up cattle-raising, and more recently commercial peanut farming, as an alternative to the traditional subsistence activities of small-scale farming, hunting, fishing and gathering. Forests are used for agriculture, hunti…	Guianan savanna	Tropical and subtropical grasslands, savannas, and shrublands	Outside pressure to reduce or control fire use has increased with the work of US organisation Conservation International in the area, since 1993. Community leaders are increasingly being invited to form part of national and international meetings to define national strategies for environmental conservation in Guyana, in which fire is posed as one of the principal environmental threats.
245.a	U	Spain	As Nogais municipality, Galicia	V1	42.81	-7.109	Rural peasants	Cantabrian mixed forests	Temperate broadleaf and mixed forests	During much of the 20th century, the Spanish state pursued the transformation of Spain’s, and Galicia’s, rural society according to two strategic goals. On the one hand, the state sought to increase the productivity of the rural sector through the modernisation of its technological and productive structures. On the other hand, the state also sought to reduce the number of peasants living in rural…	Galicia accounts for a very high proportion of Spain's wildfires
246.a	U	China	12 Tibetan villages (28°20'8.5"–28°39'9.5" N, 98°44'43.6"−99°06'54.8" E) within the Three-Parallel-Rivers World Heritage Site, Deqin County, Yunnan Province	R	28.5	98.917	agro-pastoralists. Traditionally, local farmers depended on agropastoral transhumance—a combination of activities at different elevations—for a basic livelihood, relying heavily on forest resources and on livestock to maintain a highly self-sufficient economy with little exchange with the outside world. However, since the early 1980s, economic restructuring driven by market demand, government pro…	Nujiang Langcang Gorge alpine conifer and mixed forests	Temperate coniferous forests	Since the 1980s the Government has pursued economic policies that have encouraged more intensive agriculture, and reforestation, at the expense of traditional agro-pastoral livelihoods. Pastoral fire use has been criminalised.
247.a	U	Namibia	Northeastern Namibia	R	-20.082	18.594	Owambo agro-pastoralists engaging mostly in livestock husbandry and some cultivation. Cattle and goats are grazed on communal pastures	U	U	U
248.a	2001	Ethiopia	20 villages that were selected from five peasant associations, Did Yabello, Moyatte, Did Harra, Dubuluk and Melbana, in the Borana rangelands	R	4.5	38.329	Borana pastoralists, relying on livestock and most also on crop farming (maize, haricot, sorghum and wheat in particular). The average livestock holding per household was 14 cattle, 10 goats, 6 sheep and 2 camels.	Somali Acacia-Commiphora bushlands and thickets	Tropical and subtropical grasslands, savannas, and shrublands	Fire use in rangelands is banned
249.a	2005	Australia	Communities of Nyirripi, Yuendumu and Willowra, Southern Tanami Desert, Northern Territory	V23	-22.012	131.674	Warlpiri people.	Great Sandy-Tanami desert; Central Ranges xeric scrub	Deserts and xeric shrublands	Indigenous burning practices were increasingly constrained during the colonial period, as the colonial frontier expanded, and the establishment of cattle stations and government policies led to increasing sedentarization. During the period from the 1930s until the 1970s many Warlpiri moved to large government-run settlements. During the late 1960s and 1970s profound changes occurred in Aboriginal…
250.a	U	Thailand	Ban Huai Yuak settlement, Ban Luang District, Nan Province	V1	18.857	100.518	Mlabri people, who lived as nomadic hunter-gatherers moving in kinship groups through the forest and staying at a new location every few years ago, until 20 years ago when they started to begin to live sedentary lives and engage in cash cropping, ethnic tourism and wage labour. They still engage in hunting and gathering in the forest and maintain traditional dietary habits. The staple of the Mlab…	Northern Thailand-Laos moist deciduous forests	Tropical and subtropical moist broadleaf forests	There were almost no eye-witness written accounts of the Mlabri before the end of the 1910s. State-led development projects have encouraged the Mlabri to transition from hunter-gatherer lifestyles to tourism, wage labour, cash cropping and sedentary lifestyles
251.a	1992-1996	Malaysia	Nanga Sumpa, upper Batang Ai watershed, Lubok Antu District, Sri Aman Division, Sarawak (hilly interior), Borneo	V1	1.203	112.057	Iban people, who traditionally practised swidden agriculture involving moving settlements, but who today are almost completely sedentary. Most households still practice swidden agriculture of upland rice but this is increasingly combined with cash cropping of rubber and other crops. Wild plants are also an important part of diets	Borneo lowland rain forests	Tropical and subtropical moist broadleaf forests	Government schemes have provided households with support for permanent cash cropping, including providing rubber seedlings, and subsidies for cacao or red pepper production
251.b	1995-1996	Malaysia	Marup Baroh, Lower Batang Ai watershed, Lubok Antu District, Sri Aman Division, Sarawak (coastal area), Borneo	V1	1.137	111.651	Iban people, who traditionally practised swidden agriculture involving moving settlements, but who today are almost completely sedentary. In Marup Baroh upland rice swidden agriculture has to a large extent been replaced by semi-permanent cultivation of wet rice, and cash cropping. Still, more than 80% of the households farm small patches of upland rice despite the importance of wet rice cultivat…	Borneo lowland rain forests	Tropical and subtropical moist broadleaf forests	Government schemes have provided households with subsidies for permanent cash cropping, especially red pepper production.
252.a	U	Malaysia	Villages of Kg. Babagon, Kg. Notorus, Kg. Kibunut, Kg. Moyog, Kg. Tagudon and Kg. Tudan Ulu, Moyog constituency, Sabah	R	5.902	116.206	Dusun people. Traditional hill rice swidden agriculture is transitioning to permanent cash cropping and off-farm employment	Borneo lowland rain forests	Tropical and subtropical moist broadleaf forests	Colonial measures which tended to confine shifting cultivation into hilly and remote areas of poor soils, putting pressure on potentially unstable easily degraded terrain have been reflected in post- independence Malaysian policies aimed at ending shifting cultivation and encouraging permanent cash crop farming
253.a	1995	Mexico	Communities of Sotuta, Cholul, Chumayel, Tahdzibichen, Tixcacaltuyub, Cantamayec and Mayapan, Yucatan State	R	20.715	-89.142	Yucatec Maya people, predominantly practising milpa swidden agriculture, and some households cultivating citrus, keeping bees or cattle. Many households have members conducting salaried work in the cities	Yucatán dry forests	Tropical and subtropical dry broadleaf forests	Government policies have encouraged commercial over subsistence agriculture. In 1994 constitutional land tenure laws (Article 27 of the Mexican Constitution) were changed by the Mexican congress in order to "modernize" agricultural production and substitute maize for higher value crops. In Yucatan, horticulture and citrus cultivation have been consistently promoted
254.a	U	Tanzania	Villages of Motomoto, Imalamakoye, Kasungu and Mtakuja, Urambo District	V45	-5.124	32.068	Subsistence swidden agriculture of maize, beans and groundnuts is combined with tobacco cashcropping, which is also done as shifting agriculture	Central Zambezian Miombo woodlands	Tropical and subtropical grasslands, savannas, and shrublands	U
255.a	1994, 2001	Zambia	Mpika District, Northern Province	R	-12.029	31.313	Bemba people, traditionally practising a form of swidden agriculture called chitemene. Today, millet, produced by chitemene agriculture, is an important cash crop.	Central Zambezian Miombo woodlands	Tropical and subtropical grasslands, savannas, and shrublands	Structural adjustment policies by the Government in the early 1990s meant that peasants no longer received support by means of fixed pricing of maize or government loans, which resulted in the rapid decline of maize production using chemical fertilizers, and a relience on chitemene to grow millet as a cash crop
256.a	1993-1994	Zambia	Mulenga-Kapuli Village (11° 40'S, 31°10'E). located 27 km west of Mpika town, Northern Province	V1	-11.667	31.167	Bemba people, traditionally practising a form of swidden agriculture called citemene	Central Zambezian Miombo woodlands	Tropical and subtropical grasslands, savannas, and shrublands	U
257.a	2000-2003	Mexico	X-Maben ejido, Felipe Carrillo Puerto Municipality, Quintana Roo	V1	19.808	-88.175	Maya farmers. Economic activities involve subsistence agriculture, honey production, extracting timber and chicle (latex of Manilkara zapota-Sapotaceae). Additionally, some people are temporarily employed in the tourist zone of Cancun, Playa del Carmen and Tulum, now called the Riviera Maya	Yucatán moist forests	Tropical and subtropical moist broadleaf forests	U
258.a	1999-2000	Venezuela	Gavilán, Cataniapo river, Amazonas State	V1	5.544	-67.391	Piaroa people, practising swidden agriculture of maize, cassava, and other crops, and using fallow areas for hunting and collection of wild species. Some crops and wild species are sold at market in Puerto Ayacucho	Guianan piedmont and lowland moist forests	Tropical and subtropical moist broadleaf forests	Since the 1980s there have been numerous government agricultural development projects in Gavilan, to encourage monocropped, input-based agriculture.
259.a	1999-2001	Brazil	Sao Manoel, Lago do Junco municipality, Maranhao State	V1	-4.5	-44.9	Peasants integrating swidden agriculture of annual crops (rice, maize, manioc, beans), extraction of babassu palm products which are sold, and pastures for cattle ranching. These people are 'caboclos' - of mixed indigenous and European descent. A rural elite of less than 40 landholders (with areas greater than 200 ha) control half of the land	Maranhão Babaçu forests	Tropical and subtropical moist broadleaf forests	U
260.a	U	Bangladesh	13 villages in the Sub-districts of Bandarban Sadar and Alikadam, Bandarban district, Chittagong Hill Tracts	R	21.826	92.231	There are 11 hill tribes as well as Bengalese people in the district. Marma and Mro are the main tribal communities. Land-use systems such as agroforestry, commercial plantation and horticulture have evolved in areas where support and facilities were favorable. While in other areas with insecure land tenure, difficult access to market centers, and unavailability of credit and extension services, …	Lower Gangetic Plains moist deciduous forests	Tropical and subtropical moist broadleaf forests	Efforts have been made to control shifting cultivation and promote alternative land-use systems since 1860. In some villages training programs and financial support have been available to encourage more intensive agriculture. In large parts of the area, shifting cultivators’ customary rights to land have been abolished through nationalization of forest lands. Swidden still remains the dominant la…
261.a	1987-2003	Ethiopia	Yabello District, Borana Rangelands	R	4.894	38.087	Borana pastoralists, traditionally depending mostly on livestock production, but increasingly also crop cultivation.	Somali Acacia-Commiphora bushlands and thickets	Tropical and subtropical grasslands, savannas, and shrublands	Fire use in rangelands has been banned since the 1970s.
262.a	2007	Cambodia	Krala village, Poey Commune, Ou Chum District, Ratanakiri Province	V1	13.804	107.008	Kreung people. Upland rice swidden cultivation is an important part of livelihoods, with secondary crops like tubers, corn and vegetables. Wild fruits and vegetables are harvested from fallow plot. Cashews are increasingly planted as a cash crop and are the primary source of cash income. Cashews are intercropped with upland rice for 3 years until the trees mature and become productive.	Southeastern Indochina dry evergreen forests	Tropical and subtropical dry broadleaf forests	During the Khmer Rouge regime many highland communities were forcibly relocated to lowland areas to grow lowland paddy rice. After the fall of the regime, many returned to their original villages. Driving forces of agrarian change include national policies to liberalize trade and markets, and high market prices for rubber and cashews. In recent decades, the national government has begun to exert …
262.b	2007	Cambodia	Leu Keun village, Ke Chong Commune, Bar Kaev District, Ratanakiri Province	V1	13.756	107.247	Jarai people. Upland rice swidden cultivation is an important part of livelihoods, with secondary crops like tubers, corn and vegetables. Wild fruits and vegetables are harvested from fallow plots. Permanent paddy rice, or cash crop cultivation is increasingly practiced, especially of cashews, which are the primary source of cash income. Cashews are intercropped with upland rice for 3 years until…	Southeastern Indochina dry evergreen forests	Tropical and subtropical dry broadleaf forests	During the Khmer Rouge regime many highland communities were forcibly relocated to lowland areas to grow lowland paddy rice. After the fall of the regime, many returned to their original villages. Driving forces of agrarian change include national policies to liberalize trade and markets, and high market prices for rubber and cashews. In recent decades, the national government has begun to exert …
262.c	2007	Cambodia	Tuy village, Ting Chac Commune, Bar Kaev District, Ratanakiri Province	V1	13.728	107.105	Tampouen people. Upland rice swidden cultivation is an important part of livelihoods, with secondary crops like tubers, corn and vegetables. Wild fruits and vegetables are harvested from fallow plots. Permanent paddy rice, or cash crop cultivation is increasingly practiced, especially of cashews which are the primary source of cash income. Cashews are intercropped with upland rice for 3 years unt…	Southeastern Indochina dry evergreen forests	Tropical and subtropical dry broadleaf forests	During the Khmer Rouge regime many highland communities were forcibly relocated to lowland areas to grow lowland paddy rice. After the fall of the regime, many returned to their original villages. Driving forces of agrarian change include national policies to liberalize trade and markets, and high market prices for rubber and cashews. In recent decades, the national government has begun to exert …
263.a	U	Laos	Nampheng village, Oudomxay province (20°58′48″ N; 101°40′48″ E) and Nahom village, Oudomxay Province (20°59′4″ N; 101°40′12″ E)	V23	20.982	101.675	Khmu and Hmong people. Upland swidden rice and to a much lesser extent permanent paddy rice cultivation (irrigated and rainfed) are the main agricultural strategies, and cash crops like watermelons, maize, and other vegetables, as well as rubber, and non-timber forest products like bamboo and rattan, are sold.	Northern Indochina subtropical forests	Tropical and subtropical moist broadleaf forests	Until the 1990s, when village resource boundaries were delineated under the Land and Forest Allocation Policy (LFA), there was no restriction on areas of swidden cultivation. After the LFA, households were limited to 3 swidden plots, and large tracts of fallowed land were incorporated into forestland, where conversion to non-forestland is prohibited.
264.a	2018	India	Villages of Bukvannei, Dapchhuah, Lunzarhtum, N. Mualthuam, Nazawl, Neihdawn, Pehlawn, R. Vanhne, Siachangkawn, Sialhau, Sialsir, Theiri, Thiak, Thiltlang, Tualcheng and Zanlawn in Mizoram state	R	23.339	93.001	Jhumias- rural people practising swidden agriculture (jhum), and livestock farming. Some work in village level small-scale handicraft industry. Crops grown under swidden are rice, ginger, chili, mustrard, pumpkin, aubergine, maize and cabbage.	Mizoram-Manipur-Kachin rain forests	Tropical and subtropical moist broadleaf forests	U
265.a	U	India	Pomlakrai-Mawbynna village, Meghalaya State	V1	25.524	91.865	Farmers practising swidden agriculture	Meghalaya subtropical forests	Tropical and subtropical moist broadleaf forests	U
266.a	2015	India	Hilly catchment near Shillong in Meghalaya State	V23	25.501	91.907	Farmers practising semi-permanent swidden agriculture	Meghalaya subtropical forests	Tropical and subtropical moist broadleaf forests	U
267.a	2014-2015	Indonesia	Gunung Madu village (pseudonym), Berau District, East Kalimantan Province, Borneo	V1	1.507	117.267	Dayak Lebbo people, practising swidden agriculture (ladang) of upland rice, intercropped with other crops. Often fruit trees and hardwoods are tended in the fallows. Other livelihoods include harvesting edible birds nests for sale, honey collection and smallholder rubber plantation. The landscape is undergoing conversion for plantations and mining.	Borneo lowland rain forests	Tropical and subtropical moist broadleaf forests	After the second world war, the Indonesian state asserted control over the national 'forest estate'- especially from the 1970s onwards under the Suharto government, the Indonesian state sought to assert more direct control over Kalimantan territory through commercial logging and through ‘development’ schemes, which were facilitated by the relocation and sedentarization of indigenous groups and st…
267.b	2014-2015	Indonesia	Long Kelay village (pseudonym), Berau District, East Kalimantan Province, Borneo	V1	1.907	116.821	Dayak Punan people, primarily practising swidden agriculture (ladang) of upland rice, intercropped with other crops. Often fruit trees and hardwoods are tended in the fallows. Until recently, these people were semi-nomadic and relied heavily on hunting and gathering. There are a number of timber concessions in the area. The most common secondary livelihood source is artisanal gold mining	Borneo lowland rain forests	Tropical and subtropical moist broadleaf forests	After the second world war, the Indonesian state asserted control over the national 'forest estate'- especially from the 1970s onwards under the Suharto government, the Indonesian state sought to assert more direct control over Kalimantan territory through commercial logging and through ‘development’ schemes, which were facilitated by the relocation and sedentarization of indigenous groups and st…
268.a	2008	Zambia	A village (unnamed in the paper) in Eastern Province, Zambia (14°08'S, 31°43'E)	V1	-14.133	31.717	People practising swidden agriculture	Southern Miombo woodlands	Tropical and subtropical grasslands, savannas, and shrublands	U
269.a	2012	Sri Lanka	50 villages across the Divisions of Thanamalwila, Sevanagala, Buttala, Katharagama and Siyambalanduwa in the Monaragala District	R	6.67	81.3	People practising semi-permanent agriculture characterised by very short fallow periods, mostly mono cropping of maize (for which there is a well established commercial market) and high input use.	Sri Lanka dry-zone dry evergreen forests	Tropical and subtropical dry broadleaf forests	Cultivation on government land without permission is currently prohibited (Forest Conservation Act of Sri Lanka, 2008), though it continues in practice. Forest Department records show that the average fine for semi-permanent/ shifting cultivation is around Rs. 10,000 and the maximum fine is Rs. 200,000. However, few legal actions are taken, partly because there is an understanding that poor landl…	P. 2 has a map of the intensity of swidden agriculture across Sri Lanka (incl outside the study area), which shows that swidden agriculture is most commonly practiced in Sri Lanka's dry zone. (It is unclear why this paper refers to this agriculture as swidden/ shifting agriculture, as most farmers use the same plot of land each year)
270.a	1999; 2011	Papua New Guinea	A village (unnamed in the paper) approx 60km south-southeast from the city of Lae	V1	-7.417	147.153	Swidden agriculture is the primary basus of livelihoods, as well as animal husbandry, hunting, forest product gathering and marine fishing and resource gathering. Crops include sago palm, root crops (cassava, taro, sweet potato, yam), fruit trees (betel nut, mango, coconut, banana, papaya), melons, pineapple, cucumbers, sugar cane, pit-pit (wild cane), and leafy greens	Southeastern Papuan rain forests	Tropical and subtropical moist broadleaf forests	U	Approx 85% of the population of Papua New Guinea relies on swidden agriculture
271.a	U	Ghana	Atwima Nwabiagya District (Longitudes 1° 40′ and 2° 23′ W, and Latitude 6° 75′ N.) of the Ashanti Region	R	6.608	-1.582	Smallholder farmers practising semi-permanent and permanent agriculture- mostly Akan speaking people but also some migrants from other districts in the region, and from neighbouring regions.	Eastern Guinean forests	Tropical and subtropical moist broadleaf forests	U
272.a	U	India	Hilly region of the Northeast Himalayan Region located between E 89o36´16.1719´´ N 26o22´19.8676´´ to E 97o19´0.8203´´ N28o 8´58.2116´´.	R	27.25	93	Farmers practising swidden agriculture (jhum).	U	U	U
273.a	U	Vanuatu	Villages of Avunaleleo on Malo island and Brenwe on Malekula island	V23	-16.204	167.482	Agriculture dominates the country’s economy and 98% of the rural population practice small-scale family farming. Farming systems have three components: a perennial plantation cultivation system of coconut, cacao and other crops (which constitutes the main source of cash income for families), a swidden cultivation system, and a forest and arboricultural system. Yams are the main crop in the swidde…	Vanuatu rain forests	Tropical and subtropical moist broadleaf forests	U
273.b	U	Vanuatu	Village of Pessena on Espiritu Santo island	V1	-15.3	166.918	Agriculture dominates the country’s economy and 98% of the rural population practice small-scale family farming. Farming systems have three components: a perennial plantation cultivation system of coconut, cacao and other crops (which constitutes the main source of cash income for families), a swidden cultivation system, and a forest and arboricultural system. Taro (irrigated) is the main crop in…	Vanuatu rain forests	Tropical and subtropical moist broadleaf forests	U
273.c	U	Vanuatu	Villages of Lolossori on Ambae island, Lamlu on Tanna island and Tansip on Pentecost island	V23	-15.697	168.177	Agriculture dominates the country’s economy and 98% of the rural population practice small-scale family farming. Farming systems have three components: a perennial plantation cultivation system of coconut, cacao and other crops (which constitutes the main source of cash income for families), a swidden cultivation system, and a forest and arboricultural system. Taro (rainfed) is the main crop in t…	Vanuatu rain forests	Tropical and subtropical moist broadleaf forests	U
274.a	2013	Indonesia	Linggang Melapeh, sub-district of Linggang Bigung, West Kutai Regency, East Borneo Province	V1	-0.162	115.59	Dayak Tungung people, 75% practising swidden agriculture of rice, intercropped with other foods, as well as fishing, hunting and gathering	Borneo lowland rain forests	Tropical and subtropical moist broadleaf forests	Swidden agriculture is permitted by the local government, because the Dayak Tunjung are not regarded as exploiting the forest on a large scale
275.a	U	Australia	Arhnem Land Fire Abatement project (ALFA) areas (CALFA, WALFA, NEALFA, SEALFA1 and SEALFA 2)	R	-12.914	133.335	The Arnhem Land Fire Abatement Limited, a non-profit company established to make a financial return from savanna fire management, to benefit the Aboriginal landowners of Arnhem Land. ALFA manages the Australian Carbon Credit Units that it earns, either selling them under contract to the Australian government or to corporate purchasers, or saving them for later sale. Nine Aboriginal ranger groups,…	Arnhem Land tropical savanna; Carpentaria tropical savanna; Kimberly tropical savanna	Tropical and subtropical grasslands, savannas, and shrublands	During the settler colonial period of domination when Arnhem Land was gazetted a reserve, missions and government settlements were established, and burning practices were actively discouraged by state authorities. From the 1970s, Aboriginal people were gradually granted exclusive ownership of their lands and natural resources (except sub-surface minerals) under land rights law. These new property…
276.a	U	Brazil	Xingu Indigenous Park	R	-11.247	-53.207	Several Indigenous groups including the Panará, Kisêdjê, Yudja, Kawaiwete, Ikpeng, Kuikuro and Waura	Mato Grosso seasonal forests	Tropical and subtropical moist broadleaf forests	The Park was originally proposed in 1952, reserved in 1961, and ratified by Presendential decree in 1991. The NGO Institutu Socioambiental Xingu Programme launched in 1995, developing a long-term presence in the PIX, based on projects and activities jointly planned with indigenous organizations and leadership.
277.a	2015	Guyana	Rupununi region	R	2.964	-59.778	Makushi and Wapishana people	Guianan savanna; Guianan moist forests	Tropical and subtropical grasslands, savannas, and shrublands; Tropical and subtropical moist broadleaf forests	In the past century, the recurrence of large wildfires and the damage to the vulnerable ecosystems resulted in several administrative and legal actions undertaken by governments in the region, such as the creation of Protected Areas, and the suppression of wildfires—a ‘zero fire’ (or ‘zero burning’) policy—aimed at conserving the diverse and singular landscape. The Forest Act 2009 in Guyana conta…	Venezuela case discussed in this paper is covered under case 179.a
277.b	2015	Brazil	Savannas of Roraima state	R	3.839	-60.499	Makushi and Wapishana people	Guianan savanna	Tropical and subtropical grasslands, savannas, and shrublands	In the past century, the recurrence of large wildfires and the damage to the vulnerable ecosystems resulted in several administrative and legal actions undertaken by governments in the region, such as the creation of Protected Areas, and the suppression of wildfires—a ‘zero fire’ (or ‘zero burning’) policy—aimed at conserving the diverse and singular landscape. In Brazil, the responsibility for t…	Venezuela case discussed in this paper is covered under case 179.a
278.a	2005	Brazil	Eastern part of the Parababure Indian Reserve, Mato Grosso State	V23	-14.283	-52.933	Xavante people	Cerrado	Tropical and subtropical grasslands, savannas, and shrublands	U
279.a	2008	Brazil	Serra da Lua region comprising 9 indigenous lands	R	3.253	-60.682	Wapixana people	Guianan savanna	Tropical and subtropical grasslands, savannas, and shrublands	U
280.a	2007-2010	Brazil	Irantxe, Myky, Paresi, Tirecatinga and Utiariti Indigenous lands in the Western part of Mato Grosso state	R	-13.877	-58.444	Irantxe, Myky, Paresi and Nambikwara people	Cerrado	Tropical and subtropical grasslands, savannas, and shrublands	From 2007 to 2010 a program to prevent and combat forest fires on the indigenous lands of Irantxa, Myky, Paresi, Tirecatinga and Utiariti was implemented by the Institute of Environment (IBAMA) and National Indian Foundation (FUNAI).
281.a	2015-2016	Brazil	Xerente Indigenous Lands	R	-9.579	-48.216	Xerente people	Cerrado	Tropical and subtropical grasslands, savannas, and shrublands	Brazil has traditionally adopted 'zero fire policies' aiming to elimate fire use through restrictive legislation, prevention and suppression. Programs designed to “educate” and guide indigenous people (Figures 2 and 3) about the negative effects of fire in the environment were implemented between the last decades of the 20th century and start of the 21st century. The main environmental agencies b…
281.b	2015-2017	Brazil	Araguaia Indigenous Lands	R	-11.523	-50.587	Javaé and Karajá people	Cerrado	Tropical and subtropical grasslands, savannas, and shrublands	Brazil has traditionally adopted 'zero fire policies' aiming to elimate fire use through restrictive legislation, prevention and suppression. Programs designed to “educate” and guide indigenous people (Figures 2 and 3) about the negative effects of fire in the environment were implemented between the last decades of the 20th century and start of the 21st century. The main environmental agencies b…
281.c	2015-2018	Brazil	Kraolândia Indigenous Lands	R	-8.299	-47.633	Krahô people	Cerrado	Tropical and subtropical grasslands, savannas, and shrublands	Brazil has traditionally adopted 'zero fire policies' aiming to elimate fire use through restrictive legislation, prevention and suppression. Programs designed to “educate” and guide indigenous people (Figures 2 and 3) about the negative effects of fire in the environment were implemented between the last decades of the 20th century and start of the 21st century. The main environmental agencies b…
282.a	2013-2014	Brazil	Parque do Araguaia Indigenous Lands	R	-11.523	-50.587	Javaé people	Cerrado	Tropical and subtropical grasslands, savannas, and shrublands	In 2013, Prevfogo (the National Centre for the Prevention and Fighting of Forest Fires) and IBAMA (The Brazilian Institute for the Environment and Natural Resources) set up Indigenous fire brigades in three areas of the state of Tocantins. At the end of 2013, IBAMA began a Technical Cooperation Agreement with FUNAI (the National Indian Foundation) to implement the Federal Brigades in Indigenous L…
282.b	2013-2014	Brazil	Xerente Indigenous Lands and Funil	R	-9.579	-48.216	Xerente people	Cerrado	Tropical and subtropical grasslands, savannas, and shrublands	In 2013, Prevfogo (the National Centre for the Prevention and Fighting of Forest Fires) and IBAMA (The Brazilian Institute for the Environment and Natural Resources) set up Indigenous fire brigades in three areas of the state of Tocantins. At the end of 2013, IBAMA began a Technical Cooperation Agreement with FUNAI (the National Indian Foundation) to implement the Federal Brigades in Indigenous L…
282.c	2013-2014	Brazil	Kraolândia Indigenous Lands	R	-8.299	-47.633	Krahô people	Cerrado	Tropical and subtropical grasslands, savannas, and shrublands	In 2013, Prevfogo (the National Centre for the Prevention and Fighting of Forest Fires) and IBAMA (The Brazilian Institute for the Environment and Natural Resources) set up Indigenous fire brigades in three areas of the state of Tocantins. At the end of 2013, IBAMA began a Technical Cooperation Agreement with FUNAI (the National Indian Foundation) to implement the Federal Brigades in Indigenous L…
283.a	2013-2016	Brazil	The Estação Ecológica Serra Geral do Tocantins (Serra Geral do Tocantins Ecological Station), a full protection conservation area in Jalapão, Tocantins state	V45	-10.857	-46.692	Quilombola, and other non-Indigenous peasant communities that arrived in the region approximately 120 years ago. Most agricultural activity in the area consists of subsistence swidden agriculture, extensive cattle ranching, and production and sale of objects handcrafted with golden grass (capim-dourado). There are three types of fields: Drained peat swamp swidden fields (Roça de esgoto), rainfed …	Cerrado	Tropical and subtropical grasslands, savannas, and shrublands	In the mid-1960s, the Brazilian government launched a series of programs for agricultural modernisation and the occupation of Amazonia and the Cerrado. Two federal programs specifically targeted the Cerrado: the Program for Development of the Cerrado (POLOCENTRO) and the Japanese Cooperation Program for Development of the Cerrado (PRODECER). POLOCENTRO channeled agricultural and ranching credit t…	Jalapão State Park and Chapada das Mesas cases discussed in some of the papers are under case 347
284.a	2015-2017	Brazil	Chapada das Mesas National Park	V45	-7.147	-47.144	Communities local to the protected area, practising swidden agriculture, extensive cattle raising, as well as use of natural vegetation and working in the tourism industry	Cerrado	Tropical and subtropical grasslands, savannas, and shrublands	Until recently, Brazil had a 'zero fire' policy, and most Cerrado protected area managers have tried to prevent most fires through firebreaks around and within PAs and prohibition of fire use. In 2012, federal legislation (Law 12651/2012) changed from a fire suppression focus to now explicitly allow the use of fire management for conservation purposes in both private and public protected areas wi…	Serra Geral do Tocantins Ecological Station discussed in some of the papers is under case 345
284.b	2014-2017	Brazil	Jalapão State Park	V45	-10.306	-46.773	Quilombola communities and other non-indigenous peasant communities, practising extensive cattle rearing, swidden agriculture, and creating handicrafts from golden grass. Some people also work in the tourism industry	Cerrado	Tropical and subtropical grasslands, savannas, and shrublands	Until recently, Brazil had a 'zero fire' policy, and most Cerrado protected area managers have tried to prevent most fires through firebreaks around and within PAs and prohibition of fire use. In 2012, federal legislation (Law 12651/2012) changed from a fire suppression focus to now explicitly allow the use of fire management for conservation purposes in both private and public protected areas wi…
285.a	1997-1998	Nepal	Num Village Development Committee, Sankhuwasabha district	V1	27.536	87.351	Sherpa people, with the same households often practising swidden agriculture as well as permanent rainfed or irrigated agriculture, including cardamom as a cash crop, and keeping sheep and cattle.	Eastern Himalayan broadleaf forests	Temperate broadleaf and mixed forests	In 1964 communal rights over the land were abolished by the Government, in favour of limited private ownership
286.a	2010	Nepal	Jhamrung village, Bhumlichock Village Development Committee, Gorkha District	V1	27.85	84.68	Chepang people, practising both swidden agriculture (khoriya) and permanent agriculture (small areas of unirrigated paddy rice). Fishing and collection of edible plants and animal husbandry also contribute to livelihoods.	Himalayan subtropical broadleaf forests	Tropical and subtropical moist broadleaf forests	The state declared ownership of Nepal's forests in 1957, and Chepang people lost their customary rights to land. Swidden agriculture has not been recognised in land related laws.
287.a	2006	Ethiopia	Harrena forest	R	6.597	39.29	Indigenous people	Ethiopian montane grasslands and woodlands; Ethiopian montane forests	Montane grasslands and shrublands; Tropical and subtropical moist broadleaf forests	U
288.a	U	Ethiopia	Bale Mountains national park	R	6.886	39.734	Oromo people, principally pastoralists.	Ethiopian montane moorlands; Ethiopian montane grasslands and woodlands; Ethiopian montane forests	Montane grasslands and shrublands; Tropical and subtropical moist broadleaf forests	U
289.a	2011-2014	Tanzania	Villages of Likawage (sub villages Nunjumba, Kinaki and Gogozembe) and Nainokwe (subvillage Kichonda) in Kilwa District	V45	-9.117	39.038	Rural people practising agriculture, hunting, and beekeeping	Northern Zanzibar-Inhambane coastal forest mosaic; Eastern Miombo woodlands	Tropical and subtropical moist broadleaf forests; Tropical and subtropical grasslands, savannas, and shrublands	Lighting fires for hunting is not allowed under Tanzanian law but in remote areas there is often no enforcement of the law
290.a	U	Romania	Southern part of the Transylvanian Plateau, partially overlapping with the Natura 2000 Sighişoara-Târnava Mare site of Community Importance	R	46.049	24.585	Rural villagers keeping livestock (cattle, sheep, goats, horses) in wood pastures	Pannonian mixed forests	Temperate broadleaf and mixed forests	U
291.a	2015	Ukraine	Rozhniativ District, Prykarpattya region	R	48.936	24.159	Rural pastoralists	Carpathian montane forests	Temperate coniferous forests	The legal systems responsible for nature protection, both at national and community levels, ignore the conservation needs of wood pastures as cultural ecosystems. According to the Ukrainian Forest Acts grazing, with specific exceptions, is allowed in forests.
292.a	2006	Ghana	Districts of Dormaa, Kwahu south, Fanteakwa, Gomoa, Afram Plains and Asante Akim South	R	6.459	-1.098	Predominantly farmers engaged in small-scale agricultural and forest production. Industrial and subsisitence food crop production includes cocoa, coffee, oil palm, citrus, cola-nuts, plantain, cassava, yam and maize. Some of the districts have forestry sectors employing local people. Hunting is important in some areas.	Eastern Guinean forests; Guinean forest-savanna mosaic	Tropical and subtropical moist broadleaf forests; Tropical and subtropical grasslands, savannas, and shrublands	These districts have participated in a pilot fire project financed by the International Tropical Timber Organisation (unclear in paper what this involved)
293.a	1998-2000	Brazil	Communities of São Francisco do Itacaiúnas (Marabá municipality) and Cupu (Jacundá municipality), Marabá region, Pará state	V23	-4.734	-49.57	Colonist peasants- mostly landless migrants originally from Brazil's northeastern regions, practising small-scale extractivism, agriculture (annual and perennial crops) and cattle rearing. The majority of families studied were living in their first landholding. However, many had significant farming and fire management experience in their regions of origin. São Francisco do Itacaiúnas was establis…	Xingu-Tocantins-Araguaia moist forests	Tropical and subtropical moist broadleaf forests	Since the latter half of the 20th century the Brazilian Government has encouraged the expansion of large scale agriculture in the Amazon region. The reaction of small-scale farming peasants has been to occupy latifundios, or large farms. Maintaining conquered lands as peasant's communities is a struggle for grassroots organizations, and one of their strategies is to support productive activities …	Academic discourses often exclude colonist peasants from the category of 'traditional' fire practices.
294.a	U	Namibia	Caprivi region	R	-17.895	22.782	Bayeyi, Khwe (San), Mafwe, Mbukushu and Subiya peoples, practising swidden agriculture, pastoralism, harvesting of natural products, hunting and honey collection.	Zambezian Baikiaea woodlands	Tropical and subtropical grasslands, savannas, and shrublands	Namibia has maintained a fire-prevention and suppression fire management policy since colonial administrations revoked local burning practices and control by traditional authorities 30–50 years ago. The Directorate of Forestry regulates fire management through the Forest Act of 2001, which is mainly concerned with: prohibiting fires within forest reserves, declaring fire hazard areas and specifyi…
295.a	U	Bangladesh	Dashnong village of Matiranga Upazila (a small administrative unit) of Khagrachari District, Chittagong Hill Tracts	V1	23.061	91.871	Tripura people, practising swidden agriculture (jhum), of upland rice and maize, as well as collecting forest products such as mushrooms, rattan, bamboo and fruits. Hunting is also a source of livelihood.	Lower Gangetic Plains moist deciduous forests	Tropical and subtropical moist broadleaf forests	Farmers in other villages in the region have been part of Government resettlement projects, that have relocated farmers to new settlements, giving them allocated plots of land for agroforestry.
296.a	U	Tanzania	Villages of Lugema, Makungu, Kiyowela, Isaula and Magunguli, Mgololo Administrative Ward, Mufundi District	V45	-8	35	Hehe people (Wahehe), practising subsistence agriculture, hunting and trapping and animal husbandry	Central and Eastern Miombo woodlands	Tropical and subtropical grasslands, savannas, and shrublands	The post-independence government was determined to improve standards of living by intensifying agriculture and providing social amenities. This was deemed to require villigisation. From the 1960s, and particularly in the 1970s, new settlements were created to resettle rural people.
297.a	U	Tanzania	Sub-villages of Matepwe, Nauwamba, Kipunga, Mkundi, Umoja, Likabuku, Kipunga, Likonde, Kikomolela and Lumumba in Lindi District	R	-9.885	39.478	Kimwera (Mwera) speaking people, practising swidden agriculture, with major food and cash crops of sesame, maize, rice, sorghum and pigeon peas. Generally farmers could be categorized into three groups based on the harvests from farming. The top rank comprises about 10% of villagers and is characterized as the group that harvests enough food lasting up to one year, hires casual laborers to work o…	Southern Zanzibar-Inhambane coastal forest mosaic	Tropical and subtropical moist broadleaf forests	The Agricultural Sector Development Plan (ASDP) developed in 1997 and reviewed several times since then provides clear objectives and strategies on how the Government of Tanzania in collaboration with development partners aim to bring about development and intensification in the agricultural sector. Intensification and mechanisation of agriculture also features heavily in the country's National S…
298.a	2008-2011	Mexico	Santiago Tlatepusco, Municipality of San Felipe Usila, Oaxaca State	V1	17.55	-95.517	Chinantec people, practising milpa swidden agriculture, agroforestry such as shade coffee, extraction of non-timber forest products, subsistence hunting and fishing.	Petén-Veracruz moist forests	Tropical and subtropical moist broadleaf forests	Beginning in 2003, the National Forestry Commission (Conafor; Comisión Nacional Forestal) established a Payments for Ecosystem Services scheme to support local landowners – if they maintain areas of forest cover – through a series of subsidies (compensatory payments) paid out over periods of five years to avoid changes in land use. Other governmental programmes, in conjunction with the National C…
299.a	2010	Spain	Valleys of Ansó and Hecho, autonomous region of Aragón, province of Huesca	V23	-0.78	42.73	Pastoralist communities	Pyrenees conifer and mixed forests	Temperate broadleaf and mixed forests	The residents of the valleys have had exclusive grazing rights since 1272. Summer pastures and much of the spring and autumn pasture surrounding the villages are formally owned by the local municipality and communally used by residents of each valley. Regulatory authority ultimately rests in the hands of the regional government, however, and enforcement of both government and locally-generated ru…
300.a	U	New Zealand	Te Rüätoki village, Te Urewara National Park	V1	-38.141	177.006	Mäori people	North island temperate forests	Temperate broadleaf and mixed forests	Mäori fire use was strongly regulated by European settlers, particularly after the Forest and Rural Fires Act in 1947. Today the National Rural Fire Authority has the responsibility for coordinating fire control in New Zealand’s forest and rural areas as determined by the Forest and Rural Fire Act 1977. Rural fire authorities carry out operational fire control and other rural fire management acti…
300.b	U	New Zealand	Tarawera Forest	U	-38.124	176.658	Mäori people	North island temperate forests	Temperate broadleaf and mixed forests	Mäori fire use was strongly regulated by European settlers, particularly after the Forest and Rural Fires Act in 1947. Today the National Rural Fire Authority has the responsibility for coordinating fire control in New Zealand’s forest and rural areas as determined by the Forest and Rural Fire Act 1977. Rural fire authorities carry out operational fire control and other rural fire management acti…
300.c	U	New Zealand	Settlement of Onepü, between Kawarau and Te Teko	V1	-38.04	176.768	Mäori people	North island temperate forests	Temperate broadleaf and mixed forests	Mäori fire use was strongly regulated by European settlers, particularly after the Forest and Rural Fires Act in 1947. Today the National Rural Fire Authority has the responsibility for coordinating fire control in New Zealand’s forest and rural areas as determined by the Forest and Rural Fire Act 1977. Rural fire authorities carry out operational fire control and other rural fire management acti…
[truncated: 210 more rows]

## Sheet: Fire practices
FID	CO	LATITUDE	LONGITUDE	TYPE	PU DES	FUPU1	FUPU2	MAR	FR	FR AVE	FR MIN	FR MAX	FR UNSP	FR RG	FR AN	MO	SE	CB	PA	PG	PO	AP	CM	COTYPE	AB	AB AVE	AB MIN	AB MAX	AB UNSP	AB RG	AB AN	FK	SS	LG	MB	CH	STP	STA	STF	NO
[truncated: 1,708 more rows]
